1 **Full title:** Conjunctive spatial and idiothetic codes are topographically organized in the

2 GABAergic cells of the lateral septum

3

4 **Short title:** Spatial and self-motion coding in the lateral septum

5

6 **Authors:** Suzanne van der Veldt<sup>1</sup>, Guillaume Etter<sup>1</sup>, Coralie-Anne Mosser<sup>1</sup>, Frédéric

7 Manseau<sup>1</sup>, Sylvain Williams<sup>1\*</sup>

8

9 <sup>1</sup> McGill University & Douglas Mental Health University Institute, Montreal, Canada

10 6875, Boul. LaSalle, Verdun (Quebec), H4H 1R3, Phone: 514 761-6131, Fax: 514 888-4067

11 \*Corresponding author: [sylvain.williams@mcgill.ca](mailto:sylvain.williams@mcgill.ca)

12

13

14 **Author contributions**

15 SV and SW designed the study. SV performed surgeries, behavioral recording experiments,

16 immunohistological experiments, and calcium data analysis. GE wrote code for MI

17 calculation and Bayesian decoding and implanted mice for CA1 recordings. CAM implanted

18 and recorded four mice that were used in the current study. FM performed and analyzed

19 patch-clamp in vitro electrophysiology. SV and SW wrote the manuscript with inputs from all

20 authors.

21

22

23

24

25

26

27 **Abstract**

28 The hippocampal spatial code's relevance for downstream neuronal populations – particularly  
29 its major subcortical output the lateral septum (LS) - is still poorly understood. Here, using  
30 calcium imaging combined with unbiased analytical methods, we functionally characterized  
31 and compared the spatial tuning of LS GABAergic cells to those of dorsal CA3 and CA1  
32 cells. We identified a significant number of LS cells that are modulated by place, speed,  
33 acceleration, and direction, as well as conjunctions of these properties, directly comparable to  
34 hippocampal CA1 and CA3 spatially modulated cells. Interestingly, Bayesian decoding of  
35 position based on LS spatial cells reflected the animal's location as accurately as decoding  
36 using the activity of hippocampal pyramidal cells. A portion of LS cells showed stable spatial  
37 codes over the course of multiple days, potentially reflecting long-term episodic memory.  
38 The distributions of cells exhibiting these properties formed gradients along the anterior-  
39 posterior and dorsal-ventral axes of the LS, directly reflecting the topographical organization  
40 of hippocampal inputs to the LS. Finally, we show using trans-synaptic tracing that LS  
41 neurons receiving CA3 and CA1 excitatory input send projections to the hypothalamus and  
42 medial septum, regions that are not targeted directly by principal cells of the dorsal  
43 hippocampus. Together, our findings demonstrate that the LS accurately and robustly  
44 represents spatial, directional as well as self-motion information and is uniquely positioned to  
45 relay this information from the hippocampus to its downstream regions, thus occupying a key  
46 position within a distributed spatial memory network.

47

48 **Abbreviations**

49 LH lateral hypothalamus

50 LS lateral septum

51 MS medial septum

52 VTA ventral tegmental area

53

## 54 **Introduction**

55 The lateral septum (LS) is an anatomically complex structure uniquely positioned  
56 within a broader distributed spatial memory network. The LS consists almost exclusively of  
57 highly interconnected inhibitory GABAergic cells [1,2] that are densely innervated by the  
58 principal cells of the hippocampus [3,4], in contrast to the medial septum (MS), which  
59 receives inputs solely from the inhibitory neurons of the hippocampus [5]. Previous research  
60 has implicated the LS in a wide variety of behaviors, including spatial and working memory  
61 [6–10], regulation of feeding [11–14], anxiety [15–18], locomotion [19,20], and social  
62 behaviors [21–24].

63 To date, functional characterizations of the LS have often focused on the spatial  
64 coding properties of these neurons, primarily due to the extensive excitatory input from  
65 positionally-tuned hippocampal pyramidal neurons, commonly referred to as 'place cells'  
66 [4,24–26]. Yet, this body of work has not yet yielded a consensus. Several studies have  
67 reported place-like cells in the LS, but the number, information content, and stability vary  
68 widely from study to study [20,27–31], while others described a lack of canonical place cells  
69 altogether [4]. As previous studies often depended on variable criteria of what defines a place  
70 cell, estimates range from 5.3% [4] to 56.0% [20] of LS cells classified as spatially-  
71 modulated. Strikingly, even estimates by the same authors on data acquired from the same  
72 subjects engaging the same task ranged between 26.5% [32] to 56.0% [20]. When reported,  
73 LS place cells are typically described as of lesser quality than classic hippocampal place  
74 cells, with lower within-session stability and larger place fields [30,31]. Adding to this  
75 complexity, the LS is a large structure that is cytoarchitecturally subdivided into dorsal,

76 intermediate, and ventral subregions that spread across its anterior-posterior axis [5,26,33].  
77 This suggests that, in addition to subjective criterias, the striking differences in LS spatial  
78 coding characteristics between studies may be in part a product of variations in recording  
79 locations within the region. In addition to positional information, LS neurons may also  
80 encode direction and self-motion information, including acceleration and velocity [20,30,31].

81 Beyond their spatial tuning properties, hippocampal place cells are also noted for the  
82 rapid reorganization of the place fields across time (on the order of days) and navigational  
83 contexts, a phenomenon termed remapping [34–38]. If the LS spatial code is directly  
84 inherited from its hippocampal inputs, one would expect comparable dynamics over a similar  
85 timescale. While the LS, similar to the hippocampus, has been implicated in behaviors that  
86 may require a stable representation of space over time, including context-reward [39,40],  
87 contextual fear conditioning [16,41–44], spatial learning and memory [32,45,46] remapping  
88 dynamics in the LS remain largely understudied. Thus, whether and how the LS spatial code  
89 changes across time is crucial to clarifying its relationship to the upstream hippocampal  
90 spatial code, with important implications for its involvement in this broader spatial memory  
91 network and how it supports behaviors across longer timescales.

92 To resolve these outstanding questions, we functionally characterize hippocampal  
93 connectivity of LS, and asked how information rich LS GABAergic neurons are in relation to  
94 their main pyramidal inputs in dorsal CA3 and CA1. To this end, we used head-mounted  
95 miniaturized microscopes to record ~2000 LS neurons across the anterior-posterior and  
96 dorsal-ventral axes of the LS, and compared their firing characteristics to pyramidal cells  
97 recorded in CA1 and CA3, as animals navigated linear track and open field environments.  
98 Results demonstrate that the LS accurately and robustly represents spatial, speed, and  
99 directional information in an anatomically-organized fashion. While the information of LS  
100 neurons is generally comparable to CA3 and CA1, our tracing studies suggest that LS

101 information is sent to downstream brain regions such as the MS and hypothalamus that are  
102 not directly connected by the principal cells of the dorsal hippocampus.

103

## 104 **Results**

105

### 106 **LS GABAergic neurons exhibit stable spatial activity during alternation on a linear** 107 **track**

108 Previous electrophysiological studies of the LS disagree on both the proportion of place  
109 encoding cells in this region and their spatial content. Cells have been previously described to  
110 be of lower quality than the classically described hippocampal place cells [20,30,32] or to be  
111 virtually absent [4].

112 First, to assess the distribution of excitatory pyramidal inputs from each hippocampal  
113 subregion to the GABAergic cells of the LS, we injected a monosynaptic retrograde rabies  
114 tracer in dorsal LS (Fig 1A, S1 Fig, n = 5 mice), utilizing the monosynaptically restricted,  
115 Cre-dependent retrograde tracing features of this technique. We observed strong labelling of  
116 pyramidal neurons of the hippocampus in areas CA1 and CA3 (Fig 1B, S1 Fig). To  
117 investigate how the spatial coding properties of the LS compare to these main dorsal  
118 hippocampal inputs, we expressed the calcium ( $\text{Ca}^{2+}$ ) indicator GCaMP6f in GABAergic  
119 cells of the LS or in the pyramidal cells of the dorsal CA1 (dCA1) and dorsal CA3 (dCA3) of  
120 mice (Fig 1C, S2 Fig, S3 Fig). We recorded  $\text{Ca}^{2+}$  activity from 1082 LS GABAergic neurons  
121 (n = 15 mice), 1251 dCA1 pyramidal cells (n = 5 mice) and 464 cells from dCA3 (n = 6  
122 mice) from animals alternating on a linear track. We subsequently filtered and binarized the  
123 recorded calcium traces (S4A Fig) [47] and excluded periods of immobility ( $< 5\text{cm}\cdot\text{s}^{-1}$ ).  
124 Using an information-theoretic framework [48–50], we computed the mutual information  
125 (MI) between calcium activity and spatial location for each cell and expressed the results in

126 bits (S4B Fig). As we observed a significant correlation between probability of a cell to be  
127 active ( $P(A)$ ) and MI (S4B Fig), we computed the MI value for 30 bootstrap samples (50%  
128 data sampling) and compared those to 30 circularly shuffled surrogates, which allowed us to  
129 compute significance of the MI value independently of  $P(A)$  (S4C-E Fig) [47]. We found that  
130 LS GABAergic activity was significantly spatially modulated ( $p < .01$ , Fig 1D, S4H Fig).  
131 Indeed, both mutual information and within-session stability was higher for spatially  
132 modulated LS cells compared to non-modulated cells (Mann-Whitney test,  $p < .0001$ , S4E-F  
133 Fig). Using this approach, a total of 43.90% of LS GABAergic cells qualified as spatially  
134 modulated (475/1082 cells), with LS cells similarly distributed along the linear track as place  
135 cells recorded from dorsal CA1 and dorsal CA3 (Fig 1E). In contrast to previous reports  
136 [4,20,32], we observed a significant difference in the proportion of spatially modulated cells  
137 across recording regions (LS:  $43.57 \pm 4.46$  %; dCA1:  $29.60 \pm 2.99$  %; dCA3:  $27.01 \pm 7.07$   
138 %; Kruskal-Wallis,  $H(3) = 6.212$ ,  $p = .0448$ ; Dunn's multiple comparisons test: LS-dCA1:  $p$   
139  $= 0.1757$ ; LS-dCA3:  $p = 0.1101$ ; Fig 1F). We found that within-session stability of spatially  
140 modulated cells (expressed as a correlation where 0 means no stability while 1 means  
141 perfectly stable) was significantly different between LS ( $0.44 \pm .0165$ ) and dCA3 ( $0.73 \pm$   
142  $0.26$ ; Kruskal-Wallis,  $H(3) = 80.48$ ,  $p < .0001$ ; Dunn's multiple comparisons test,  $p < .0001$ ),  
143 and between dCA1 and dCA3 ( $p < .0001$ ; Fig 1G). Even though LS GABAergic cells are not  
144 fast spiking (S5 Fig, S6 Fig) [51],  $P(A)$  in LS ( $0.02005 \pm 4.692 \times 10^4$ ) is higher than both  
145 dCA1 ( $0.0094 \pm 2.544 \times 10^4$ , Kruskal-Wallis,  $H(3) = 502.0$ ,  $p < .0001$ ; Dunn's multiple  
146 comparisons test,  $p > .0001$ ) and dCA3 ( $0.009225 \pm 3.759 \times 10^4$ ,  $p < .0001$ , S6A,B).  
147 Therefore, we assessed the mutual information in bits carried in each binarized event, and  
148 observed that the LS ( $5.624 \times 10^5 \pm 1.151 \times 10^6$  bits/binarized event) carries significantly less  
149 information per binarized event than CA1 ( $1.430 \times 10^4 \pm 1.613 \times 10^6$  bits/binarized event;  
150 Kruskal-Wallis,  $H(3) = 1288$ ,  $p < .0001$ ; Dunn's multiple comparisons test,  $p < .0001$ ); and

151 CA3 ( $1.130 \times 10^4 \pm 2.507 \times 10^6$ ; bits/binarized event;  $p < .0001$ , Fig 1H). To confirm that  
152 the observed differences in proportion of spatially modulated cells and within-session  
153 stability were not due to differences in  $P(A)$ , we used an activity cut-off of  $P(A) > .001$  and  
154 confirmed our previous results (S6D Fig).

155 In contrast to their omnidirectional firing properties in open field environments,  
156 hippocampal neurons rapidly develop strong directional selectivity on linear tracks [52–54].  
157 To test whether the LS place code developed comparable directional selectivity, we ranked  
158 spatially modulated cells as a function of the difference between MI for left and right  
159 traversals (S7A-D Fig), and found LS cells tuned to the absolute location regardless of  
160 direction (7.67%, 83/1082 cells), while other cells were selective to the left- (15.52%,  
161 168/1082 cells), or right-trajectories (22.08%, 239/1082 cells).

162

163 **Fig 1: LS shares spatial coding characteristics with its main hippocampal inputs CA1 and CA3**  
164 **during goal directed navigation in a 1D environment.**

165 (A) Retrograde rabies tracing injection site, blue = DAPI staining, green = TVA.oG coupled to an  
166 enhanced green fluorescent protein (eGFP), red = Rabies coupled to mCherry, orange: starter cells  
167 expressing both TVA.oG.eGFP and Rabies.mCherry. (B) Retrograde labelling in the dorsal  
168 hippocampus, coronal section. Bottom left: example of mCherry-positive CA1 pyramidal cell, bottom  
169 right: mCherry-positive CA3 pyramidal cells, blue = DAPI staining, red = Rabies coupled to  
170 mCherry. (For additional images see S1 Fig). (C) Top: Diagram of one-photon calcium recording  
171 setup in LS, CA1 and CA3 in freely behaving mice, with GCaMP6f expression restricted to  
172 GABAergic cells in LS, and restricted to pyramidal cells in dorsal CA1 and CA3, middle: histological  
173 verification of implantation site (see also S2 Fig and S3 Fig) and bottom: extracted calcium transients  
174 for LS, CA1 and CA3. (D) Top: Linear track paradigm, with sucrose rewards on either end. Bottom:  
175 Probability of an example cell to be active given the location on the linear track (red) with 95% upper  
176 and lower percentile (grey). Examples shown are from two different LS mice, and a representative

177 spatially modulated cell from one CA1 and CA3 animal each. (E) Activity of cells sorted along  
178 location in the maze for each region (blue, low; yellow, high). (F) Percent of significantly spatially  
179 modulated cells for each animal for each recording region. LS: N = 15 mice. CA1: N = 5 mice, N = 6  
180 mice. (G) Within-session stability of spatially modulated cells in each region active (LS: n = 475  
181 cells, CA1: n = 336 cells, CA3: n = 143 cells). (H) MI per binarized event for all cells (LS: n = 1030  
182 cells, n = 15 mice. CA1: n = 1251 cells, n = 5 mice, CA3: n = 464 cells, n = 6 mice). \*,  $p < .05$ , \*\*,  $p$   
183  $< .01$ , \*\*\*\*,  $p < .0001$ . Test used in F-H: Kruskal-Wallis with Dunn's multiple comparisons test.

184

185 Previous studies have used decoding methods to predict behavioral variables from  
186 calcium imaging data recorded in the hippocampus [34,38,55], yielding insights into the  
187 amount of information encoded by a neuronal assembly. Here, we asked whether we could  
188 reliably estimate the mouse location solely from LS neuronal activity patterns (Fig 2). Using  
189 30 bootstrap samples of 60 cells (Fig 2B,C), decoding location using LS neuronal activity  
190 significantly outperformed a decoder that was trained using shuffled data (paired t-test,  $t(6) =$   
191  $13.56$ ,  $p < .0001$ , Fig 2D), even when decreasing the number of neurons used (S8A,B Fig).  
192 Similarly, a decoder trained using CA1 or CA3 data also yielded significantly less error than  
193 one using shuffled surrogates (CA1:  $t(4) = 7.558$ ,  $p = .0016$ ; CA3:  $t(3) = 3.233$ ,  $p = .0481$ ,  
194 Fig 2D, S8C,D Fig). While using a small bootstrap sample size allowed a fair comparison  
195 between recording regions, it also induced higher error rates. To ensure the proper  
196 functioning of our decoder, we confirmed that the decoding error decreased significantly  
197 when increasing bootstrapped sample size (S8C,D Fig).

198 In order to compare decoding accuracy for LS, CA1 and CA3, a decoding score was  
199 computed (Fig 2E, see methods), and we found that LS significantly outperformed CA3 (one-  
200 way ANOVA,  $F(2,13) = 6.277$ ,  $p = .0124$ ; Holm-Sidak's multiple comparisons test  $p < .05$ ),  
201 but not CA1. Overall, spatially modulated cells recorded in LS were significantly more active  
202 than those recorded in the hippocampus ( $H(3) = 155.1$ ,  $p < .0001$ , S5A,B Fig), which could



203 be a contributing factor to the overall higher decoding accuracy using LS cells. To confirm  
204 that the differences observed in decoding error are not due to the inclusion of a large number  
205 of pseudo-silent cells in the dCA1 or dCA3 bootstrapped samples, we confirmed our findings  
206 using an activity cut-off of  $P(A) > .001$  (S8E-F). Similarly, to confirm that the observed  
207 differences in decoding error are not due to the use of a temporal smoothing window, we  
208 replicated our results using a decoder that omitted temporal filtering (S8G-H).

209

210 **Fig 2: Location can be reliably decoded from lateral septum GABAergic cells.**

211 (A) Top: Posterior probabilities for each frame estimated from binarized calcium activity, bottom:  
212 corresponding actual (green) and decoded (red) location. (B) Schematic representation of  
213 bootstrapping approach. (C) Method for computing mean Euclidean distance decoding error (in cm)  
214 for each bootstrapped estimate. (D) Decoding error for actual vs shuffled dataset (30 bootstrapped  
215 samples of 60 cells, LS:  $N = 7$  mice, CA1:  $N = 5$  mice, CA3: LS = 4 mice). (E) Mean decoding score  
216 for each region. \*,  $p < .05$ , \*\*,  $p < .01$ , \*\*\*\*,  $p < .0001$ , Test used in D, paired t-test, E, one-way  
217 ANOVA, Holm-Sidak's multiple comparisons test.

218

219 **LS GABAergic neurons exhibit stable spatial activity during free exploration in a 2D**  
220 **environment**

221 In order to assess spatial coding during free exploration in a two-dimensional environment,  
222 we recorded  $Ca^{2+}$  activity of 1899 GABAergic neurons in 28 mice implanted in distinct  
223 subregions of the LS, while the animals were freely exploring a novel open field. Out of 1899  
224 recorded cells, 37.80% (718/1899 cells,  $n = 28$  mice) of LS cells displayed significant spatial  
225 information ( $p < .01$ ; Fig 3A-B, S9 Fig), as compared to 31.33% (323/1031 cells,  $n = 6$  mice)  
226 in CA1 and 25.84% (138/534 cells,  $n = 8$  mice) CA3 cells. Despite the LS' known  
227 involvement in feeding-related behaviors [11–14], we did not observe any increased number  
228 of cells with firing fields around food zones, nor did we observe overrepresentation of objects

229 or walls (S10 Fig). To assess reward-modulation in the context of increased task demand, we  
230 assessed spatial firing of LS GABAergic neurons recorded while animals performed a  
231 delayed non-matching to place task in a T-maze, but did not observe any significant reward  
232 code compared to shuffled surrogates (S11 Fig).

233 With theta-rhythmic cells in the LS having higher firing rates than theta-rhythm  
234 independent cells [56], and the suggestion that theta-rhythmic cells could receive direct  
235 hippocampal inputs (though see [57,58]), we asked whether LS cells with higher firing rates  
236 were also more likely to be spatially modulated. Indeed, spatially-modulated cells were  
237 significantly more active than non-modulated cells (Mann-Whitney test,  $U = 342219$ ,  $p <$   
238  $.0001$ ; S9G-H Fig) and displayed a higher bursting index, defined as the probability of a cell  
239 being active, given it was already in an active state, or  $P(A_t|A_{t-1})$ , than non spatially  
240 modulated cells (Mann-Whitney test,  $U = 368276$ ,  $p < .0001$ ; S9H Fig).

241 We compared the place field properties of cells recorded in LS to those of dorsal CA1  
242 and CA3 (Fig 3). For each animal, we computed the portion of significantly positionally  
243 modulated cells per region, which was not significantly different across LS ( $36.71 \pm 2.16$  %),  
244 dCA1 ( $38.32 \pm 9.36$  %), and dCA3 ( $28.39 \pm 6.73$  %; one-way ANOVA,  $F(2,39) = 1.105$ ,  $p =$   
245  $.3414$ ; Fig 3B). We computed the information for each binarized event, and observed that the  
246 LS ( $1.020 \times 10^4 \pm 7.56 \times 10^7$  bits/binarized event) carries significantly less information per  
247 binarized event than CA1 ( $1.200 \times 10^4 \pm 1.067 \times 10^6$  bits/binarized event; Kruskal-Wallis,  
248  $H(3) = 264.6$ ,  $p < .0001$ ; Dunn's multiple comparisons test,  $p < .0001$ ) and CA3 ( $1.199 \times 10^4$   
249  $\pm 1.605 \times 10^6$  bits/binarized event;  $p < .0001$ ). As expected on the basis of prior results  
250 [4,28,30,31], within-session stability of LS cells ( $0.31 \pm 0.011$ ) was significantly lower than  
251 that of spatially modulated cells recorded in CA1 ( $0.44 \pm 0.017$ ; Kruskal-Wallis,  $H(3) =$   
252  $89.52$ ,  $p < .0001$ ; Dunn's multiple comparisons test,  $p < .0001$ ) and CA3 ( $0.56 \pm 0.027$ ;  $p <$   
253  $.0001$ ; Fig 3D), and place fields were more dispersed (LS:  $14.47 \pm 0.13$  cm; CA1:  $12.00 \pm$

254 0.207 cm; CA3:  $10.61 \pm 0.35$  cm; Kruskal-Wallis,  $H(3) = 155.7$ ,  $p < .0001$ , Fig 3E). Similar  
255 to recordings in a 1D environment, we observed large differences in  $P(A)$  between spatially  
256 modulated cells recorded from LS and those from dorsal CA1 and CA3 (S12A Fig).  
257 Therefore, we also assessed for each region the proportion of spatially modulated cells, split-  
258 half stability and mean-dispersion using an activity cut-off of  $P(A) > .001$ , and confirmed our  
259 results (S12B Fig).

260 When decoding the location of the animals using bootstrap samples of 80 cells from  
261 each region (Fig 3F), decoding error was significantly lower in LS ( $20.16 \pm 1.48$  cm)  
262 compared to shuffled surrogates ( $26.03 \pm 0.84$  cm; two-way RM ANOVA,  $F(1,13) = 89.09$ ,  $p$   
263  $< .0001$  for main effect of shuffle), even when decreasing the number of neurons used to only  
264 40 neurons (S13A,B). Omission of temporal filtering recapitulated these results (S13E Fig).  
265 The same held true for decoders trained using CA1 or CA3 data respectively (S13C,D).  
266 Strikingly, a decoder trained on data from LS does not perform significantly worse than a  
267 decoder trained on CA1 or CA3 data ( $F(2,13) = 2.186$ ,  $p = 0.2384$  for main effect of region;  
268 Fig 3H). Similarly to recordings on the linear track, we used an activity cut-off of  $P(A) > .001$   
269 to confirm that the differences observed in decoding error between regions are not due to the  
270 inclusion of a large number of pseudo-silent cells in the bootstrapped sample (S13F Fig).

271

272 **Fig 3: LS shares spatial coding characteristics with its main hippocampal inputs CA1 and CA3**  
273 **during free exploration in a 2D environment.**

274 (A) Example tuning maps of spatially modulated cells recorded from LS, dorsal CA1 and dorsal CA3  
275 in a 45 x 45 cm open field (3 x 3 cm bins). (B) Proportion of spatial cells per animal (LS:  $n = 28$  mice;  
276 dCA1:  $n = 6$  mice; dCA3:  $n = 8$  mice). (C) MI (bits) per binarized event for all cells recorded from  
277 each region (LS:  $n = 1899$  cells from  $n = 28$  mice; dCA1:  $n = 1031$  cells,  $n = 6$  mice; dCA3:  $n = 534$   
278 cells,  $n = 8$  mice). (D) Within session stability for spatial cells (LS:  $n = 734$  spatial cells from  $n = 28$   
279 mice; dCA1:  $n = 424$  spatial cells,  $n = 6$  mice; dCA3:  $n = 138$  spatial cells,  $n = 7$  mice). (E) Left:

280 mean dispersion computation, right: mean dispersion for all spatial cells recorded from each region.  
281 (F) Method for computing the mean decoding error. (G) Bootstrapping approach using 80 randomly  
282 selected cells, for 30 bootstrapped samples. (H) Mean decoding error for LS (n = 8 mice), CA1 (n = 4  
283 mice) and CA3 (n = 4 mice). \*1,  $p < .05$ , \*\* $p < .01$ , \*\*\*\* $p < .0001$ , Test used in B, one-way  
284 ANOVA, C-E, Kruskal-Wallis, Dunn's multiple comparison test, H, two-way ANOVA, Sidak's  
285 multiple comparisons test.

286

### 287 **A subset of LS cells has stable spatial representations up to 8 days, similar to CA1**

288 To test whether the LS and the hippocampus exhibit comparable evolutions of their  
289 spatial code over time, we recorded from animals implanted in LS and dorsal CA1 in a novel  
290 open field over both short (3 days) and longer timescales (8 days, Fig 4, S14 Fig). We  
291 assessed the stability of the spatial map across sessions, and observed a subset of LS spatially  
292 modulated cells that were stable over time (Fig 4B). Correlating the tuning maps of aligned  
293 LS cell pairs over days lead to a significant increase in mean pairwise correlation value over  
294 days (two-way ANOVA,  $F(2, 808) = 3.259$ ,  $p = 0.0389$ , main effect of time) with LS cells  
295 being statistically more stable than shuffled comparisons ( $F(2,808) = 277.0$ ,  $p < .0001$ , main  
296 effect of shuffling, Fig 4C, S14C Fig). We observed the opposite pattern for pyramidal cells  
297 recorded from dorsal CA1, with a significant decrease in mean pairwise correlation value  
298 over days (two-way ANOVA,  $F(2,766) = 33.47$ ,  $p < 0.0001$  main effect of time,  $F(1,766) =$   
299  $319.8$ ,  $p < 0.0001$  main effect of shuffle, Fig 4C). For cells recorded in the LS, we observed  
300 the strongest within-session stability on day 3 (Kruskal-Wallis,  $H(4) = 19.16$ ,  $p = 0.0003$ ;  
301 S14E Fig), as well as an increase in spatial information (Kruskal-Wallis,  $H(4) = 13.27$ ,  $p =$   
302  $0.0041$ ; S14B Fig). There was no significant increase in the proportion of stable cell pairs  
303 over subsequent days (one-way ANOVA,  $F(3) = .400$ ,  $p = .9537$ , S14D Fig), or the  
304 proportion of spatially modulated cells per animal for each days (one-way ANOVA,  $F(3,16)$   
305  $= 1.618$ ,  $p = .2247$ , S14E Fig).

306 We next assessed the significant tuning map correlations on subsequent day-pairs for  
307 those cells that were significantly spatially modulated on day 1 and were subsequently found  
308 on all recording days (Fig 4D), as well as those that passed our criteria for spatial modulation  
309 on all days (Fig 4E). We then compared the place field correlation for different day pairs  
310 ( $F(5,363) = 2.625$ ,  $p = .0239$ , interaction effect), and we found that on shorter timescales,  
311 tuning maps for LS cells ( $0.316 \pm 0.0507$ ) are significantly less correlated than CA1 ( $0.497 \pm$   
312  $0.0411$ ; Fisher's LSD day 1-2,  $p = 0.0153$ , Fig 4F). On the other hand, the correlation for day  
313 pairs 3-8 is higher for the LS ( $0.369 \pm 0.0513$ ) compared to dorsal CA1 ( $0.174 \pm 0.0669$ ;  
314 Fisher's LSD,  $p = 0.0098$ ; Fig 4F). Together, this suggests that a subset of LS spatial cells  
315 encodes spatial information over longer periods of time.

316

317 **Fig 4: LS place code remains similar to CA1 over longer periods of time.**

318 (A) Experimental setup (top) with a representative example of an animal implanted in the LS, and  
319 aligned spatial footprints of cells recorded over days (bottom). (B) Tuning maps for two sets of stable  
320 cells recorded over all days, with each row being one aligned cell. Within-session correlation  
321 indicated in blue. Tuning map correlation indicated at the bottom in red. (C) Significant tuning map  
322 correlation for aligned cell-pairs (black) versus shuffled pairs (red) for progressive days for LS (day 1-  
323 2,  $n = 157$  cells; day 2-3,  $n = 122$  cells; day 3-8,  $n = 129$  cells;  $n = 5$  mice) and dorsal CA1 (day 1-2,  $n$   
324  $= 165$  cells; day 2-3,  $n = 122$  cells; day 3-8,  $n = 99$  cells ;  $n = 3$  mice). (D) Significant tuning map  
325 correlations for all cells found on all days for LS ( $n = 84$ ) and CA1 ( $n = 86$ ). (E) Matrix of mean  
326 tuning map correlation for all aligned cells that were significantly spatially modulated on each day,  
327 for LS ( $n = 23$ -37 cells,  $n = 5$  mice) and CA1 ( $n = 23$  - 41 cells,  $n = 3$  mice). (F) Mean tuning map  
328 correlation for data shown in E. \*,  $p < .05$ , \*\*,  $p < .01$ , \*\*\*\*,  $p < .0001$ . Test used in C, two-way  
329 ANOVA, with Sidak's multiple comparisons test, F, two-way ANOVA, with Fisher's LSD post-hoc  
330 test.

331

332 **LS represents direction, velocity, and acceleration information**

333 In CA1, place cells have been found to carry directional [59–61] and speed-related  
334 information [61–64]. Previous studies found that subsets of LS neurons show some degree of  
335 modulation by direction of travel [31] as well as velocity and acceleration [20] through  
336 correlative measures in spatial alternation or T-maze navigation tasks, where the relationship  
337 between cell activity patterns and movement-associated variables may be confounded with  
338 task-dependent variables. Here, we again employed an information-theoretic approach to  
339 compute the MI between calcium activity and each of these self-motion correlates in a subset  
340 of mice recorded during a 15 min free foraging task in the open field. We found that 28.13%  
341 of LS cells are significantly modulated by head-direction (346/1230 cells,  $n = 19$  mice, Fig  
342 5A, S15 Fig), 18.70% by velocity (230/1230 cells, Fig 5C) and 24.63% by acceleration  
343 (303/1230 cells, Fig 5E). We assessed the stability of LS directional and self-motion tuning  
344 over short (3 days) and longer timescales (8 days, S16 Fig), and we observed a subset of LS  
345 directionally modulated cells that were stable over time (S16A Fig). Mean tuning vectors  
346 correlation of aligned LS cell pairs significantly increased over days (two-way ANOVA,  
347  $F(2,774) = 3.682$ ,  $p = 0.0256$ , main effect of time) with LS cells being statistically more  
348 stable than shuffled surrogates ( $F(1,774) = 54.42$ ,  $p < .0001$ , main effect of shuffling, S16C  
349 Fig). For velocity or acceleration tuning, we did not observe such stable tuning over time  
350 (two-way ANOVA, velocity:  $F(1,506) = 2.609$ ,  $p = .1069$ , acceleration:  $F(1,320) = .1986$ ,  $p$   
351  $= .6561$ , main effect of shuffle, S16D,E).

352 We compared the proportion of LS cells significantly modulated by each of these  
353 variables with the proportion of those cell-types found in dCA1 and dCA3. The proportion of  
354 directionally modulated cells was significantly different across regions (LS:  $27.89 \pm 2.16$ ,  
355 dCA1:  $46.11 \pm 4.98$ , dCA3:  $28.92 \pm 4.52$ ; Kruskal-Wallis,  $H(3) = 6.586$ ,  $p = .0371$ , Fig 5B)  
356 with a higher proportion of directionally modulated cells in CA1 as compared to LS (Dunn's  
357 multiple comparisons test,  $p = .0340$ ; Fig 5B). The proportion of velocity encoding cells was

358 not significantly different between LS ( $20.43 \pm 2.598$ ), CA1 ( $24.38 \pm 7.73$ ), or CA3 ( $20.04 \pm$   
359  $3.62$ ; Kruskal-Wallis,  $H(3) = 0.1016$ ,  $p = 0.9504$ , Fig 5D). Similarly, no difference was found  
360 in the proportion of acceleration encoding cells between LS ( $25.11 \pm 2.34$ ), CA1 ( $24.14 \pm$   
361  $4.13$ ), or CA3 ( $22.60 \pm 2.98$ , Kruskal-Wallis,  $H(3) = 0.3337$ ,  $p = 0.8463$ , Fig 5F). We found a  
362 proportion of cells that were significantly tuned to more than one of these variables in both  
363 LS as well as dCA1 and dCA3 (Fig 5G, S15A-D Fig, S17 Fig), with 22.03% of LS cells  
364 (271/1230 cells) encoding more than one modality (Fig 5H). Together, this conjunctive  
365 coding for location, directionality, and velocity indicates that LS cells fire in response to  
366 more complex navigational features, similarly to the hippocampus.

367

368 **Fig 5: LS GABAergic cells encode direction, speed, and acceleration.**

369 (A) Left: Activity of an example LS neuron during free exploration in an open field, top: head  
370 direction (HD, red), middle: binarized activity (yellow), bottom: raw calcium activity (blue). Right:  
371 Corresponding polar plot indicating the probability of the cell being active as a function of the  
372 animals' HD with (black,  $p(\text{active} | \text{direction})$ ), red lines indicate 95% upper and lower percentile. Blue  
373 line indicates the normalized time spent for each direction. MI calculated using 40 bins of  $9^\circ$ . S15 Fig.  
374 (B) Proportion of significantly directionally modulated cells in LS, dCA1 and dCA3. (C) Left:  
375 Activity of an example LS neuron during free exploration modulated by velocity (top, red), middle:  
376 binarized activity (yellow), bottom: raw calcium activity (blue). Right: Tuning curve for velocity for  
377 the example cell (red) with 95% upper and lower percentile in grey. MI calculated using 20 bins. (D)  
378 Proportion of significantly speed modulated cells in LS, dCA1 and dCA3. (E) Left: Activity of an  
379 example LS neuron during free exploration modulated by acceleration (top, red), middle: binarized  
380 activity (yellow), bottom: raw calcium activity (blue). Right: Tuning curve for acceleration for the  
381 example cell (red) with 95% upper and lower percentile in grey. MI calculated using 20 bins. (F)  
382 Comparison of proportions of significantly modulated cells for each region. (G) Example of an LS  
383 cell that is both significantly head direction modulated (left), as well as spatially modulated (right).  
384 (H) Left: Proportion of cells that are significantly modulated by only one modality (grey), two

385 modalities (yellow), three (red) or all 4 of the investigated variables (black). The number above the  
386 bars indicates the absolute number of cells found to be modulated in the total population ( $n = 1230$   
387 cells,  $n = 19$  mice). Right: absolute proportion of cells modulated by any combination of variables.  
388 Test used in B, D, F: Kruskal-Wallis test with Dunn's multiple comparisons test. \*,  $p < .05$ . D =  
389 direction, A = acceleration, S = spatial coding, V = velocity.

390

391 To understand the function of this downstream copy of the hippocampal spatial code,  
392 we assessed the downstream targets of the dCA1/dCA3 to LS projection. First, we used a  
393 Cre-dependent, anterograde tracing approach to confirm LS projections to the hypothalamus  
394 and ventral tegmental area in the mouse (S18 Fig), as it was initially described in the rat  
395 [3,5,25]. Next, we leveraged the anterograde transsynaptic properties of Cre-expressing  
396 AAV1 viral vector [65] and assessed the targets of the dorsal CA1-lateral septum (dCA1-LS)  
397 as well as dorsal CA3-LS (dCA3-LS) projections (Fig 6). For either dCA1 or dCA3  
398 injections (Fig 6A, S19 Fig), we observed a direct pathway from the principal cells of the  
399 hippocampus, via the LS, leading to dense innervation of the medial septum (Fig 6B) and the  
400 hypothalamic regions (Fig 6C). We observed that dCA1-LS preferentially targets the LH, and  
401 dCA3-LS targets the hypothalamus more broadly as well as the nuclei of the medial zone.  
402 Whether the GABAergic cells of the lateral septum form functional synapses at the level of  
403 the medial septum/diagonal band complex is debated [5,26,66–68]. Thus, in order to  
404 determine whether the projections observed at the level of the MS with both our anterograde  
405 tracing approaches constituted passing fibers or synaptic connections, we used an AAV-Flex-  
406 Synaptag [69], a Cre-dependent viral construct to express mRuby in the cytosol and eGFP  
407 bound to synaptophysin, a protein primarily expressed in the presynaptic endings of cells  
408 participating in synaptic transmission (Fig 6D). For this, we used a CaMKII $\alpha$ -Cre mouse line,  
409 expressing Cre only in CAMKII-positive cells, a marker that is abundant in the GABAergic  
410 cells of the LS but absent in the MS, thereby preventing any unspecific labelling. After



411 expressing AAV-Flex-Synaptag in the intermediate LS, we observed significant  
412 synaptophysin-bound projections in the MS (Fig 6E), confirming the existence of a synaptic  
413 interface between the LS and the MS. Together, our work shows that LS receives direct  
414 inputs from dorsal CA1 and CA3 and in turn projects to regions that are not directly receiving  
415 inputs from the hippocampus itself (Fig 6F).

416

417 **Fig 6: LS cells receiving hippocampal inputs project directly to hypothalamus and medial**  
418 **septum.**

419 (A) Diagram of dual-viral injection strategy for anterograde transsynaptic tracing. The diagram is  
420 based on dorsal CA1 targeted injection, dCA3 is also used for injections, together with coronal  
421 sections showing primary injection sites in dorsal CA1 (top) or dorsal CA3 (bottom). Red = tdTom  
422 expression, blue = DAPI, with zoomed images showing tdTom-positive cell bodies are predominantly  
423 located in the pyramidal layer (bottom). For additional images of spread of injection, see S19 Fig. (B)  
424 eYFP-positive cell bodies at the anterior dorsal LS and fibers at the level of the medial septum  
425 following dCA1 injection (left) and dCA3 injection (right). Inset left: eYFP-positive fibers at the level  
426 of MS. (C) eYFP positive axons are seen bilaterally at the level of the lateral hypothalamus following  
427 dCA1 injection (left) and dCA3 injection (right). (D) Injection strategy for Cre-dependent AAV.  
428 Synaptag mediated tracing in the LS. (E) Coronal section of dorsal LS, with synaptophysin-bound  
429 eYFP at the MS. Top right: Zoomed images showing transduction at the injection site. Bottom right:  
430 eYFP-positive fibers. (F) Schematic with proposed connections of the LS within the hippocampal  
431 network. Scale bars: B, left and right: 800  $\mu$ m. C, left and right: 500  $\mu$ m. DM = dorsomedial  
432 hypothalamic nucleus, LH = lateral hypothalamus.

433

434 **LS-cells coding for space, direction and self-motion are non-uniformly distributed**

435 To map out the monosynaptic connections between hippocampal and LS neurons, we injected  
436 the anterograde transsynaptic Cre-expressing AAV1 viral vector [65], in either dCA1 or  
437 dCA3 (S19 Fig, S20A Fig). We subsequently injected a Cre-dependent eYFP expressing

438 virus in the LS to visualize cells that receive direct hippocampal input (S20B Fig).  
439 Importantly, this approach allowed us to quantify the cells along the LS anterior-posterior and  
440 dorsal-ventral axis receiving direct hippocampal inputs, and assess their distribution density  
441 within the anterior regions of the LS (Bregma +1.0 to 0.0 anterior-posterior). Because we can  
442 only observe secondary labelled cell-bodies at locations where there was infusion of the  
443 secondary, Cre-dependent virus, we used a relatively large injection volume (total 800 nL,  
444 targeted at the intermediate LS). Both dorsal dCA1 and dCA3 injections resulted in a  
445 majority of labelled LS cell bodies in dorsal regions compared to intermediate and ventral LS  
446 (S20D-F Fig). Hence, LS neurons receiving direct inputs from dorsal CA1 and CA3 appear to  
447 be localized at more dorsal-posterior regions as compared to more ventral-anterior regions of  
448 LS.

449         Next, we examined whether spatially modulated cells recorded in LS had spatial  
450 properties that were dependent on the localization of their recording. To measure this, we  
451 classified the location of GRIN lens implants along the dorsal-ventral and anterior-posterior  
452 axis (Fig 7A). Post-mortem histological verification of GRIN lens implant combined with  
453 within-animal analysis of the location of recorded cells enabled us to approximate the  
454 location of each cell (Fig 7B). While we observed no differences in cell activity  
455 characteristics, such as bursting index or activity probability along the anterior-posterior axis,  
456 medial-lateral or dorsal-ventral axis (S21 Fig), we found a pronounced increase in the portion  
457 of stable spatially modulated cells (within-session stability > .5) along the anterior-posterior  
458 axis (linear regression,  $R^2 = 0.1071$ ,  $p = 0.0022$ , the proportion of stable cells per 0.2 mm bin  
459 per animal,  $n = 24$  mice, Fig 7C). We observed a similar gradient along the dorsal-ventral  
460 axis, with a larger proportion of stable spatial cells found at the more dorsal regions of the  
461 LS, although this trend failed to reach significance (linear regression,  $R^2 = 0.1399$ ,  $p = .0718$ ,  
462  $n = 24$  mice, Fig 7C). Taken together, these data strongly suggest that regions of the LS that

463 receive stronger innervation from the dorsal hippocampus have a larger proportion of cells  
464 that reliably encode space. This suggests that this information could be directly inherited  
465 from the hippocampus, which should be tested using targeted inactivation of the hippocampal  
466 pyramidal inputs to LS.

467 We also assessed the topographical distribution of direction and self-motion tuned  
468 cells within the LS. We observed a relatively strong dorsal-ventral gradient in the distribution  
469 of stable (within-session stability > .5) directionally modulated cells (linear regression,  $R^2 =$   
470  $0.3837$ ,  $p = 0.0061$ ,  $n = 17$  mice, Fig 7C), with most directionally modulated cells located at  
471 the more dorsal regions of the LS, but we did not observe such a gradient along the anterior-  
472 posterior axis (linear regression,  $R^2 = 0.0544$ ,  $p = .0615$ ,  $n = 24$  mice, Fig 7C). Velocity  
473 modulated cells were primarily found at the ventral pole of the LS (linear regression,  $R^2 =$   
474  $0.1836$ ,  $p = 0.0367$ ,  $n = 24$  mice), but no such gradient was found along the anterior-posterior  
475 axis (linear regression,  $R^2 = .00348$   $p = .0874$ ,  $n = 24$  mice). Acceleration-modulated cells  
476 were found evenly distributed throughout the LS (DV:  $R^2 = .0133$ ,  $p = .2928$ ; AP:  $R^2 =$   
477  $.01332$ ,  $p = .2929$ ,  $n = 24$  mice).

478

479 **Fig 7: LS-cells coding for space, direction and self-motion correlates are non-uniformly**  
480 **distributed along the dorsal-ventral and anterior-posterior axis.**

481 (A) Strategy to record from different anterior-posterior levels in LS (left) and implantation sites  
482 covered. (B) Strategy to approximate cell location. Background: Maximal projection of representative  
483 recording, red: outline of approximated GRIN lens position, white: distance from the centre of the  
484 GRIN lens to the cells of interest. (C) Top: For .2 mm bins along dorsal-ventral axis, proportion of  
485 stable (within-session stability > .5) spatially modulated cells ( $n = 24$  mice), directionally modulated  
486 cells ( $n = 17$  mice), velocity cells ( $n = 24$  mice) and acceleration cells ( $n = 24$  mice) respectively.  
487 Bottom: Same as top for anterior-posterior axis. Each red dot represents the average per animal per

488 bin along the anterior-posterior axis (left) and along the dorsal-ventral axis. Black lines indicate 95%  
489 confidence intervals. \*,  $p < .05$ , \*\*,  $p < .01$ , Test used in C: linear regression.

490

## 491 **Discussion**

492 While spatial coding has been extensively characterized in the hippocampal  
493 formation, how downstream regions integrate this information has only recently begun to  
494 receive attention. The LS has re-emerged as a critical region implicated in a space encoding  
495 network, although electrophysiological recordings of the LS in rats have led to disparate  
496 estimates of the quantity and quality of place cells in the region [4,20,28,32]: LS place cells  
497 recorded on a circular track were described to be almost absent [4], but were found to be  
498 abundant in reward-seeking tasks [20,32]. Using a large calcium imaging dataset and  
499 unbiased information metric and decoding approaches, we found that 37.80% of GABAergic  
500 LS cells robustly code for space during free exploration in an open field and 43.90% of cells  
501 during linear track alternation. One of the major features of the linear track is the induction of  
502 directional place fields in LS, which may underlie some of the differences we observed in 1D  
503 versus 2D spatial coding characteristics.

504 In addition to spatial information, we found that the LS also reliably encodes velocity,  
505 acceleration, and directional information, suggesting that the LS encodes more complex  
506 navigational features than previously thought. Neuronal representations in the hippocampus  
507 have been found to change over time, with place code ensembles changing rapidly: an  
508 estimated ~40% [34] to ~75-85% [38] of CA1 neurons were found to remap over days. The  
509 stability of the LS spatial code has received little attention to date. In the current study, we  
510 found a subpopulation of cells in the posterior LS that display stable place fields over eight  
511 days. The functional role of such stability remains to be elucidated. One possibility is that this  
512 ensemble may mediate the stable encoding of contexts over longer durations of time, which

513 could account for the critical importance of the LS for a number of spatial behaviors,  
514 including contextual fear conditioning [16,41–44], context-reward associations [39,40] and  
515 radial-maze navigation tasks [45,46].

516         Similar to the change in properties of hippocampal place cells along the dorsal-ventral  
517 axis [70,71], previous work has hinted at a dorsal to ventral organization of the LS place  
518 code: electrophysiology studies recorded a slightly larger proportion of LS place cells in the  
519 more dorsal regions [30]. A complementary anatomical microstructure has been previously  
520 described for the rate-independent phase code in the LS, where the strength of the phase code  
521 increased as a function of recording depth along the dorsal-ventral axis [4]. Here we find that  
522 lateral septal spatially modulated cells are arranged along an anterior-posterior gradient  
523 similar to the gradient of hippocampal inputs into the LS – a finding that helps to reconcile  
524 the variation in previously reported estimates of spatial cells in the LS, which ranged between  
525 5.3% of cells recorded along the dorsal-ventral axis [4] up to 56% recorded at the most dorsal  
526 level of the LS [20]. This pattern suggests that the inhibitory neurons of the LS may inherit a  
527 place code from the hippocampus, with subregions receiving dorsal hippocampal inputs being  
528 most similar to the classical hippocampal place cells. Interestingly, this is not the only case of  
529 GABAergic neurons inheriting some spatial properties from hippocampal pyramidal cells:  
530 interneurons within CA1 have been shown to exhibit significant spatial modulation and  
531 comparable information as pyramidal place cells, although with a higher firing rate and  
532 greater spatial dispersion [72]. It should be considered that, although the hippocampus seems  
533 a likely source of the positional information encoded by the LS, this information could also  
534 arise from incoming projections from any other region projecting to LS, such as the  
535 entorhinal cortex [5,25] which could account for part of head direction and velocity tuning.

536         In addition to spatial modulation of LS cells, we observed a significant number of  
537 velocity and acceleration modulated cells in the LS. These cells have been previously

538 described by others on the basis of correlative measures, although estimated proportions vary  
539 widely: for velocity tuning in reward-seeking tasks, estimates range from almost absent [4] to  
540 almost 60% of cells [20]. For acceleration, approximately 45% of LS cells were found to  
541 show some degree of correlation, with almost 30% of recorded cells correlated with both  
542 speed and acceleration [20]. Here, using information metrics and a free exploration task in  
543 which firing characteristics are not confounded with task parameters, we find that 18.70% of  
544 cells were modulated by velocity and 24.63% by acceleration. Cells reliably coding for both  
545 velocity and acceleration were relatively rare (2%). Velocity and acceleration cells were  
546 distributed dissimilarly in the LS, with velocity cells being more abundant towards the ventral  
547 pole, whereas acceleration modulated cells were found to be distributed equally. This raises  
548 the question whether velocity and acceleration information are inherited from different areas  
549 upstream of the LS. Interestingly, cells coding for direction were more abundant towards the  
550 dorsal portion of the LS, but distributed equally along the anterior-posterior axis. Previous  
551 studies have identified classical head direction cells in multiple, well-described circuits,  
552 including the postsubiculum [73,74], anterodorsal thalamic nucleus [75], mammillary bodies  
553 [76], entorhinal cortex [77], retrosplenial cortex [78,79] and parasubiculum [80,81]. A likely  
554 source of directional information to the LS is the entorhinal cortex [82]. Our work supports  
555 the perspective that LS neurons combine a wide range of modalities and may form a complex  
556 representation of context over longer timescales than previously reported. In addition to  
557 space, velocity, and reward information, hippocampal pyramidal cells have been shown to  
558 encode variables such as time [83,84], odor [85,86] and sound frequency [87]. Whether this  
559 information is also relayed to the LS remains to be elucidated. Despite this  
560 interconnectedness with the LH and previous reports of LS place cells being skewed towards  
561 reward in a spatial navigation task [32], we did not observe any overrepresentation of LS

562 spatially modulated cells around food zones during free exploration or around the reward  
563 zone in a T-maze non-match-to-place paradigm.

564 The question arises of what the function could be of having a region downstream of  
565 the hippocampus that expresses such seemingly similar coding characteristics. Previous work  
566 estimated the convergence of hippocampal efferents onto LS neurons to be 20 to 800 times  
567 more dense than to any of its cortical targets [4]. Understanding how individual LS neurons  
568 integrate the thousands of synaptic inputs they receive from these hippocampal pyramidal  
569 neurons will be critical to understanding how the hippocampal map is processed downstream.  
570 Through the process of synaptic integration, a target neuron can fire an action potential upon  
571 receiving sufficient temporally coincidental excitatory input on its dendrites. The activation  
572 of a LS neuron could thus require multiple hippocampal pyramidal cells to spike  
573 simultaneously or in close temporal proximity. Hippocampal pyramidal cells will fire  
574 concomitantly when their place fields are in overlapping regions or in close vicinity of  
575 another. Due to the high interconnectivity of LS GABAergic neurons [88,89], the activation  
576 of one LS cell could subsequently lead to the inhibition of other neurons in the nucleus  
577 [24,90], thereby reducing noise. Thus, through this process of coincidence detection and  
578 recurrent inhibition, the spatial map could converge to be represented by a much lower  
579 number of cells. As such, the LS could accurately convey hippocampal information to  
580 downstream regions using a much more distributed code, and thereby support more effective  
581 information transmission and associative learning [91,92].

582 Finally, our tracing work shows LS cells receiving hippocampal inputs from principal  
583 cells in dorsal CA1 and CA3 in turn project directly to the LH and the MS. Although the  
584 existence of an LS-MS projection has long been debated [5,26,66,68,93], we observed both  
585 dense innervation at the level of the MS after transduction of dCA1-input and dCA3-input  
586 receiving LS cells, as well as synaptic densities between the LS and MS. This suggests that

587 principal cells of the hippocampus send indirect projections to the MS through LS neurons.  
588 This circuit is complementary to the well-described projections of hippocampal GABAergic  
589 interneurons directly to the MS which may play a key role in theta rhythm generation [94,95].  
590 The MS plays a role in generating and propagating theta rhythms throughout the hippocampal  
591 formation [96–98], which in turn organizes hippocampal place cell activity [99], as well as a  
592 behavioral role in the initiation and velocity of locomotion [100,101]. One hypothesis is that  
593 the information on locomotion-related information reported in specific MS neurons [101]  
594 may originate from the LS. Moreover, we observed a direct projection from CA1 and CA3,  
595 via the LS, to the hypothalamus. This pathway was previously shown by previously using  
596 non-specific monosynaptic anterograde tracing [3], with similar unilateral projection patterns  
597 for CA1 and bilaterally for CA3 as described here. Here we show for the first time that the  
598 same LS neurons that receive inputs from dorsal CA1 and CA3 project directly to the  
599 hypothalamus. The hypothalamus is a highly connected region known for its role in  
600 regulating feeding behaviors [102], arousal and motivation [103], and more recently learning  
601 and memory [104–107]. Additionally, the LH is crucial for the control of locomotion [108–  
602 111] and thought to mediate motivational and goal-directed processes underlying feeding  
603 [12,102,112,113].

604 Together, our findings show that GABAergic cells of the LS may provide the  
605 hypothalamus and MS with information about location, direction, and speed, and therefore  
606 constitute a core node within a distributed spatial memory network. Within this network, the  
607 LS may be necessary for the translation of spatial information to goal-directed or  
608 environmentally appropriate actions necessary for survival.

609

## 610 **Methods**

611



612 **Ethics statement**

613 All procedures were approved by the McGill University and Douglas Hospital Research  
614 Centre Animal Use and Care Committee and in accordance with the Canadian Council on  
615 Animal Care.

616

617 **Animals**

618 Naive mice (8-16 weeks old) were housed individually on a 12-hour light/dark cycle at 22°C  
619 and 40% humidity with food and water ad libitum. All experiments were carried out during  
620 the light portion of the light/dark cycle. Both male and female mice were used for this study.

621

622 **Virus injections**

623 Mice, 8-16 weeks old, were anesthetized with isoflurane (5% induction, 0.5-2% maintenance)  
624 and placed in a stereotaxic frame (David Kopf Instruments). Body temperature was  
625 maintained with a heating pad, and eyes were hydrated with gel (Optixcare). Carprofen (10  
626 ml/kg) was administered subcutaneously. All viral injections were performed using a glass  
627 pipette connected to a Nanoject III (Drummond) injector at a flow rate of 1 nL/second. All  
628 stereotaxic coordinates are taken from Bregma (in mm). After surgery, animals were  
629 continuously monitored until recovery. For three days after surgery, mice were provided with  
630 a soft diet supplemented with Carprofen for pain management (MediGel CPF, ~5mg/kg/day).

631

632 *Virus-mediated expression of genetically encoded calcium indicator*

633 Adeno-associated virus (AAV) of serotype 9 containing the genetically encoded calcium  
634 indicator (GECI) 6 fast (GCaMP6f) under a flex promoter was obtained from the University  
635 of Pennsylvania Vector Core (AAV2/9.Syn.Flex.GCaMP6f.WPRE.SV40, CS0641, Penn  
636 Vector Core via Addgene). Lateral septum viral injections were targeted at the following

637 coordinates: Anterior LS, AP: 0.86; ML: 0.35; DV: -3.0; Intermediate LS, AP: 0.38; ML:  
638 0.35; DV: -2.7, Posterior LS, AP: 0.10; ML: 0.35; DV: -2.5, with DV + or - .2 to adjust for  
639 more dorsal or ventral placement of injection. Lateral septum injections were done in VGAT-  
640 IRES-Cre transgenic mice ( $Slc32a1^{tm2(cre)Low1}/J$ , JAX stock #016962). For hippocampal  
641 principal cell imaging, C57Bl/6J mice (JAX stock #000664) were injected with a viral vector  
642 specifically targeting GCaMP6f expression to CaMKII-positive cells  
643 (AAV5.CamKII.GCaMP6f.WPRE.SV40, Penn Vector Core via Addgene, CS1024).  
644 GCaMP6f injections were targeted at the following coordinates: CA1, AP: -1.8; ML: 1.5;  
645 DV: -1.5; CA3, AP: -2.1; ML: 2.3; DV: -2.2. Three of CA3 animals were Grik4-Cre  
646 transgenic mice (C57BL/6-Tg(Grik4-cre)G32-4Stl/J, JAX stock #006474), restricting  
647 GCaMP6f expression to the pyramidal cells of CA3 specifically.

648

#### 649 *Retrograde tracing*

650 Retrograde tracing studies were done using a Cre-dependent retrograde Rabies tracing  
651 approach. Briefly, 100 nL of helper virus (AAVdj.hSyn.Flex.TVA.P2A.eGFP.2A.oG,  
652 NeuroPhotonics Center, Laval, Canada; [114,115]) was injected in the LSd (coordinates as  
653 above) of VGAT-IRES-Cre transgenic mice (n = 5 animals,  $Slc32a1^{tm2(cre)Low1}/J$ , JAX stock  
654 #016962). Cre specificity was tested by the NeuroPhotonics center. After 4 weeks of  
655 incubation time to allow for the complete expression of the helper virus, 200 nL of  
656 inactivated EnvA pseudotyped rabies virus coupled to mCherry was injected (RABV-EnvA-  
657 deltaG-mCherry, NeuroPhotonics Center) at the same coordinates as the helper virus  
658 injection, and brains were collected 7 days later.

659

#### 660 *Anterograde transsynaptic tracing*

661 To distinguish synaptic targets from passing projection fibers of dCA1 and dCA3 within the  
662 LS, C57Bl/6J mice (JAX stock #000664) received a bilateral injection of transsynaptic Cre-  
663 inducing anterograde virus (AAV1-hSyn-Cre-WPRE-hGH, Penn Vector Core via Addgene,  
664 V24784) mixed with a Cre-dependent tdTom-expressing reporter virus to visualize injection  
665 sites (AAV2-Ef1a-flex-tdTomato, NeuroPhotonics Center, AAV602) in a 3:1 ratio, 80 nL  
666 total injection volume per hemisphere (n = 5 mice per group). Injections were targeted at the  
667 following coordinates: CA1: AP: -1.86; ML: 1.5; DV: -1.5; CA3: AP: -2.1; ML: 2.3; DV: -  
668 2.2. Following 1 week of incubation time, animals received a bilateral injection of a Cre-  
669 dependent anterograde vector in LS expressing enhanced yellow fluorescent protein (400 nL,  
670 bilateral, AP: 0.5; ML: 0.35; DV: -2.6, AAVdj-DIO-Cheta-eYFP, NeuroPhotonics Center,  
671 AAV938). Brains were collected and processed three weeks post-injection.

672

### 673 *Synaptag tracing*

674 To verify presence of synaptic connections at the level of the LS-MS projection, AAVdj-  
675 hSyn-flex-mRuby2-syp-eGFP construct (lot AAV799, NeuroPhotonics Center; Oh et al.,  
676 2014) was injected in the LS of CaMKII $\alpha$ -Cre mice (B6.Cg-Tg(Camk2a-cre)T29-1Stl/J, JAX  
677 stock #005359), with 100 nL total injection volume injected at 1 nL/second (unilateral, AP:  
678 0.5; ML: 0.35; DV: -2.7). After 4 weeks of incubation time, animals were perfused, and  
679 brains were processed as described below.

680

### 681 **GRIN lens implant and baseplate**

682 Two to four weeks post GCaMP6f injection, a 0.5 mm diameter gradient refractive index  
683 (GRIN, Inscopix) lens was implanted above LS, dorsal CA1 or CA3, or a 1.8 mm GRIN  
684 (Edmund Optics) lens was implanted above dorsal CA1. For .5 mm LS lens implant, the lens  
685 was glued to an aluminium baseplate prior to the surgery, which provided two main

686 advantages: 1) it allowed us to implant the baseplate/lens assembly in one surgery (instead of  
687 separate surgeries) and 2) during the surgery the miniscope (V3, [miniscope.org](http://miniscope.org)) was used to  
688 image for fluorescence while lowering the lens. The mouse was anesthetized with isoflurane,  
689 and the skull was cleared. A ~.6 mm diameter hole was drilled in the skull at the level of the  
690 injection site. An anchor screw was placed above the contralateral cerebellum to stabilize the  
691 implant. The baseplate and GRIN combination were attached to the miniscope and together  
692 secured to the stereotaxic frame. After making a leading track using a .5 mm diameter needle,  
693 the implant was lowered in place. While lowering the GRIN lens into the tissue, an increase  
694 in fluorescent signal indicates that the injection site has been reached. Both the GRIN lens  
695 and baseplate were permanently secured using C&B-Metabond (Patterson Dental). A plastic  
696 cap was used to protect the GRIN lens from scratching during the recovery period and in  
697 between recording sessions. The animal was given 4 - 6 weeks of recovery time before  
698 experiments started. LS implants were targeted at the following coordinates: Anterior LS,  
699 AP: 0.86; ML: 0.35; DV: -2.9; Intermediate LS, AP: 0.38; ML: 0.35; DV: -2.65; Posterior  
700 LS, AP: 0.10; ML: 0.35; DV: -2.45; with DV + or - .2 to adjust for dorsal, ventral or  
701 intermediate targets; CA3 implants were targeted at AP: -2.1; ML: 2.2; DV: -2.2.

702 For 1.8 mm GRIN lens implantation, a ~2 mm diameter cranial window was prepared.  
703 Again, an anchor screw was used to secure the implant in place. After removing the dura, a  
704 portion of the cortex above the injection site was gently aspirated using a vacuum pump  
705 without applying pressure on the underlying hippocampal tissue. The 1.8 mm GRIN lens was  
706 lowered at the following coordinates: AP: -1.8; ML: 1.5; DV: -1.8. The GRIN lens was  
707 permanently attached to the skull using Metabond, and Kwik-Sil (World Precision  
708 Instruments) silicone adhesive was placed on the GRIN to protect it. On average 4 weeks  
709 post-implant, the silicone cap was removed and CA1 was imaged using a miniscope mounted  
710 with an aluminium base plate while the mouse was under light anesthesia (~0.5 % isoflurane)

711 to allow the visualization of cell activity. When a satisfying field of view was found (large  
712 number of neurons, visible landmarks), the baseplate was cemented above the GRIN lens and  
713 a protective cap was used to protect the GRIN from scratches. Imaging would start  
714 approximately 1 week after baseplating.

715

### 716 **Miniscope recordings**

717 The animals were habituated by being gently handled for ~5 min per day for 3 days. Animals  
718 were then water or chow-scheduled (2h access per day). Miniscope recordings performed at  
719 30 Hz for 15 minutes, with just one recording session per day to minimize photobleaching.  
720 For open field recordings, animals were freely foraging for randomly placed 10% sucrose or  
721 10% sweetened condensed milk in water rewards.

722 Recording environments consisted of a 45 x 45 cm dark grey open field with visual  
723 cues, or a 49 x 49 cm white plexiglass open field, which was placed in different recording  
724 chambers. For linear track recordings, rewards (30 ul of 10% sucrose water) were placed at  
725 each end of the 100 cm linear track, or a 130 cm linear track, and the mouse had to consume  
726 one reward before getting the next one delivered. To ensure that all animals received the  
727 same amount of exposure, for analysis of spatial and self-motion modulation, only recordings  
728 were included from the first time the animal spent time in the open field.

729 For analysis of modulation by food zones or objects, animals were placed again in the,  
730 now familiar, open field on day 1, 3 and 5. On day 2 and 4, food zones or objects were added  
731 in opposing corners of the familiar open field without changing any of the existing visual  
732 cues. Food zones or objects were visible to the animal. Time spent in the region of interest  
733 was computed by taking all timestamps in which animals had their nose within less than 2 cm  
734 from the edge of the food zone or the object.

735 Non-match to place paradigm: Mice were water scheduled (2 h per day) and trained in  
736 an automatized T-maze (MazeEngineers) to a non-match to place task. Briefly, each trial was  
737 divided into two distinct phases: sample and test. In the initial sample phase, a randomly  
738 selected arm was blocked, which forced mice to explore the opposite arm where the animal  
739 received a 10% sucrose water reward. After consuming the reward, animals would return to  
740 the start box for the test phase, during which both arms could be explored. In the test phase,  
741 only the previously unexplored arm is baited, so that mice have to alternate locations between  
742 sample and test phases. Mice were subjected to 10 trials (sample + test) per day, for 10  
743 consecutive days, and calcium activity in LS was recorded on all days. Data provided in S11  
744 Fig are from Day 10 of training.

745

#### 746 **Miniscope and behavior video acquisition**

747 Miniscopes (V3 and V4, miniscope.org) were assembled using open-source plans as  
748 described previously (miniscope.org) [116,117]. Imaging data were acquired using a CMOS  
749 imaging sensor (Aptina, MT9V032) and multiplexed through a lightweight coaxial cable.  
750 Data was acquired using a data acquisition (DAQ) box connected via a USB host controller  
751 (Cypress, CYUSB3013). Animal behavior was recorded using a webcam mounted above the  
752 environment. Calcium and behavioral data were recorded using Miniscope custom  
753 acquisition software. The DAQ simultaneously acquired behavioral and cellular imaging  
754 streams at 30 Hz as uncompressed .avi files (1000 frames per file), and all recorded frames  
755 were timestamped in order to perform the subsequent alignment.

756

#### 757 **Histology**

758 After completion of all experiments, animals were deeply anesthetized with  
759 ketamine/xylazine/acepromazide (100, 16, 3 mg/kg, respectively, intraperitoneal injection).

760 Mice were then transcardially perfused with 4% paraformaldehyde in PBS (PFA). Brains  
761 were extracted and postfixed in PFA at 4 °C for a minimum of 48 hours. Brains were  
762 sectioned at 50 µm using a vibratome and cryoprotected in a solution of 30% ethylene glycol,  
763 30% glycerol and 40% PBS until used.

764

### 765 **Immunohistochemistry**

766 Sections were washed 3 x 20 min in PGT (0.45% Gelatin and 0.25% Triton in 1x PBS) at  
767 room temperature. Next, primary antibodies (1:1000 goat anti-GFP from Novus Biologicals  
768 or 1:10 000 rabbit anti-RFP from VWR (Rockland) were incubated with PGT overnight at  
769 4°C. Following 10, 20, and 40 min washes in PGT, sections were incubated with secondary  
770 antibodies (1:1000 donkey anti-goat coupled to A488 or 1:1000 donkey anti-rabbit coupled to  
771 A555, both from Molecular Probes) in PGT at room temperature for 1 hour. Sections were  
772 subsequently washed for 10 and 20 minutes in PGT and 30 minutes in PBS. Sections were  
773 then mounted on glass slides and permanently coverslipped with Fluoromount that contained  
774 DAPI.

775

### 776 ***In-vitro* patch clamp electrophysiology**

777 Mice were deeply anesthetized and acute brain slices were obtained following the protective  
778 recovery method [118]. Briefly, mice were transcardially perfused with N-methyl-D-  
779 glutamine (NMDG-based) solution containing (in mM): 93 NMDG, 93 HCl, 2.5 KCl, 1.2  
780 NaH<sub>2</sub>PO<sub>4</sub>, 30 NaHCO<sub>3</sub>, 20 HEPES, 25 glucose, 5 sodium ascorbate, 2 thiourea, 3 sodium  
781 pyruvate, 10 MgSO<sub>4</sub> and 0.5 CaCl<sub>2</sub>, (pH 7.4, oxygenated with carbogen). The brain was then  
782 quickly extracted and coronal slices (300 µm) were cut using a vibrating microtome (Leica-  
783 VT1000S). Slices were incubated for 10–12 min in 32°C NMDG solution before being  
784 transferred to a holding chamber filled with artificial cerebrospinal fluid (aCSF), kept at room

785 temperature and containing (in mM): 124 NaCl, 24 NaHCO<sub>3</sub>, 2.5 KCl, 1.2 NaH<sub>2</sub>PO<sub>4</sub>, 5  
786 HEPES, 12.5 glucose, 2 MgSO<sub>4</sub>, and 2 CaCl<sub>2</sub>, (pH 7.4, oxygenated with carbogen). For  
787 electrophysiology, slices were transferred to a submerged recording chamber perfused with  
788 aCSF (3 ml /min flow rate, 30 °C). Patch-clamp recordings were obtained from LS  
789 GABAergic (VGAT-positive) neurons expressing the fluorescent marker GFP and visualized  
790 using a 40x water immersion objective on an upright Olympus microscope. Recordings were  
791 performed and analysed using an Axon Multiclamp 700B amplifier and the Clampfit10  
792 software (Molecular Devices). The intrapipette solution contained (in mM) 126 K-gluconate,  
793 4 KCl, 10 HEPES, 4 Mg<sub>2</sub>ATP, 0.3 Na<sub>2</sub>GTP, and 10 PO-Creatine, adjusted to pH 7.25 with  
794 KOH (272 mosm). Pipette resistance was 4-6MΩ.

795

#### 796 **Calcium imaging analysis**

797 Calcium imaging videos were analyzed using the Miniscope Analysis pipeline  
798 (<https://github.com/etterguillaume/MiniscopeAnalysis>) as described previously [47]. Non-  
799 rigid motion correction was applied using NoRMCorre [119], and videos were spatially  
800 downsampled (3x) before concatenation. Calcium traces were extracted using CNMFe [120]  
801 using the following parameters: gSig = 3 pixels (width of gaussian kernel), gSiz = 20 pixels  
802 (approximate neuron diameter), background\_model = 'ring', spatial\_algorithm = 'hals',  
803 min\_corr = 0.8 (minimum pixel correlation threshold), min\_PNR = 8 (minimum peak-to-  
804 noise ratio threshold). After extraction, cells and traces were visually inspected, and cells  
805 with low signal to noise ratio were removed. Raw calcium traces were filtered to remove  
806 high-frequency fluctuations and binarized (normalized amplitude > 2 sd and the first-order  
807 derivative > 0) [47].

808 Mouse position and head orientation was tracked using a DeepLabCut [121,122]  
809 model trained on several mouse pose markers including head centroid (for position) and nose



810 tip (used to compute head direction angle, see below). Velocity was extracted by dividing  
811  $\Delta d/\Delta t$  where  $d$  is the distance and  $t$  is time, and subsequently smoothed using a gaussian filter  
812 with  $\sigma = 33$  ms to remove movement artefacts. Acceleration was computed by  
813 differentiating (Matlab function *diff*) velocity. Head direction was computed as the angle  
814 between the vertical axis and the line formed by the head centroid and nose tip. Location data  
815 was interpolated to calcium imaging sampling frequency using linear interpolation. Head  
816 directions were interpolated using the same method, but direction data was first unwrapped,  
817 interpolated and converted back into radians.

818

### 819 **Activity and bursting index**

820 Following the binarization of raw calcium traces, we compute the probability of a neuron to  
821 be active  $P(A)$  using the following formula:

$$P(A) = \frac{\text{time active}}{\text{total time}}$$

822 The bursting index was computed as the probability of a cell being active, given it was  
823 already in an active state, or  $P(\text{Active}, t \mid \text{Active}, t-1)$ . The activity index is computed as the  
824 probability of a cell becoming active when it is in an inactive state, or  $P(\text{Active}, t \mid \text{Inactive}, t-$   
825  $1)$ .

826

### 827 **Spatial modulation**

828 Before processing, input variables were binned (Position in open field: 17 x 17 bins of 3 x 3  
829 cm; Position in linear track: 34 bins of 3 cm; velocity,  $\min = 2.5$  cm/s,  $\max = 30$  cm/s, 20  
830 bins; acceleration:  $\min = -2$  cm/s<sup>2</sup>,  $\max = +2$  cm/s<sup>2</sup>, 20 bins; head direction: 40 bins of 9°).  
831 Velocity was smoothed over thirty frames to reduce discontinuities. For head direction and  
832 positional information, all frames where velocity was  $< 5$  cm/s were excluded. The probability  
833 of being active  $P(A)$  informs on the activity rate of a neuron. Next, we compute the

834 probability of spending time in a given bin  $i$  (spatial, velocity, acceleration or head direction  
835 bin).

$$P(S_i) = \frac{\text{time in bin } i}{\text{total time}}$$

836 Next, we compute the joint probability:

$$P(S_i \cap A) = \frac{\text{time active while in bin } i}{\text{total time}}$$

837 And the probability that a cell is active given the animal is in a bin:

$$P(A | S_i) = \frac{\text{time active while in bin } i}{\text{time in state}}$$

838 After plotting the binarized activity in space, we perform  $n = 1000$  random circular  
839 permutations. Circular permutations are used to remove the temporal relationship between  
840 neuronal activity and behavior, but it preserves the temporal structure of calcium transients  
841 and therefore leads to more conservative results (as opposed to complete randomization of  
842 every data point, which inflates the significance value of results). Because shuffled surrogates  
843 were not systematically normally distributed, we used a non-parametric approach where the  
844  $p$ -value corresponds to the number of datapoints from the shuffled distribution that are  
845 greater than the actual data for each bin, divided by the number of permutations [123]. A  
846 threshold of  $p < .01$  is used to determine the significant data points that make up a significant  
847 place field. In our case, for a cell to be considered spatially modulated, at least one of the  
848 spatial bins must contain activity that is significantly non-random. To compute within-session  
849 stability, the halfway point in the recording was determined by taking the timestamps where  
850 half of the total number of binarized events for the session was reached. Tuning maps were  
851 computed for both the first and second half of the session using the methodology described  
852 above. A Gaussian smoothing filter ( $\sigma = 3$ ) was used to smooth the tuning maps before  
853 computing a correlation between the two. A within-session correlation value of  $>.5$  was  
854 considered a stable field.

855

## 856 **Calculating mutual information content**

857 Mutual information is used to describe the amount of information about one variable (spatial  
858 location, head direction, velocity or acceleration) through the observation of neuronal  
859 activity, and was calculated using the following formula:

$$860 \quad MI = \sum_{i=1}^M \sum_{j=1}^2 P(S_i \cap A_j) \times \log_2 \left( \frac{P(S_i \cap A_j)}{P(S_i) \times P(A_j)} \right)$$

861 Where  $M$  is the total number of possible behavioral states,  $P(S_i \cap A_j)$  is the joint probability of  
862 the animal being in bin  $i$  concurrently with activity level  $j$ . As we are using binarized activity,  
863  $j$  can only be active or inactive. MI was calculated using 30 bootstrapped surrogates using 50  
864 percent of the data (randomly chosen data points) with replacement, to allow for computation  
865 of mean MI and SEM. Next, the trace was circularly shuffled in order to calculate a shuffled  
866 MI and SEM. Cells were then sorted along with the magnitude of the difference between  
867 mean MI and mean shuffled MI, and a two-way ANOVA with a  $p < .01$  threshold was used  
868 to determine whether the difference between the two numbers was significant in order for the  
869 cell to be deemed significantly spatially modulated. In case the assumptions for parametric  
870 ANOVA are not met (normal distribution, variance homogeneity), the significance value was  
871 computed by taking the sum of the shuffled MI values of greater magnitude than actual MI  
872 values, divided by the number of shuffles.

873

## 874 **Bayesian decoding**

875 A Bayesian decoder was used to evaluate how well LS neural activity estimated the animal's  
876 location as compared to neural activity recorded from dorsal CA1 and CA3. We used  
877 decoding methods specifically adapted for calcium imaging data with binarized calcium  
878 transients [47]. Using only epochs with velocity  $> 5$  cm/s, a training dataset was generated

879 using 50% of the data. The remaining 50% of the data was used for testing. Decoding  
880 efficiency (as measured by a decoding error and a decoding agreement score as outlined  
881 below) was calculated using 30 bootstrapped surrogates using randomly chosen data points  
882 with replacement, to allow for computation of mean MI and SEM. In order to allow for fair  
883 comparison between recordings with different numbers of cells recorded, this approach was  
884 done using either 40, 60, 80 or 100 randomly chosen cells with replacement for each  
885 bootstrapped sample. The posterior probability density function, which is the probability that  
886 an animal is in a particular bin  $S_i$ , given the neural activity  $A$  is calculated using the  
887 following equation:

$$P(S_i | A) = \frac{P(A | S_i) \times P(S_i)}{P(A)}$$

888  $P(S|A)$  is the posterior probability distribution of states given neuronal activity. No prior  
889 assumption is made about the location of the mouse on the linear track,  $P(S)$  is kept uniform  
890 to attribute equal probability for each location. Every neuron is assumed to be independent of  
891 each other. To construct the tuning curves from multiple neurons, we use the following  
892 equation:

$$P(S | A) = \prod_{k=1}^N \frac{P(A_k | S) \times P(S)}{P(A_k)}$$

893 With  $P(S|A)$  a vector of *a posteriori* behavioral states and  $N$  corresponding to the number of  
894 neurons used. For every neuron  $k$  the tuning curves are constructed, and corresponding  
895 posterior location probability can be derived.

896 To reconstruct the position of the mouse, we will consider the location associated with  
897 the maximum a posteriori:

$$\hat{y} = \arg \max \exp \left[ \sum_{k=1}^N \log \left( 1 + \frac{P(A_k | S) \times P(S)}{P(A_k)} \right) - 1 \right]$$

898 With the estimated state among all possible states  $S$ . We used a temporal filtering window in  
899 the open field of 1.5 seconds and in the linear track of 0.5 seconds to remove erratic jumps in  
900 the decoded position of the mouse. Decoding accuracy was measured as 1) decoding error  
901 and 2) decoding agreement. In one-dimensional space, decoding error was assessed as

$$\text{decoding error} = | \text{decoded position} - \text{actual position} |$$

902 In two-dimensional space, decoding error was assessed as

$$\text{decoding error} = (\sqrt{\text{actual position} - \text{decoded position}})^2$$

904 Decoding score was computed as

$$\text{decoding score} = \frac{\text{mean}(\text{shuffled decoding error}) - \text{mean}(\text{decoding error})}{\text{length of track}}$$

905 Decoding agreement was defined as the portion of time where the exact location or head  
906 direction bin was successfully decoded:

$$\text{decoding agreement} = \frac{\text{time points successfully decoded}}{\text{total time}}$$

907

### 908 **Tracking cells across sessions**

909 Neurons were tracked over multiple days using a probabilistic method as previously  
910 described [124]. Briefly, spatial footprints were aligned using non-rigid alignment  
911 (transformation smoothness = 2) to correct for brain tissue displacements or miniscope  
912 placement. After alignment, we considered candidate sets of cells to be the same neuron if  
913 their maximal distance was  $< 12 \mu\text{m}$ , and the spatial correlation between sets of cells was  $>$   
914  $.65$ . Next, we visually identified candidate cell pairs across sessions and manually deleted  
915 those cell pairs that were erroneously selected ( $< 1\%$  of cases). We assessed the stability of  
916 the spatial representation in LS using simple field correlation, which was assessed by  
917 correlating smoothed place fields of cell pairs. To generate the null hypothesis for place

918 fields' displacements between pairs of days, we used the place fields tuning maps but shuffled  
919 cell identities over days (30 shuffles).

920

### 921 **Materials availability**

922 This study did not generate new unique reagents.

923

### 924 **Data and Code availability**

925 All data used for main and supplemental figures are publicly available at [insert DOI from  
926 Gnode]. Code for cell extraction is available at  
927 <https://github.com/etterguillaume/MiniscopeAnalysis>. Code for behavior extraction is  
928 available at <https://github.com/etterguillaume/PIMPIN>. Code for extraction of tuning curves  
929 and decoding were adapted from [47] and can be downloaded at the following address:  
930 <https://github.com/etterguillaume/CalMDecoding>. All other code is available at  
931 <https://github.com/suzannevdveldt/spatialcodingLS>.

932

### 933 **Statistics**

934 Statistics Statistical analyses were performed using Matlab (Mathworks) and GraphPad Prism  
935 version 6.00 (GraphPad Software, La Jolla, California USA). All data are presented as mean  
936  $\pm$  standard error of the mean (SEM) and statistical test details are described in the  
937 corresponding results. All t-tests are two-tailed. Normality distribution of each group was  
938 assessed using the Shapiro-Wilk normality test and parametric tests were used only when  
939 distributions were found normal, using Student's t-tests, one-way ANOVA or two-way  
940 ANOVA. For non-normal distributions, non-parametric tests Mann-Whitney or Kruskal-  
941 Wallis tests were performed and described where applicable. Significant main effects or  
942 interactions were followed up with appropriate post hoc testing using Bonferroni corrections

943 were applicable.  $p < 0.05$  was considered statistically significant, or  $p < .01$  and described  
944 where applicable \*,  $p < 0.05$ ; \*\*,  $p < 0.01$ ; \*\*\*,  $p < 0.001$ , \*\*\*\*,  $p < 0.0001$ .

945

#### 946 **Funding**

947 This work was supported by funding from the Canadian Institutes for Health Research  
948 (CIHR), Fonds de la Recherche en Santé du Québec (FRSQ), and the Natural Sciences and  
949 Engineering Research Council of Canada (NSERC). SVDV is supported by a Vanier Canada  
950 Graduate Scholarship and the Richard H. Tomlinson Doctoral Fellowship. C-AM is  
951 supported by a FRQS fellowship.

952

#### 953 **Acknowledgments**

954 We thank Fernanda Sosa for help with behavioral recording experiments, training of the  
955 animals, immunohistological experiments and quantifications. Alexandra T. Keinath for  
956 valuable comments on a previous version of the manuscript, and Ke Cui for help with colony  
957 maintenance and mice perfusions. We also thank Daniel Aharoni (UCLA) for guidance in  
958 using the UCLA miniscope and Bruno Rivard for help building the miniscopes. The present  
959 study used the services of the Molecular and Cellular Microscopy Platform at the DHRC.

960

#### 961 **Competing interests**

962 The authors declare no competing interests.

963

#### 964 **Supplemental figures**

965 **S1 Fig: LS receives direct inputs from the pyramidal cells of the hippocampus.**

966 (A) Strategy for retrograde rabies tracing in LS. (B) Mean proportion of cells found in the  
967 hippocampus for each 300 $\mu$ m coronal section; two-way RM ANOVA,  $F(24, 126) = 2.738$ ,  $p$

968 = 0.002, interaction effect, n = 5 mice. (C) Coronal section of ventral hippocampal region,  
969 showing retrogradely labelled cell bodies in subiculum, CA1 and CA3. (D) Retrogradely  
970 labelled cell bodies in the *fasciola cinereum* (FC). (E) Retrogradely labelled cells in the  
971 ventral tegmental area (VTA). (F) Bilateral labelling of the hypothalamic region. (G) Cell  
972 bodies in the periaqueductal grey. (H) Total number of starter cells for each LS subregion,  
973 ANOVA,  $F(2,12) = 24.61$ ,  $p > .0001$ . Scale bars: C, left: 500  $\mu\text{m}$ , right: 300  $\mu\text{m}$ . D, 200  $\mu\text{m}$ .  
974 E, 500  $\mu\text{m}$ , F, 500  $\mu\text{m}$  and G, 400  $\mu\text{m}$ . \*,  $p < .05$ , \*\*,  $p < .01$ , \*\*\*,  $p < .001$ , ns = not  
975 significant. Test used in B, one-way ANOVA. Sub = subiculum, FC = fasciola cinereum, Aq  
976 = aqueduct, mtg = mammillotegmental tract, VTA = ventral tegmental area, MM = medial  
977 mammillary nucleus, PH = posterior hypothalamic area, 3V = third ventricle, LH = lateral  
978 hypothalamus, f = fornix, PAG = periaqueductal grey.

979

## 980 **S2 Fig: Histological verification of CA1 implant location.**

981 (A) Examples for CA1 animals included in 1D spatial navigation task, with Cre-dependent  
982 GCaMP6f (green) in a CaMKII $\alpha$ -Cre mouse with DAPI counterstaining (blue). (B)  
983 Corresponding spatial footprints (SFPs) from extracted cells, color coded for minimum to  
984 maximum mutual information value. (C) Example of approach to compute the correlation  
985 between mutual information and position on the X-axis, linear regression  $R^2 = 0.005682$ ,  $p =$   
986 2678. (D) Summary of all  $R^2$  values for n = 5 mice.

987

## 988 **S3 Fig: Histological verification of CA3 implant location.**

989 (A) Coronal section of dorsal hippocampal region, showing location of GRIN lens implant.  
990 Left: Animals implanted trans-hippocampally. Right: Animals implanted with an  
991 extrahippocampal approach. (B) Coronal sections from anterior to progressively more  
992 posterior regions of the hippocampus, showing extent of damage for a 500  $\mu\text{m}$  lens implant.



993 (C) Comparison between mutual information and probability being active for spatially  
994 modulated cells recorded in animals with trans-hippocampal versus extra-hippocampal  
995 implants (MI: unpaired t-test,  $t(64) = 0.0367$ ,  $p = 0.9708$ ; P(A): unpaired t-test,  $t(51) = .3908$ ,  
996  $p = 6875$ ; extra-hipp:  $n = 22$  cells from 2 animals, trans-hipp:  $n = 44$  cells from 3 animals).

997

998 **S4 Fig: GABAergic cells in the lateral septum are significantly spatially modulated in a**  
999 **1D environment.**

1000 (A) Example of raw calcium fluorescence trace (top), and binarized events (green, bottom).  
1001 Trace is divided into early and late recording epochs using 50% of total calcium (using the  
1002 area under the curve). Inset: zoomed calcium trace with binarized traces. (B) Linear  
1003 correlation between MI and probability being active (linear regression,  $R^2 = 0.5006$ ,  $p <$   
1004  $.0001$ ,  $n = 1030$  cells from  $n = 15$  mice). (C) Method for computing the MI and 95%  
1005 confidence interval from bootstrapped samples (left) and 30x shuffled surrogates (right). (D)  
1006 MI computed from actual traces (black) and shuffled traces (red), sorted by the magnitude of  
1007 the difference between these values, two-way ANOVA,  $F(1029,59740) = 126.3$ ,  $p < .0001$  for  
1008 interaction effect. Left inset: zoomed version first 20 cells. Right inset: zoomed version for 20  
1009 not significant cells. (E) Scatterplot for significance level for spatial modulation and  
1010 probability being active (linear regression,  $R^2 = .0145$ ,  $p = 0.007$ ,  $n = 1030$  cells,  $n = 15$   
1011 mice). (F) Group averages of actual (grey) versus shuffled (red) MI for spatially modulated  
1012 LS cells recorded on linear track (Mann-Whitney test,  $U = 116394$ ,  $p < .0001$ ). (G) LS group  
1013 averages of spatial cells (grey) versus non-spatial cells (red) for split half stability (Mann-  
1014 Whitney test,  $U = 17743$ ,  $p < .0011$ ). (H) Examples of significantly spatially modulated cells  
1015 representative for each rank, as ranked according to panel C. \*,  $p < .05$ , \*\*\*\*,  $p < .0001$ .

1016

1017 **S5 Fig: Intrinsic properties and firing frequency in GABAergic neurons of the lateral**  
1018 **septum and parvalbumin-positive (PV) fast-spiking interneurons of the hippocampus.**

1019 (A) VGAT-cre mice were injected with AAVdj-Flex-GFP in LS and patch-clamp whole cell  
1020 recordings were performed from fluorescent neurons of the dorsal LS. (B) Representative  
1021 photos showing the localization of Cre-dependent fluorescence and VGAT-positive neurons  
1022 two weeks after bilateral micro-injections at LS coordinates. Scale bar: 200, 200, 10  $\mu\text{m}$ ,  
1023 (asterisk marks the location of a patched cell). (C) Current-clamp traces from an GFP positive  
1024 LS neuron (shown in b) characterized using depolarizing current injection steps (0-200pA).  
1025 (D) Sample traces showing hyperpolarizing and depolarizing responses from a fast-spiking  
1026 (PV) hippocampal interneuron. (E) Plot of mean firing frequencies in response to injected  
1027 currents of increasing supra-threshold amplitudes in hippocampal PV interneurons (open  
1028 circles) and LS VGAT neurons (solid squares). Current injections were 600 ms square pulses.  
1029 Firing-frequencies are plotted from threshold current ( $t$ ) to  $t + 220$  pA (two-way ANOVA  
1030 with Bonferroni's multiple comparison test,  $F(11, 154) = 21.74$ ,  $p < .0001$  for interaction  
1031 effect). \*,  $p < .05$ , \*\*\*,  $p < .001$ , \*\*\*\*,  $p < .0001$ .

1032

1033 **S6 Fig: High proportion of spatially modulated cells in LS is not caused by differences**  
1034 **in probability being active.**

1035 (A) Probability being active for all cells recorded for each group (Kruskal-Wallis,  $H(3) =$   
1036  $502.0$ ,  $p < .0001$ ; LS:  $n = 1030$  cells,  $n = 15$  mice. CA1:  $n = 1251$  cells,  $n = 5$  mice, CA3:  $n =$   
1037  $464$  cells,  $n = 6$  mice). (B) Histogram of probabilities being active for all groups (C)  
1038 Histogram of MI values for all cells recorded in LS, CA1 and CA3. (D) Using a cut-off of  
1039  $P(A) > .001$  to exclude cells of low activity levels, comparison of proportion of spatially  
1040 modulated cells for each region (left, Kruskal-Wallis,  $H(3) = 59.57$ ,  $p = .0509$ , LS:  $n = 15$   
1041 mice. CA1:  $n = 5$  mice, CA3:  $n = 6$  mice) and average split half stability for spatially

1042 modulated cells (right, Kruskal-Wallis,  $H(3) = 80.48$ ,  $p < 0.0001$ , LS:  $n = 475$  cells,  $n = 15$   
1043 mice, CA1:  $n = 363$  cells,  $n = 5$  mice, CA3:  $n = 142$  cells,  $n = 5$  mice) . \*\*\*\*,  $p < .0001$ .

1044

1045 **S7 Fig: Lateral septum spatially modulated cells are significantly directionally**  
1046 **modulated.**

1047 (A) Mouse location on day 5 of linear track training, divided in left runs (orange) and right  
1048 runs (light blue) with corresponding raw calcium activity (middle, dark blue) and derived  
1049 binary trace (bottom, yellow). (B) Probability of cell being active for left (orange) versus  
1050 right trajectories (blue), and corresponding mutual information calculated separately for left  
1051 and right runs. (C) Corresponding locations where binarized activity was detected (orange for  
1052 left trajectories, blue for right trajectories and black for all trajectories). (D) MI values for  
1053 right versus left trajectories ranked by magnitude of the difference between the two. Dotted  
1054 line  $p < .01$  significance level used to assess spatial modulation of cells, two-way ANOVA,  
1055  $F(489,28420) = 496.9$ ,  $p < .0001$  for interaction effect. (E) Proportion of spatially modulated  
1056 cells in LS that are right-selective (blue, 22.08%), left-selective (orange, 15.52%), spatially  
1057 modulated but not directionally modulated (red, 7.67%) and non-spatially modulated (grey,  
1058 54.71%, left), CA1 (middle) and CA3 (right).

1059

1060 **S8 Fig: Decoding using fewer cells still leads to significant differences between**  
1061 **septohippocampal regions and shuffled surrogates in linear track .**

1062 (A) Mean decoding error for location decoding on the linear track using LS cells computed  
1063 for 30 bootstrap samples of 40, 60, 80, or 100 cells (black, each dot represents mean of an  
1064 animal) compared to a decoded location using shuffled tuning maps (red, each dot represents  
1065 mean of an animal), two-way RM ANOVA,  $F(3,19) = 571.4$ ,  $p = 0.0024$  for main effect of  
1066 shuffling,  $F(3,19) = 6.948$ ,  $p = 0.0024$  for main effect of number of included cells. (B) Left:

1067 same as A, for mean decoding agreement, two-way RM ANOVA,  $F(3,19) = 1059, p < .0001$   
1068 for main effect of shuffling,  $F(3,19) = 10.06, p = 0.0003$  for main effect of number of  
1069 included cells, Right: Method for computing the mean decoding agreement for each  
1070 bootstrapped estimate. (C) Same as A, for cells recorded from dorsal CA1. In addition to 30  
1071 bootstrapped samples of 40, 60, 80 and 100 cells, this panel includes mean decoding error  
1072 using all recorded cells, two-way RM ANOVA,  $F(1,20) = 304.3, p < .0001$  for main effect of  
1073 shuffling,  $F(4,20) = 2.647, p = 0.0637$  for main effect of number of included cells. (D) Same  
1074 as A, for cells recorded from dorsal CA3, two-way RM ANOVA,  $F(1,9) = 42.83, p = .0001$   
1075 for main effect of shuffling,  $F(3,9) = 1.480, p = 0.2845$  for main effect of number of included  
1076 cells. (E) Using only cells with  $P(A) > .001$ , decoding error for actual versus shuffled dataset  
1077 using 60 cells (paired t-tests, LS:  $t(5) = .10, p = 0.001, n = 6$  mice; CA1:  $t(4) = 6.732, p =$   
1078  $.0025, n = 5$  mice; CA3:  $t(3) = 2.966, p = .0592, n = 4$  mice). (F) Using only cells with  $P(A)$   
1079  $> .001$ , mean decoding score for each region (one-way ANOVA,  $F(2,12) = 5.765, p = 0.0167$ .  
1080 (G) Same as E, without using a temporal smoothing window (paired t-tests, LS:  $t(6) = 10.08,$   
1081  $p < 0.0001, n = 7$  mice; CA1:  $t(4) = 7.897, p = .0014, n = 5$  mice; CA3:  $t(3) = 2.614, p =$   
1082  $.0794, n = 4$  mice). (H) Same as F, without using a temporal smoothing window (ANOVA,  
1083  $F(2,13) = 5.462, p = .0190$ ). \*,  $p < .05$ , \*\*,  $p < .01$ , \*\*\*,  $p < .001$ , \*\*\*\*,  $p < .0001$ .

1084

1085 **S9 Fig: GABAergic cells in the lateral septum are significantly spatially modulated**  
1086 **during free exploration in a 2D environment.**

1087 (A) Probability  $P(\text{active} | \text{location})$  of an example cell to be active in a bin (3 cm) of the open  
1088 field (45 or 49 cm size). (B) Significance computed from  $n = 1000$  circular permutations,  $p <$   
1089  $.01$  is considered significant. (C) Within session stability is computed by correlation of the  
1090 first half (left) and the second half (right) of the recording. (D) MI computed from actual  
1091 traces (red) and shuffled traces (black), sorted by the magnitude of the difference between

1092 these values (one-way ANOVA,  $F(1898, 110142) = 65.50, p < .0001$  for interaction effect).  
1093 Left inset: zoomed version of first 20 cells. Right inset: zoomed version for 20 not significant  
1094 cells. (E) Cells are ranked according to the difference between their bootstrapped mean  
1095 mutual information (MI) value and 30 circularly shuffled surrogates. Ranks are color-coded  
1096 for clarity,  $n = 1899$  cells from  $N = 28$  mice. (F) Examples of significantly spatially  
1097 modulated cells with corresponding mean MI value (top) and split within-session stability  
1098 (bottom) representative for each rank. (G) Computation of activity index (probability inactive  
1099 to active) and bursting index (probability active to active) . (H) Left: Activity index for  
1100 spatial vs. non-spatial cells (Mann-Whitney test,  $U = 342219, p < .0001$ ). Right: Bursting  
1101 index for spatial versus non-spatial cells (Mann-Whitney test,  $U = 368276, p < .0001$ ).

1102

1103 **S10 Fig: LS spatially modulated cells do not anchor to foodzones or objects.**

1104 (A) Experimental set-up, with animals freely exploring the same open field for 5 consecutive  
1105 days, with two food zones and two objects added in opposing corners on day 2 and 4  
1106 respectively. Representative trajectories are shown in grey. Green circles and stars represent  
1107 locations of food and objects. (B) Representative example of the average number of cells  
1108 active per 3 cm bin for an example mouse (baseline 1:  $n = 132$  cells; food zones:  $n = 110$   
1109 cells; baseline 2:  $n = 118$  cells; objects:  $n = 118$  cells; baseline 3:  $n = 72$  cells). (C) For the  
1110 same animal, red dots are centroids of spatially modulated cells. (D) Centroids for each  
1111 significantly spatially modulated cell of all animals included in analysis (baseline 1:  $n = 730$   
1112 cells,  $n = 10$  mice; food zones:  $n = 559$  cells,  $n = 10$  mice; baseline 2:  $n = 749$  cells;  $n = 10$   
1113 mice; objects:  $n = 407$  cells,  $n = 8$  mice; baseline 3:  $n = 471$  cells;  $n = 8$  mice). (E) Time spent  
1114 in food zone as a percentage of total time spent in session for all animals ( $n = 10$  mice). (F)  
1115 Number of visits to food zone ( $n = 10$  mice). (G) Likelihood of cell being active within the  
1116 food zone as compared to a shuffle for all cells recorded (Wilcoxon matched-pairs signed

1117 rank test,  $W = -3490$ ,  $p = .6497$ ,  $n = 559$  cells,  $n = 10$  mice). (H) Time spent in object zone as  
1118 a percentage of total time spent in session for all animals ( $n = 8$  mice). (I) Number of visits to  
1119 objects ( $n = 8$  mice). (J) Likelihood of a cell being active closely around the objects as  
1120 compared to a shuffle (Wilcoxon matched-pairs signed rank test,  $W = 3789$ ,  $p = .4251$ ,  $n =$   
1121  $407$  cells,  $n = 8$  mice).

1122

1123 **S11 Fig: Significantly spatially modulated cells are not centered around the reward zone**  
1124 **in a non-match to place task**

1125 (A) Schematic of T-maze non-match to place task, consisting of a first forced run, followed  
1126 by a free run in which the previously non-visited arm is rewarded. (B) Example trajectory of  
1127 well-trained animal, with Probability (active | location) of three example cells using 5 cm  
1128 bins. (C) For two example animals, red dots are centroids of spatially modulated cells. (D)  
1129 Time spent in food zone as a percentage of total time spent in session for all animals ( $n = 6$   
1130 mice). (E) Number of visits to reward zone ( $n = 6$  mice). (F) Likelihood of a cell being active  
1131 within the reward zone as compared to a shuffle for all cells recorded (Wilcoxon matched-  
1132 pairs signed rank test,  $W = -4783$ ,  $p = 0.2358$ ;  $n = 365$  cells from  $n = 6$  mice, day 10 of  
1133 training).

1134

1135 **S12 Fig: Differences in spatial coding not due to inclusion of pseudo-silent cells**

1136 (A) Probability of being active for spatially modulated cells (Kruskal-Wallis,  $H(3) = 295.0$ ,  $p$   
1137  $< .0001$ ; Dunn's multiple comparisons test; LS:  $n = 718$  spatial cells from  $n = 28$  mice;  
1138 dCA1:  $n = 323$  spatial cells,  $n = 6$  mice; dCA3:  $n = 138$  spatial cells,  $n = 7$  mice). (B) Left:  
1139 Using an activity cut-off of  $P(A) > .001$ , proportion of spatial cells per animal (one way  
1140 ANOVA,  $F(2,39) = 0.9849$ ,  $p = 0.3826$ ; Tukey's multiple comparisons test; LS:  $n = 1889$   
1141 cells from  $n = 28$  mice; dCA1:  $n = 1017$  cells,  $n = 6$  mice; dCA3:  $n = 521$  cells,  $n = 8$  mice).

1142 Middle: Within session stability for spatial cells (Kruskal-Wallis,  $H(3) = 89.52$ ,  $p < .0001$ ;  
1143 Dunn's multiple comparisons test; LS:  $n = 718$  spatial cells from  $n = 28$  mice; dCA1:  $n = 323$   
1144 spatial cells,  $n = 6$  mice; dCA3:  $n = 138$  spatial cells,  $n = 7$  mice). Right: Mean dispersion for  
1145 spatial cells (Kruskal-Wallis,  $H(3) = 155.5$ ,  $p < .0001$ ; Dunn's multiple comparisons test; LS:  
1146  $n = 718$  spatial cells from  $n = 28$  mice; dCA1:  $n = 323$  spatial cells,  $n = 6$  mice; dCA3:  $n =$   
1147  $138$  spatial cells,  $n = 7$  mice). \*,  $p < .05$ , \*\*,  $p < .01$ , \*\*\*,  $p < .001$ , \*\*\*\*,  $p < .0001$ .

1148

1149 **S13 Fig: Decoding using fewer cells still leads to significant differences between**  
1150 **septohippocampal regions and shuffled surrogates in 2D environment.**

1151 (A) Mean decoding error for location decoding in the open field using LS cells computed for  
1152 30 bootstrapped samples of 40, 60, 80, and 100 cells (black, each dot represents mean of an  
1153 animal) compared to a decoded location using shuffled tuning maps (red, each dot represents  
1154 mean of an animal; two-way RM ANOVA,  $F(1,33) = 174.9$ ,  $p < 0.0001$  for main effect of  
1155 shuffling,  $F(3,33) = 0.2041$ ,  $p = 0.893$  for main effect of number of included cells. (B) Left:  
1156 same as A, for mean decoding agreement (two-way RM ANOVA,  $F(1,33) = 132.8$ ,  $p < .0001$   
1157 for main effect of shuffling,  $F(3,33) = 1.132$ ,  $p = .3505$  for main effect of number of included  
1158 cells). Right: Method for computing the mean decoding agreement for each bootstrap  
1159 estimate. (C) Same as A, for cells recorded from dorsal CA1. In addition to 30 bootstrap  
1160 samples of 40, 60, 80 and 100 cells, panel includes mean decoding error using all recorded  
1161 cells (two-way RM ANOVA,  $F(1,17) = 649.0$ ,  $p < .0001$  for main effect of shuffling,  $F(4,17)$   
1162  $= .7948$ ,  $p = .5447$  for main effect of number of included cells) (D) Same as A, for cells  
1163 recorded from dorsal CA3 (two-way RM ANOVA,  $F(1,11) = 44.13$ ,  $p < .0001$  for main effect  
1164 of shuffling,  $F(3,11) = 17.99$ ,  $p = .9078$  for main effect of number of included cells). (E)  
1165 Effect of temporal filtering on decoding error in the open field for LS (two-way RM  
1166 ANOVA,  $F(1,25) = 123.7$ ,  $p < .0001$  for main effect of shuffling,  $F(4,25) = 0.1169$ ,  $p = .9753$

1167 for main effect of number of included cells. (F) Comparison of mean decoding error using  
1168  $P(A) > .001$  activity cut-off for cell selection versus without such cut off using 80 cells (LS:  $n$   
1169 = 8 mice, CA1:  $n = 4$  mice, CA3:  $n = 4$  mice; two-way RM ANOVA,  $F(1,12) = 1.374$ ,  $p =$   
1170  $2.639$  for main effect of activity cut-off,  $F(2,12) = 1.023$ ,  $p = .3889$ , for main effect of  
1171 structure). \*,  $p < .05$ , \*\*,  $p < .01$ , \*\*\*,  $p < .001$ , \*\*\*\*,  $p < .0001$ , Test used in A-F, two-way  
1172 RM ANOVA.

1173

#### 1174 **S14 Fig: LS place code over days**

1175 (A) Within session stability for each spatially modulated cell recorded cells in LS (Kruskal-  
1176 Wallis,  $H(4) = 8.921$ ,  $p = 0.0304$ ; Dunn's multiple comparisons test; day 1,  $n = 181$ ; day 2,  $n$   
1177 = 172; day 3,  $n = 178$ ; day 8,  $n = 209$ ,  $n = 5$  mice). (B) Average MI for each day for all  
1178 recorded cells (Kruskal-Wallis,  $H(4) = 13.27$ ,  $p = 0.0041$ ; Dunn's multiple comparisons test;  
1179 day 1,  $n = 562$ ; day 2,  $n = 600$ ; day 3,  $n = 477$ ; day 8,  $n = 492$ ,  $n = 5$  mice). (C) Proportion of  
1180 cells for tuning map correlation (Friedman test,  $\chi^2(2) = 0.400$ ,  $p = .9537$ , significant cell  
1181 pairs only, day1-2,  $n = 158$ ; day 2-3,  $n = 122$ , day 3-8,  $n = 129$ ). (D) Proportion of stable cells  
1182 (tuning map correlation  $> .3$ ) for each progressive day correlation (one-way ANOVA,  $F(3,16)$   
1183 =  $1.457$ ,  $p = 0.2637$ ; significant cell pairs only, day 1-2,  $n = 158$ ; day 2-3,  $n = 122$ , day 3-8,  $n$   
1184 = 129). (E) Proportion of spatially modulated cells per day (day 1,  $n = 562$ ; day 2,  $n = 600$ ;  
1185 day 3,  $n = 477$ ; day 8,  $n = 492$ ,  $n = 5$  mice). \*,  $p < .05$ , \*\*,  $p < .01$

1186

#### 1187 **S15 Fig: Direction encoding by lateral septum cells.**

1188 (A) Examples of significantly modulated cells. The polar plot indicates the probability of the  
1189 cell being active as a function of the animal's head direction. black lines,  $p(\text{active} | \text{bin})$ ; red  
1190 lines indicate 95% upper and lower percentile; blue lines indicate the normalized time spent  
1191 in each direction. MI calculated using  $9^\circ$  bins. (B) Same as A, for non-modulated cells. (C)



1192 Trajectories (grey) with binarized activity superimposed, color-coded from beginning to end  
1193 of the recording for representative cells shown in A. (D) Same as C, but for example, cells  
1194 shown in B. (E) Examples of significantly directionally modulated cells with corresponding  
1195 mean MI value (top) and within-session stability (bottom) representative for each rank.

1196

1197 **S16 Fig: Stability of direction and self-motion encoding over short and longer**  
1198 **timescales**

1199 (A) Tuning plots for a stable directionally modulated cell over days, using a similar set up as  
1200 described as Fig 4. Tuning map correlation indicated at the bottom in red. (B) Significant  
1201 tuning map correlation for aligned cell-pairs (black) versus shuffled pairs (red) for  
1202 progressive days for LS (day 1-2, n = 161 cells; day 2-3, n = 119 cells; day 3-8, n = 110 cells;  
1203 n = 5 mice) and dorsal CA1 (day 1-2, n = 149 cells; day 2-3, n = 102 cells; day 3-8, n = 90  
1204 cells; n = 3 mice). (C) Significant direction map correlations for cells found on all days for  
1205 LS (n = 29 cells) and CA1 (n = 24 cells). (D) Same as B, for velocity tuning in LS (day 1-2, n  
1206 = 110 cells; day 2-3, n = 73 cells; day 3-8, n = 73 cells; n = 5 mice) and dorsal CA1 (day 1-2,  
1207 n = 109 cells; day 2-3, n = 72 cells; day 3-8, n = 61 cells; n = 3 mice). (E) Same as B, for  
1208 acceleration tuning in LS (day 1-2, n = 73 cells; day 2-3, n = 47 cells; day 3-8, n = 43 cells; n  
1209 = 5 mice) and dorsal CA1 (day 1-2, n = 45 cells; day 2-3, n = 40 cells; day 3-8, n = 35 cells; n  
1210 = 3 mice) \*\*\*\*,  $p < .0001$ . Test used in B, D, E two-way ANOVA, with Sidak's multiple  
1211 comparisons test

1212

1213 **S17 Fig: Direction, speed and acceleration encoding in dorsal hippocampus.**

1214 (A) Left: Distribution of MI (left) and p-values (right) for direction for dCA1, dCA3 and LS.  
1215 Right: MI (bits) per binarized event, for all cells recorded from each region (Kruskal-Wallis,  
1216  $H(3) = 351.2$ ,  $p < .0001$ ; Dunn's multiple comparisons test; LS: n = 1230 cells, n = 19

1217 animals, CA1:  $n = 677$  cells,  $n = 4$  animals, CA3:  $n = 546$  cells,  $n = 7$  animals). (B) Same as  
1218 A, for velocity (Kruskal-Wallis,  $H(3) = 325.3$ ,  $p < .0001$ ; Dunn's multiple comparisons test)  
1219 (C) Same as B, for acceleration (Kruskal-Wallis,  $H(3) = 262.2$ ,  $p < .0001$ ; Dunn's multiple  
1220 comparisons test). (D) Left: Proportion of cells that are significantly modulated by only one  
1221 modality (grey), two modalities (yellow), three (red) or all 4 of the investigated variables  
1222 (black) for dCA1 ( $n = 677$  cells,  $n = 4$  mice). Right: absolute proportion of cells modulated  
1223 by any combination of variables. E) Same as D, for dCA3 ( $n = 546$  cells,  $N = 7$  mice). \*,  $p <$   
1224  $.05$ , \*\*\*\*,  $p < .0001$

1225

1226 **S18 Fig: LS GABAergic neurons project to the medial septum, hypothalamus and**  
1227 **ventral tegmental area.**

1228 (A) Injection of anterograde, Cre-dependent eYFP (green) viral tracing in VGAT-Cre mouse  
1229 LS. (B) Injection site in intermediate/dorsal LS (LSd) with some cell bodies labelled in  
1230 intermediate LS (LSi; Green, eYFP; blue, DAPI counterstaining). (C) eYFP-positive fibers in  
1231 the medial septum, (D) hypothalamus and (E) ventral tegmental area. (F) Coronal  
1232 hippocampal section shows no anterograde labelling of the hippocampal formation, either  
1233 dorsal or (G) ventral. Scale bars: B, 500  $\mu\text{m}$ , C, 500  $\mu\text{m}$ , D, 500  $\mu\text{m}$ , E, 500  $\mu\text{m}$  and F, 500  
1234  $\mu\text{m}$ , G) 700  $\mu\text{m}$ . DB = diagonal band, DG = dentate gyrus, LSd = dorsal lateral septum, LSi =  
1235 intermediate lateral septum, LSV = ventral lateral septum, MS = medial septum, S =  
1236 subiculum, 3V = third ventricle.

1237

1238 **S19 Fig: Extent of primary injection sites in dorsal CA1 and CA3.**

1239 (A) Coronal sections showing expression of tdTom (red) in dorsal CA1 along anterior to  
1240 posterior axis. (B) Same as A, for primary injections in dorsal CA3. Scale bars: 500  $\mu\text{m}$  for  
1241 all sections.

1242

1243 **S20 Fig: Anterograde transsynaptic tracing shows that CA1 and CA3 project**  
1244 **preferentially to dorsal LS.**

1245 (A) Primary AAV1 injections in CA1 and CA3, using the same injection strategy as  
1246 described in Fig 6A. (B) Coronal section showing expression pattern at different anterior-  
1247 posterior levels of the LS, with (red) tdTOM positive CA3 projections to LS and eYFP-  
1248 positive second-order transduction in LS (left). Bottom schematic: an overview of the  
1249 approximate bregma level of coronal slices shown. Bottom right: zoomed versions showing  
1250 tdTom-positive hippocampal afferents, eYFP-positive LS cell bodies, and merge. (C) Total  
1251 eYFP-positive cells counted at the level of LS following transsynaptic tracer injection in  
1252 dCA1 versus dCA3 (dCA1-LS, N = 3 mice; dCA3-LS, N = 5 mice). (D) Total eYFP-positive  
1253 cells along the dorsal-ventral and anterior-posterior axis observed in LS for dorsal CA3  
1254 injection and (E) for dorsal CA1 injection. Scale bars: B, top: 500  $\mu\text{m}$ , bottom: 500  $\mu\text{m}$ . C, all  
1255 overview images, 500  $\mu\text{m}$ , all zoomed images, 50  $\mu\text{m}$ . ns = not significant.

1256

1257 **S21 Fig: No changes in cell activity along dorsal-ventral or anterior-posterior axis of the**  
1258 **LS.**

1259 (A) Probability of being active for each cell along the anterior-posterior axis (left), medial-  
1260 lateral axis (middle), and dorsal-ventral axis (right). All cells were recorded during free  
1261 exploration in the open field (linear regression, AP:  $R^2 = 2.014 \times 10^4$ ,  $p = 0.5611$ ; ML:  $R^2 =$   
1262  $1.012 \times 10^4$ ,  $p = 0.6803$ ; DV:  $R^2 = 2.717 \times 10^4$ ,  $p = 0.6803$ ;  $n = 1679$  cells,  $n = 24$  mice). (B)  
1263 Same as A, but for activity index as described in S5 Fig (linear regression, AP:  $R^2 = 2.691 \times$   
1264  $10^4$ ,  $p = 0.5017$ ; ML:  $R^2 = 3.287 \times 10^5$ ,  $p = 0.8144$ ; DV:  $R^2 = 3.254 \times 10^4$ ,  $p = 0.4601$ ;  $n =$   
1265  $1679$  cells,  $n = 24$  mice). (C) Same as for A, but for bursting index (linear regression, AP:  $R^2$

1266 =  $7.085 \times 10^4$ ,  $p = 0.2757$ ; ML:  $R^2 = 7.457 \times 10^5$ ,  $p = 0.7237$ ; DV:  $R^2 = 3.731 \times 10^3$ ,  $p =$   
1267 0.0123;  $n = 1679$  cells,  $n = 24$  mice).

1268

## 1269 **References**

- 1270 1. Zhao C, Eisinger B, Gammie S. Characterization of GABAergic neurons in the mouse  
1271 lateral septum: a double fluorescence in situ hybridization and immunohistochemical  
1272 study using tyramide signal amplification. *PLoS One*. 2013;8: 1–24.  
1273 doi:10.1371/journal.pone.0073750
- 1274 2. Lin W, McKinney K, Liu L, Lakhiani S, Jennes L. Distribution of vesicular glutamate  
1275 transporter-2 messenger ribonucleic acid and protein in the septum-hypothalamus of  
1276 the rat. *Endocrinology*. 2003;144: 662–670.
- 1277 3. Risold PY, Swanson LW. Structural evidence for functional domains in the rat  
1278 hippocampus. *Science*. 1996;272: 1484–1486. doi:10.1126/science.272.5267.1484
- 1279 4. Tingley D, Buzsáki G. Transformation of a spatial map across the hippocampal-lateral  
1280 septal circuit. *Neuron*. 2018;98: 1229-1242.e5. doi:10.1016/j.neuron.2018.04.028
- 1281 5. Swanson LW, Cowan WM. The connections of the septal region in the rat. *J Comp*  
1282 *Neur*. 1979;186: 621–656. doi:10.1038/nature19789
- 1283 6. Brito GNO, Thomas GJ. T-maze alternation, response patterning, and septo-  
1284 hippocampal circuitry in rats. *Behav Brain Res*. 1981;3: 319–340. doi:10.1016/0166-  
1285 4328(81)90003-6
- 1286 7. Rawlins JNP, Olton DS. The septo-hippocampal system and cognitive mapping. *Behav*  
1287 *Brain Res*. 1982;5: 331–358. doi:10.1016/0166-4328(82)90039-0
- 1288 8. Stanton ME, Thomas GJ, Brito GNO. Posterodorsal septal lesions impair performance  
1289 on both shift and stay working memory tasks. *Behav Neurosci*. 1984;98: 405–415.  
1290 doi:10.1037/0735-7044.98.3.405

- 1291 9. Thomas GJ. Comparison of effects of small lesions in posterodorsal septum on  
1292 spontaneous and rerun correction (contingently reinforced) alternation in rats. *J Comp*  
1293 *Physiol Psychol.* 1979;93: 685–694. doi:10.1037/h0077608
- 1294 10. Thomas GJ, Brito GN. Recovery of delayed alternation in rats after lesions in medial  
1295 frontal cortex and septum. *J Comp Physiol Psychol.* 1980;94: 808–818.  
1296 doi:10.1037/h0077834
- 1297 11. Calderwood MT, Tseng A, Glenn Stanley B. Lateral septum mu opioid receptors in  
1298 stimulation of feeding. *Brain Res.* 2020;1734: 146648.  
1299 doi:10.1016/j.brainres.2020.146648
- 1300 12. Carus-Cadavieco M, Gorbati M, Ye L, Bender F, van der Veldt S, Kosse C, et al.  
1301 Gamma oscillations organize top-down signalling to hypothalamus and enable food  
1302 seeking. *Nature.* 2017;542: 232–236. doi:10.1038/nature21066
- 1303 13. Sweeney P, Yang Y. An inhibitory septum to lateral hypothalamus circuit that  
1304 suppresses feeding. *J Neurosci.* 2016;36: 11185–11195.  
1305 doi:10.1523/JNEUROSCI.2042-16.2016
- 1306 14. Xu Y, Lu Y, Cassidy RM, Mangieri LR, Zhu C, Huang X, et al. Identification of a  
1307 neurocircuit underlying regulation of feeding by stress-related emotional responses.  
1308 *Nat Commun.* 2019;10. doi:10.1038/s41467-019-11399-z
- 1309 15. Anthony TE, Dee N, Bernard A, Lerchner W, Heintz N, Anderson DJ. Control of  
1310 stress-induced persistent anxiety by an extra-amygdala septohypothalamic circuit. *Cell.*  
1311 2014;156: 522–536. doi:10.1016/j.cell.2013.12.040
- 1312 16. Besnard A, Gao Y, Kim MT, Twarkowski H, Reed AK, Langberg T, et al.  
1313 Dorsolateral septum somatostatin interneurons gate mobility to calibrate context-  
1314 specific behavioral responses. *Nat Neurosci.* 2019;22: 436–446. doi:10.1038/s41593-  
1315 018-0330-y

- 1316 17. Sparks P, Ledoux J. The septal complex as seen through the context of fear. In: the  
1317 behavioral neuroscience of the septal region. Springer-Verlag; 2000.
- 1318 18. Trent NL, Menard JL. The ventral hippocampus and the lateral septum work in tandem  
1319 to regulate rats' open-arm exploration in the elevated plus-maze. *Physiol Behav.*  
1320 2010;101: 141–152. doi:10.1016/j.physbeh.2010.04.035
- 1321 19. Bender F, Gorbati M, Cadavieco MC, Denisova N, Gao X, Holman C, et al. Theta  
1322 oscillations regulate the speed of locomotion via a hippocampus to lateral septum  
1323 pathway. *Nat Commun.* 2015;6: 8521. doi:10.1038/ncomms9521
- 1324 20. Wirtshafter HS, Wilson MA. Locomotor and hippocampal processing converge in the  
1325 lateral septum. *Curr Biol.* 2019;29: 3177-3192.e3. doi:10.1016/j.cub.2019.07.089
- 1326 21. Bredewold R, Schiavo JK, van der Hart M, Verreij M, Veenema AH. Dynamic  
1327 changes in extracellular release of GABA and glutamate in the lateral septum during  
1328 social play behavior in juvenile rats: Implications for sex-specific regulation of social  
1329 play behavior. *Neuroscience.* 2015;307: 117–127.  
1330 doi:10.1016/j.neuroscience.2015.08.052
- 1331 22. Chee S-SA, Menard JL, Dringenberg HC. The lateral septum as a regulator of  
1332 hippocampal theta oscillations and defensive behavior in rats. *J Neurophysiol.*  
1333 2015;113: 1831–1841. doi:10.1152/jn.00806.2014
- 1334 23. Clemens AM, Wang H, Brecht M. The lateral septum mediates kinship behavior in the  
1335 rat. *Nat Commun.* 2020;11: 1–11. doi:10.1038/s41467-020-16489-x
- 1336 24. Leroy F, Park J, Asok A, Brann DH, Meira T, Boyle LM, et al. A circuit from  
1337 hippocampal CA2 to lateral septum disinhibits social aggression. *Nature.* 2018;564:  
1338 213–218.
- 1339 25. Risold PY, Swanson LW. Connections of the rat lateral septal complex. *Brain Res*  
1340 *Rev.* 1997;24: 115–195. doi:10.1016/S0165-0173(97)00009-X

- 1341 26. Swanson LW, Cowan WM. An autoradiographic study of the organization of the  
1342 efferent connections of the hippocampal formation in the rat. *J Comp Neur.* 1977;172:  
1343 49–84. doi:10.1002/cne.901720104
- 1344 27. Kita T, Nishijo H, Eifuku S, Terasawa K, Ono T. Place and contingency differential  
1345 responses of monkey septal neurons during conditional place-object discrimination. *J*  
1346 *Neurosci.* 1995;15: 1683–1703.
- 1347 28. Leutgeb S, Mizumori S. Context-specific spatial representations by lateral septal cells.  
1348 *Neuroscience.* 2002;112: 655–663. doi:10.1016/S0306-4522(02)00101-X
- 1349 29. Nishijo H, Kita T, Tamura R, Uwano T, Terasawa K. Septal neuronal responses related  
1350 to spatial representation in monkeys. *Hippocampus.* 1997;464: 460–464.
- 1351 30. Takamura Y, Tamura R, Zhou TL, Kobayashi T, Tran AH, Eifuku S, et al. Spatial  
1352 firing properties of lateral septal neurons. *Hippocampus.* 2006;16: 635–644.  
1353 doi:10.1002/hipo
- 1354 31. Zhou TL, Tamura R, Kuriwaki J, Ono T. Comparison of medial and lateral septal  
1355 neuron activity during performance of spatial tasks in rats. 1999;234: 220–234.
- 1356 32. Wirtshafter HS, Wilson MA. Differences in reward biased spatial representations in  
1357 the lateral septum and hippocampus. *Elife.* 2020;9: 1–20. doi:10.7554/eLife.55252
- 1358 33. Risold PY, Swanson LW. Chemoarchitecture of the rat lateral septal nucleus. *Brain*  
1359 *Res Rev.* 1997;24: 91–113. doi:10.1016/S0165-0173(97)00008-8
- 1360 34. Gonzalez WG, Zhang H, Harutyunyan A, Lois C. Persistence of neuronal  
1361 representations through time and damage in the hippocampus. *Science.* 2019;365:  
1362 821–825. doi:10.1126/science.aav9199
- 1363 35. Howard MW, Kahana MJ. A distributed representation of temporal context. *J Math*  
1364 *Psychol.* 2002;46: 269–299. doi:10.1006/jmps.2001.1388
- 1365 36. Mankin EA, Diehl GW, Sparks FT, Leutgeb S, Leutgeb JK. Hippocampal CA2

- 1366 activity patterns change over time to a larger extent than between spatial contexts.  
1367 Neuron. 2015;85: 190–202. doi:10.1016/j.neuron.2014.12.001
- 1368 37. Rubin A, Geva N, Sheintuch L, Ziv Y. Hippocampal ensemble dynamics timestamp  
1369 events in long-term memory. Elife. 2015;4: 1–16. doi:10.7554/eLife.12247
- 1370 38. Ziv Y, Burns LD, Cocker ED, Hamel EO, Ghosh KK, Kitch LJ, et al. Long-term  
1371 dynamics of CA1 hippocampal place codes. Nat Neurosci. 2013;16: 264–266.  
1372 doi:10.1038/nn.3329
- 1373 39. Luo AH, Tahsili-Fahadan P, Wise RA, Lupica CR, Aston-Jones G. Linking context  
1374 with reward: a functional circuit from hippocampal CA3 to ventral tegmental area.  
1375 Science. 2011;333: 353–358.
- 1376 40. McGlinchey EM, Aston-Jones G. Dorsal hippocampus drives context-induced cocaine  
1377 seeking via inputs to lateral septum. Neuropsychopharmacology. 2018;43: 987–1000.  
1378 doi:10.1038/npp.2017.144
- 1379 41. Butler CW, Wilson YM, Gunnensen JM, Murphy M. Tracking the fear memory  
1380 engram: Discrete populations of neurons within amygdala, hypothalamus, and lateral  
1381 septum are specifically activated by auditory fear conditioning. Learn Mem. 2015;22:  
1382 370–384. doi:10.1101/lm.037663.114
- 1383 42. Garcia R, Vouimba RM, Jaffard R. Contextual conditioned fear blocks the induction  
1384 but not the maintenance of lateral septal LTP in behaving mice. J Neurophysiol.  
1385 1997;78: 76–81. doi:10.1152/jn.1997.78.1.76
- 1386 43. Reis DG, Scopinho AA, Guimarães FS, Corrêa F, Resstel LBM. Involvement of the  
1387 lateral septal area in the expression of fear conditioning to context. Learn Mem.  
1388 2010;17: 134–138. doi:10.1101/lm.1534710
- 1389 44. Vetere G, Kenney JW, Tran LM, Xia F, Steadman PE, Parkinson J, et al.  
1390 Chemogenetic interrogation of a brain-wide fear memory network in mice. Neuron.



- 1391 2017;94: 363-374.e4. doi:10.1016/j.neuron.2017.03.037
- 1392 45. Leutgeb S, Mizumori S. Excitotoxic septal lesions result in spatial memory deficits and  
1393 altered flexibility of hippocampal single-unit representations. *J Neurosci.* 1999;19:  
1394 6661–72. Available: <http://www.ncbi.nlm.nih.gov/pubmed/10414995>
- 1395 46. M’Harzi M, Jarrard LE. Effects of medial and lateral septal lesions on acquisition of a  
1396 place and cue radial maze task. *Behav Brain Res.* 1992;49: 159–165.  
1397 doi:10.1016/S0166-4328(05)80160-3
- 1398 47. Etter G, Manseau F, Williams S. A probabilistic framework for decoding behavior  
1399 from in vivo calcium imaging data. *Front Neural Circuits.* 2020;14: 1–16.  
1400 doi:10.3389/fncir.2020.00019
- 1401 48. Shannon CE. A mathematical theory of communication. *Bell Syst Tech J.* 1948;27:  
1402 379–423. doi:10.1145/584091.584093
- 1403 49. Skaggs WE, McNaughton BL, Gothard KM. An information-theoretic approach to  
1404 deciphering the hippocampal code. *Advances in Neural Information Processing*  
1405 *Systems 5* eds Hanson, SJ, Giles, CL & Cowan, JD. 1993. pp. 1030–1037.  
1406 doi:10.1109/EUMC.2007.4405137
- 1407 50. Souza BC., Pavão R, Belchior H, Tort A. On information metrics for spatial coding.  
1408 *Neuroscience.* 2018;375: 62–73. doi:10.1016/j.neuroscience.2018.01.066
- 1409 51. Gallagher JP, Zheng F, Hasuo H, Shinnick-Gallagher P. Activities of neurons within  
1410 the rat dorsolateral septal nucleus (DLSN). *Prog Neurobiol.* 1995;45: 373–395.  
1411 doi:10.1016/0301-0082(95)98600-A
- 1412 52. Markus EJ, Qin YL, Leonard B, Skaggs WE, McNaughton BL, Barnes CA.  
1413 Interactions between location and task affect the spatial and directional firing of  
1414 hippocampal neurons. *J Neurosci.* 1995;15: 7079–7094. doi:10.1523/JNEUROSCI.15-  
1415 11-07079.1995

- 1416 53. McNaughton BL, Barnes CA, O'Keefe J. The contributions of position, direction and  
1417 velocity to single unit activity in the hippocampus of freely-moving rats. *Exp Brain*  
1418 *Res.* 1983;52.
- 1419 54. Navratilova Z, Hoang LT, Daniela Schwindel C, Tatsuno M, McNaughton BL.  
1420 Experience-dependent firing rate remapping generates directional selectivity in  
1421 hippocampal place cells. *Front Neural Circuits.* 2012;6: 1–14.  
1422 doi:10.3389/fncir.2012.00006
- 1423 55. Mau W, Sullivan DW, Kinsky NR, Hasselmo ME, Howard MW, Eichenbaum H. The  
1424 same hippocampal CA1 population simultaneously codes temporal information over  
1425 multiple timescales. *Curr Biol.* 2018;28: 1499-1508.e4. doi:10.1016/j.cub.2018.03.051
- 1426 56. Pedemonte M, Barrenechea C, Nuñez A, Gambini JP, García-Austt E. Membrane and  
1427 circuit properties of lateral septum neurons: Relationships with hippocampal rhythms.  
1428 *Brain Res.* 1998;800: 145–153. doi:10.1016/S0006-8993(98)00517-4
- 1429 57. Twery MJ, Gallagher JP. Somatostatin depresses GABA receptor-mediated inhibition  
1430 in the rat dorsolateral septal nucleus. *Brain Res.* 1990;519: 277–286.  
1431 doi:10.1016/0006-8993(90)90089-T
- 1432 58. Twery MJ, Phelan KD, Gallagher JP. Spontaneous bursting and non-bursting activity  
1433 in morphologically identified neurons of the rat dorsolateral septal nucleus, *in vitro*.  
1434 *Neuroscience.* 1992;46: 669–679. doi:10.1016/0306-4522(92)90153-S
- 1435 59. Acharya L, Aghajian ZM, Vuong C, Moore JJ, Mehta MR. Causal influence of visual  
1436 cues on hippocampal directional selectivity. *Cell.* 2016;164: 197–207.  
1437 doi:10.1016/j.cell.2015.12.015
- 1438 60. Leutgeb S, Ragozzino KE, Mizumori S. Convergence of head direction and place  
1439 information in the CA1 region of hippocampus. *Neuroscience.* 2000;100: 11–19.  
1440 doi:10.1016/S0306-4522(00)00258-X

- 1441 61. Muller RU, Bostock E, Taube JS, Kubie J. On the directional firing properties of  
1442 hippocampal place cells. *J Neurosci.* 1994;14: 7235–7251. doi:10.1523/jneurosci.14-  
1443 12-07235.1994
- 1444 62. Czurko A, Hirase H, Csicsvari J, Buzsáki G. Sustained activation of hippocampal  
1445 pyramidal cells by “space clamping” in a running wheel. *Eur J Neurosci.* 1999;11:  
1446 344–352. doi:10.1046/j.1460-9568.1999.00446.x
- 1447 63. Góis ZHTD, Tort ABL. Characterizing speed cells in the rat hippocampus. *Cell Rep.*  
1448 2018;25: 1872–1884. doi:10.1016/j.celrep.2018.10.054
- 1449 64. Iwase M, Kitanishi T, Mizuseki K. Cell type, sub-region, and layer-specific speed  
1450 representation in the hippocampal–entorhinal circuit. *Sci Rep.* 2020;10: 1–23.  
1451 doi:10.1038/s41598-020-58194-1
- 1452 65. Zingg B, Chou X lin, Zhang Z gang, Mesik L, Liang F, Tao HW, et al. AAV-mediated  
1453 anterograde transsynaptic tagging: mapping corticocollicular input-defined neural  
1454 pathways for defense behaviors. *Neuron.* 2017;93: 33–47.  
1455 doi:10.1016/j.neuron.2016.11.045
- 1456 66. Leranath C, Deller T, Buzsáki G. Intraseptal connections redefined: lack of a lateral  
1457 septum to medial septum path. *Brain Res.* 1992;583: 1–11. doi:10.1016/S0006-  
1458 8993(10)80004-6
- 1459 67. Staiger JF, Nürnberger F. The efferent connections of the lateral septal nucleus in the  
1460 guinea pig: projections to the diencephalon and brainstem. *Cell Tissue Res.* 1991;264:  
1461 391–413. doi:10.1007/BF00319031
- 1462 68. Witter MP, Daelmans HE, Jorritsma-Byham B, Staiger JF, Wouterlood FG. Restricted  
1463 origin and distribution of projections from the lateral to the medial septal complex in  
1464 rat and guinea pig. *Neurosci Lett.* 1992;148: 164–168. Available:  
1465 <http://www.ncbi.nlm.nih.gov/entrez/query.fcgi?cmd=Retrieve&db=PubMed&dopt=Cit>

- 1466            ation&list\_uids=1284441
- 1467    69.    Beier KT, Steinberg EE, Deloach KE, Kremer EJ, Malenka RC, Luo L, et al. Circuit  
1468            architecture of VTA dopamine neurons revealed by systematic input-output mapping.  
1469            Cell. 2015;162: 622–634. doi:10.1016/j.cell.2015.07.015
- 1470    70.    Jung MW, Wiener SI, McNaughton BL. Comparison of spatial firing characteristics of  
1471            units in dorsal and ventral hippocampus of the rat. J Neurosci. 1994;14: 7347–7356.  
1472            doi:10.1523/jneurosci.14-12-07347.1994
- 1473    71.    Kjelstrup KB, Solstad T, Brun VH, Hafting T, Leutgeb S, Witter MP, et al. Finite scale  
1474            of spatial representation in the hippocampus. Science. 2008;321: 140–143.  
1475            doi:10.1126/science.1157086
- 1476    72.    Maurer AP, Cowen SL, Burke SN, Barnes CA, McNaughton BL. Phase precession in  
1477            hippocampal interneurons showing strong functional coupling to individual pyramidal  
1478            cells. J Neurosci. 2006;26: 13485–13492. doi:10.1523/JNEUROSCI.2882-06.2006
- 1479    73.    Taube J, Muller R, Ranck J. Head-direction cells recorded from the postsubiculum in  
1480            freely moving rats. I. Description and quantitative analysis. J Neurosci. 1990;10: 420–  
1481            435. doi:10.1523/jneurosci.10-02-00420.1990
- 1482    74.    Taube JS, Muller RU, Ranck JB. Head-direction cells recorded from the  
1483            postsubiculum in freely moving rats. II. Effects of environmental manipulations. J  
1484            Neurosci. 1990;10: 436–447. doi:10.1523/jneurosci.10-02-00436.1990
- 1485    75.    Taube JS. Head direction cells recorded in the anterior thalamic nuclei of freely  
1486            moving rats. J Neurosci. 1995;15: 70–86. doi:10.1523/jneurosci.15-01-00070.1995
- 1487    76.    Stackman RW, Taube JS. Firing properties of rat lateral mammillary single units: Head  
1488            direction, head pitch, and angular head velocity. J Neurosci. 1998;18: 9020–9037.  
1489            doi:10.1523/jneurosci.18-21-09020.1998
- 1490    77.    Sargolini F, Fyhn M, Hafting T, McNaughton BL, Witter MP, Moser MB, et al.

- 1491            Conjunctive representation of position, direction, and velocity in entorhinal cortex.  
1492            *Science*. 2006;312: 758–762. doi:10.1126/science.1125572
- 1493    78.    Chen LL, Lin LH, Green EJ, Barnes CA, McNaughton BL. Head-direction cells in the  
1494            rat posterior cortex. I. Anatomical distribution and behavioral modulation. *Exp Brain*  
1495            *Res*. 1994;101: 8–23. doi:10.1007/BF00243212
- 1496    79.    Sharp PE, Blair HT, Cho J. The anatomical and computational basis of the rat head-  
1497            direction cell signal. *Trends Neurosci*. 2001;24: 289–294. doi:10.1016/s0030-  
1498            6657(08)70226-9
- 1499    80.    Boccara CN, Sargolini F, Thoresen VH, Solstad T, Witter MP, Moser EI, et al. Grid  
1500            cells in pre-and parasubiculum. *Nat Neurosci*. 2010;13: 987–994. doi:10.1038/nn.2602
- 1501    81.    Cacucci F, Lever C, Wills TJ, Burgess N, O’Keefe J. Theta-modulated place-by-  
1502            direction cells in the hippocampal formation in the rat. *J Neurosci*. 2004;24: 8265–  
1503            8277. doi:10.1523/JNEUROSCI.2635-04.2004
- 1504    82.    Oh SW, Harris JA, Ng L, Winslow B, Cain N, Mihalas S, et al. A mesoscale  
1505            connectome of the mouse brain. *Nature*. 2014;508: 207–214. doi:10.1038/nature13186
- 1506    83.    Eichenbaum H. Time cells in the hippocampus: A new dimension for mapping  
1507            memories. *Nat Rev Neurosci*. 2014;15: 732–744. doi:10.1038/nrn3827
- 1508    84.    Pastalkova E, Itskov V, Amarasingham A, Buzsáki G. Internally generated cell  
1509            assembly sequences in the rat hippocampus. *Science*. 2008;321: 1322–1328.  
1510            doi:10.1126/science.1159775
- 1511    85.    Deshmukh SS, Bhalla US. Representation of odor habituation and timing in the  
1512            hippocampus. *J Neurosci*. 2003;23: 1903–1915. doi:10.1523/jneurosci.23-05-  
1513            01903.2003
- 1514    86.    MacDonald CJ, Carrow S, Place R, Eichenbaum H. Distinct hippocampal time cell  
1515            sequences represent odor memories in immobilized rats. *J Neurosci*. 2013;33: 14607–

- 1516 14616. doi:10.1523/JNEUROSCI.1537-13.2013
- 1517 87. Aronov D, Nevers R, Tank DW. Mapping of a non-spatial dimension by the  
1518 hippocampal-entorhinal circuit. *Nature*. 2017;543: 719–722. doi:10.1038/nature21692
- 1519 88. Alonso JR, Frotscher M. Organization of the septal region in the rat brain: a Golgi EM  
1520 study of lateral septal neurons. *J Comp Neurol*. 1989;286: 472–487.
- 1521 89. Staiger JF, Nürnberger F. Pattern of afferents to the lateral septum in the guinea pig.  
1522 *Cell Tissue Res*. 1989;257: 471–490. doi:10.1007/BF00221457
- 1523 90. Phelan KD, Hasuo H, Twery MJ, Gallagher JP. Projection neurons in the rat  
1524 dorsolateral septal nucleus possess recurrent axon collaterals. *Neurosci Lett*. 1989;97:  
1525 259–265. doi:10.1016/0304-3940(89)90607-1
- 1526 91. Isely G, Hillar CJ, Sommer FT. Deciphering subsampled data: Adaptive compressive  
1527 sampling as a principle of brain communication. *Adv Neural Inf Process Syst* 23 24th  
1528 *Annu Conf Neural Inf Process Syst* 2010, NIPS 2010. 2010; 1–9.
- 1529 92. Palm G, Sommer FT. Associative data storage and retrieval in neural networks.  
1530 Domany E., van Hemmen JL, Schulten K, editors. *Models of Neural Networks III*.  
1531 *Physics of Neural Networks*. Springer, New York, NY.; 2006.
- 1532 93. Staiger JF, Nürnberger F. The efferent connections of the lateral septal nucleus in the  
1533 guinea pig: intrinsic connectivity of the septum and projections to other telencephalic  
1534 areas. *Cell Tissue Res*. 1991;264: 415–426. doi:10.1007/BF00319032
- 1535 94. Tóth K, Borhegyi Z, Freund TF. Postsynaptic targets of GABAergic hippocampal  
1536 neurons in the medial septum-diagonal band of broca complex. *J Neurosci*. 1993;13:  
1537 3712–3724. doi:10.1523/jneurosci.1413-04.2004
- 1538 95. Manseau F, Goutagny R, Danik M, Williams S. The hippocamposeptal pathway  
1539 generates rhythmic firing of GABAergic neurons in the medial septum and diagonal  
1540 bands: an investigation using a complete septohippocampal preparation in vitro. *J*

- 1541 Neurosci. 2008;28: 4096–4107. doi:10.1523/JNEUROSCI.0247-08.2008
- 1542 96. Leão RN, Targino ZH, Colom L V., Fisahn A. Interconnection and synchronization of  
1543 neuronal populations in the mouse medial septum/diagonal band of Broca. J  
1544 Neurophysiol. 2015;113: 971–980. doi:10.1152/jn.00367.2014
- 1545 97. Patel J, Schomburg EW, Bere A, Fujisawa S. Local generation and propagation of  
1546 ripples along the septotemporal axis of the hippocampus. 2013;33: 17029–17041.  
1547 doi:10.1523/JNEUROSCI.2036-13.2013
- 1548 98. Robinson J, Manseau F, Ducharme G, Vigneault E, El Mestikawy S, Williams S.  
1549 Optogenetic activation of septal glutamatergic neurons drive hippocampal theta  
1550 rhythms. 2016;36: 3016–3023. doi:10.1523/JNEUROSCI.2141-15.2016
- 1551 99. Buzsáki G. Theta oscillations in the hippocampus. Neuron. 2002;33: 325–340.  
1552 doi:10.1016/S0896-6273(02)00586-X
- 1553 100. Fuhrmann F, Justus D, Sosulina L, Kaneko H, Beutel T, Friedrichs D, et al.  
1554 Locomotion, theta oscillations, and the speed-correlated firing of hippocampal neurons  
1555 are controlled by a medial septal glutamatergic circuit. Neuron. 2015;86: 1253–1264.  
1556 doi:10.1016/j.neuron.2015.05.001
- 1557 101. Justus D, Dalügge D, Bothe S, Fuhrmann F, Hannes C, Kaneko H, et al. Glutamatergic  
1558 synaptic integration of locomotion speed via septoentorhinal projections. Nat  
1559 Neurosci. 2017;20: 16–19. doi:10.1038/nn.4447
- 1560 102. Stuber GD, Wise RA. Lateral hypothalamic circuits for feeding and reward. Nat  
1561 Neurosci. 2016;19: 198–205. doi:10.1016/j.physbeh.2017.03.040
- 1562 103. Burdakov D, Peleg-Raibstein D. The hypothalamus as a primary coordinator of  
1563 memory updating. Physiol Behav. 2020;223: 112988.  
1564 doi:10.1016/j.physbeh.2020.112988
- 1565 104. Aitta-Aho T, Pappa E, Burdakov D, Apergis-Schoute J. Cellular activation of

- 1566           hypothalamic hypocretin/orexin neurons facilitates short-term spatial memory in mice.  
1567           *Neurobiol Learn Mem.* 2016;136: 183–188. doi:10.1016/j.nlm.2016.10.005
- 1568   105.   Izawa S, Chowdhury S, Miyazaki T, Mukai Y, Ono D, Inoue R, et al. REM sleep-  
1569           active MCH neurons are involved in forgetting hippocampus-dependent memories.  
1570           *Science.* 2019;365: 1308–1313. doi:10.1126/science.aax9238
- 1571   106.   Kosse C, Burdakov D. Natural hypothalamic circuit dynamics underlying object  
1572           memorization. *Nat Commun.* 2019;10: 1–8. doi:10.1038/s41467-019-10484-7
- 1573   107.   Petrovich GD. Lateral hypothalamus as a motivation-cognition interface in the control  
1574           of feeding behavior. *Front Syst Neurosci.* 2018;12: 1–7. doi:10.3389/fnsys.2018.00014
- 1575   108.   Gladfelter WE, Brobeck JR. Decreased spontaneous locomotor activity in the rat  
1576           induced by hypothalamic lesions. *Am J Physiol.* 1962;203: 811–817.  
1577           doi:10.1152/ajplegacy.1962.203.5.811
- 1578   109.   Grillner S, Wallén P, Saitoh K, Kozlov A, Robertson B. Neural bases of goal-directed  
1579           locomotion in vertebrates-An overview. *Brain Res Rev.* 2008;57: 2–12.  
1580           doi:10.1016/j.brainresrev.2007.06.027
- 1581   110.   Kosse C, Schöne C, Bracey E, Burdakov D. Orexin-driven GAD65 network of the  
1582           lateral hypothalamus sets physical activity in mice. *Proc Natl Acad Sci U S A.*  
1583           2017;114: 4525–4530. doi:10.1073/pnas.1619700114
- 1584   111.   Sinnamon HM. Preoptic and hypothalamic neurons and the initiation of locomotion in  
1585           the anesthetized rat. *Prog Neurobiol.* 1993;41: 323–344. doi:10.1016/0301-  
1586           0082(93)90003-B
- 1587   112.   Mahler S V., Moorman DE, Smith RJ, James MH, Aston-Jones G. Motivational  
1588           activation: A unifying hypothesis of orexin/hypocretin function. *Nat Neurosci.*  
1589           2014;17: 1298–1303. doi:10.1038/nn.3810
- 1590   113.   Mogenson GJ, Jones DL, Yim CY. From motivation to action: Functional interface



- 1591            between the limbic system and the motor system. *Prog Neurobiol.* 1980;14: 69–97.  
1592            doi:10.1016/0301-0082(80)90018-0
- 1593    114. Callaway EM. Transneuronal circuit tracing with neurotropic viruses. *Curr Opin*  
1594            *Neurobiol.* 2008;18: 617–623. doi:10.1016/j.conb.2009.03.007
- 1595    115. Wickersham IR, Finke S, Conzelmann KK, Callaway EM. Retrograde neuronal tracing  
1596            with a deletion-mutant rabies virus. *Nat Methods.* 2007;4: 47–49.  
1597            doi:10.1038/nmeth999
- 1598    116. Cai DJ, Aharoni D, Shuman T, Shobe J, Biane J, Song W, et al. A shared neural  
1599            ensemble links distinct contextual memories encoded close in time. *Nature.* 2016;534:  
1600            115–118. doi:10.1038/nature17955
- 1601    117. Ghosh KK, Burns LD, Cocker ED, Nimmerjahn A, Ziv Y, Gamal A El, et al.  
1602            Miniaturized integration of a fluorescence microscope. *Nat Methods.* 2011;8: 871–878.  
1603            doi:10.1038/nmeth.1694
- 1604    118. Ting JT, Daigle TL, Chen Q, Feng G. Acute brain slice methods for adult and aging  
1605            animals: Application of targeted patch clamp analysis and optogenetics. *Methods Mol*  
1606            *Biol.* 2014;1183: 221–242. doi:10.1007/978-1-4939-1096-0\_14
- 1607    119. Pnevmatikakis EA, Giovannucci A. NoRMCorre: An online algorithm for piecewise  
1608            rigid motion correction of calcium imaging data. *J Neurosci Methods.* 2017;291: 83–  
1609            94. doi:10.1016/j.jneumeth.2017.07.031
- 1610    120. Zhou P, Resendez SL, Rodriguez-Romaguera J, Jimenez JC, Neufeld SQ, Stuber GD,  
1611            et al. Efficient and accurate extraction of in vivo calcium signals from  
1612            microendoscopic video data. 2017. doi:http://arxiv.org/abs/1605.07266
- 1613    121. Mathis A, Mamidanna P, Cury KM, Abe T, Murthy VN, Mathis MW, et al.  
1614            DeepLabCut: markerless pose estimation of user-defined body parts with deep  
1615            learning. *Nat Neurosci.* 2018;21: 1281–1289. doi:10.1038/s41593-018-0209-y

- 1616 122. Nath T, Mathis A, Chen AC, Patel A, Bethge M, Mathis MW. Using DeepLabCut for  
1617 3D markerless pose estimation across species and behaviors. *Nat Protoc.* 2019;14:  
1618 2152–2176. doi:10.1038/s41596-019-0176-0
- 1619 123. Cohen MX. *Analyzing neural time series data: Theory and practice.* Cambridge, MA:  
1620 The MIT Press; 2014.
- 1621 124. Sheintuch L, Rubin A, Brande-Eilat N, Geva N, Sadeh N, Pinchasof O, et al. Tracking  
1622 the same neurons across multiple days in Ca<sup>2+</sup> imaging data. *Cell Rep.* 2017;21:  
1623 1102–1115. doi:10.1016/j.celrep.2017.10.013
- 1624

# Figure 1

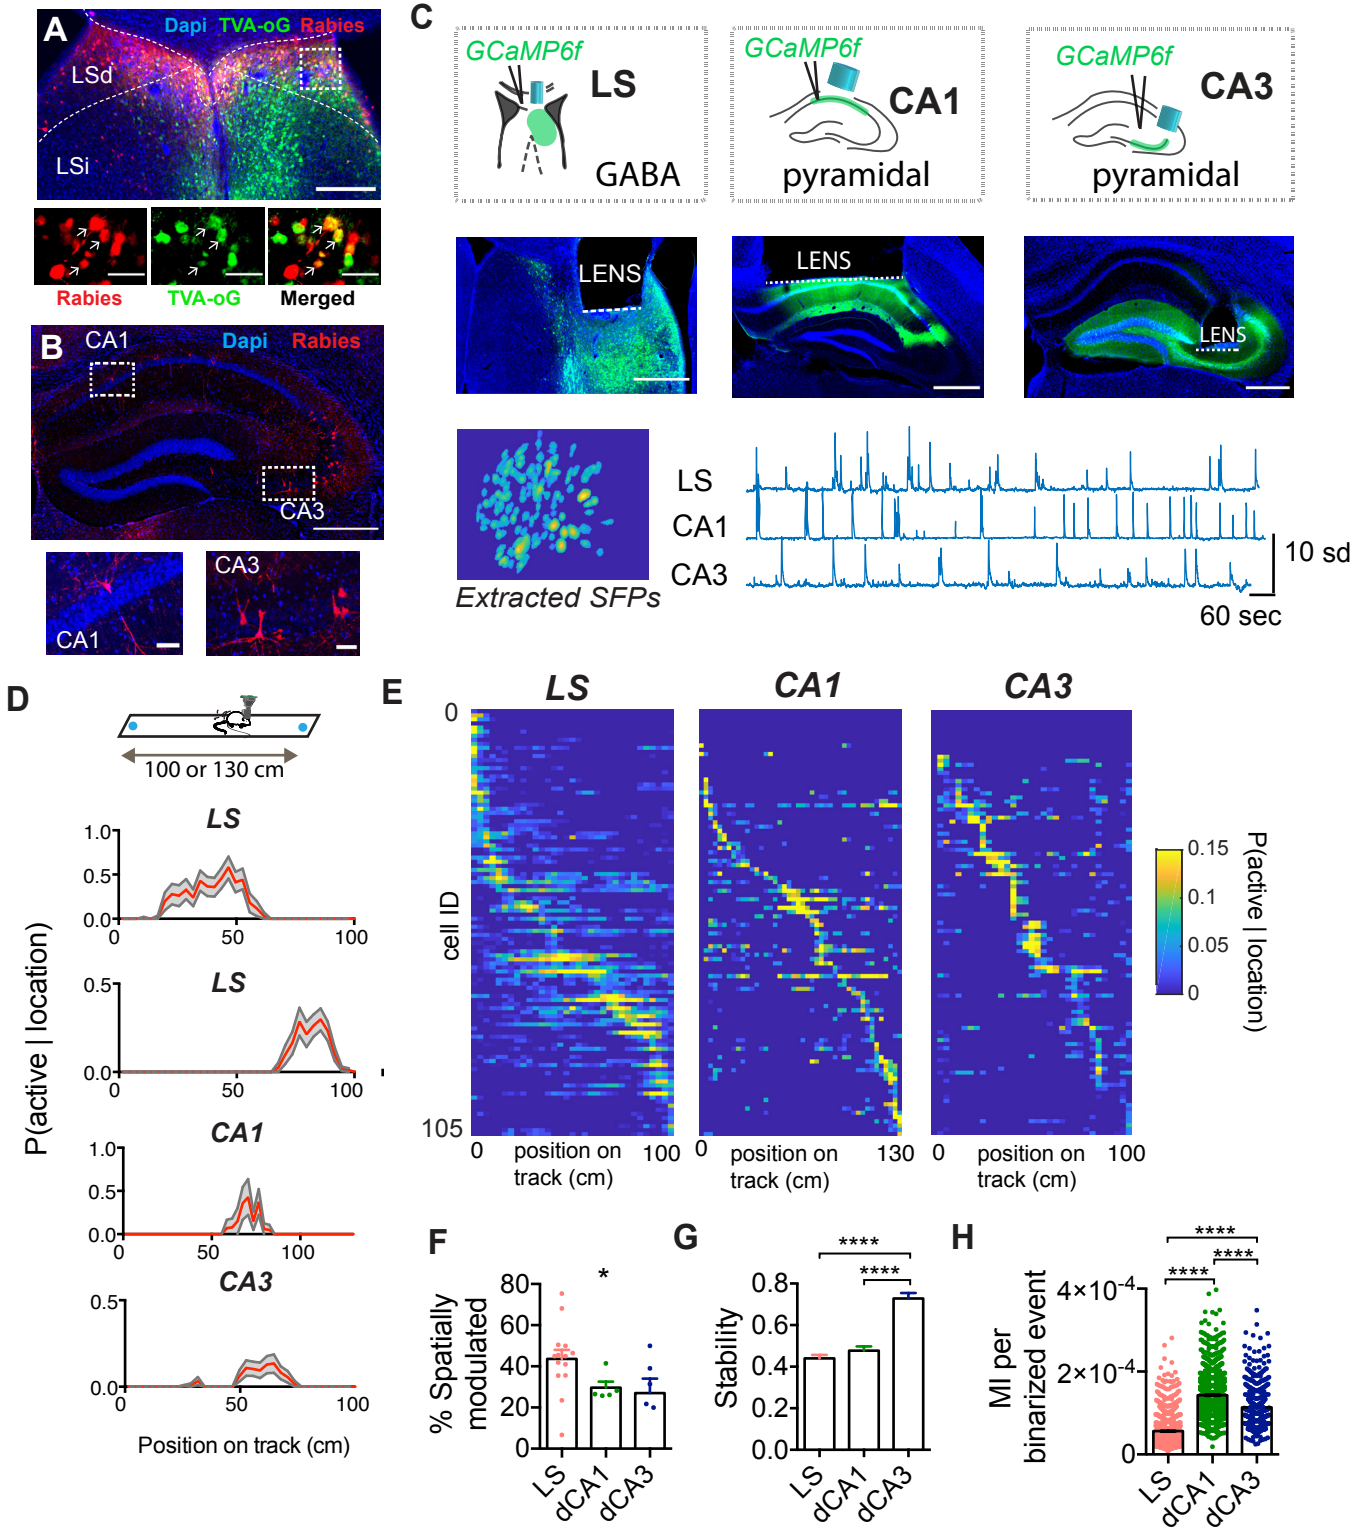

## Figure 2

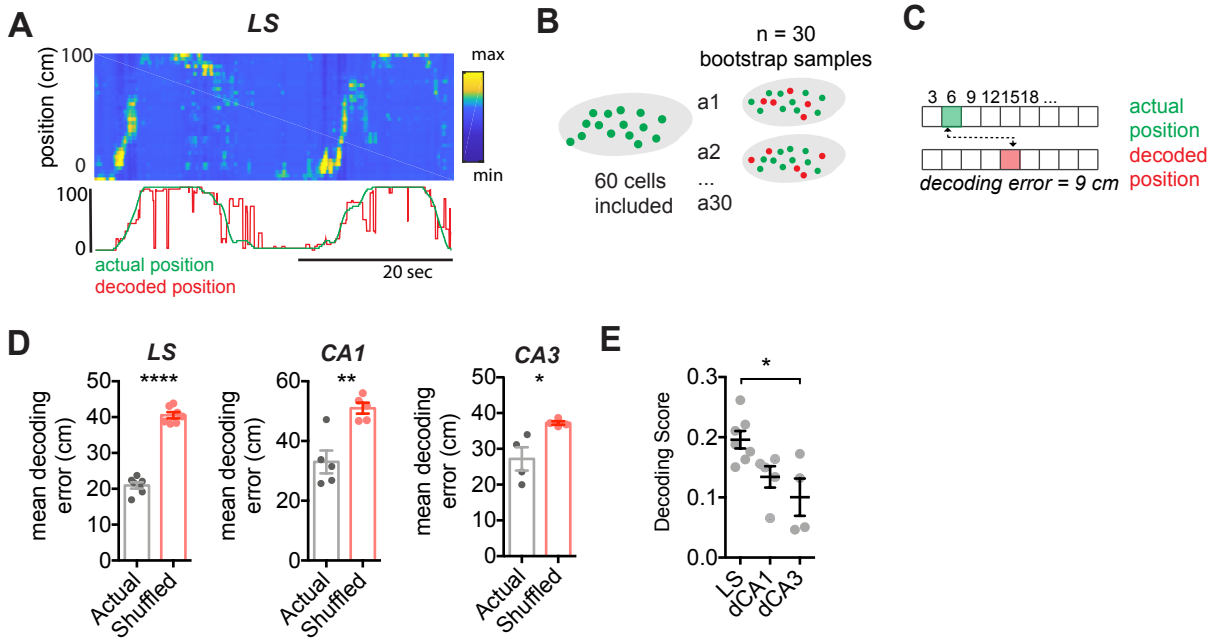

# Figure 3

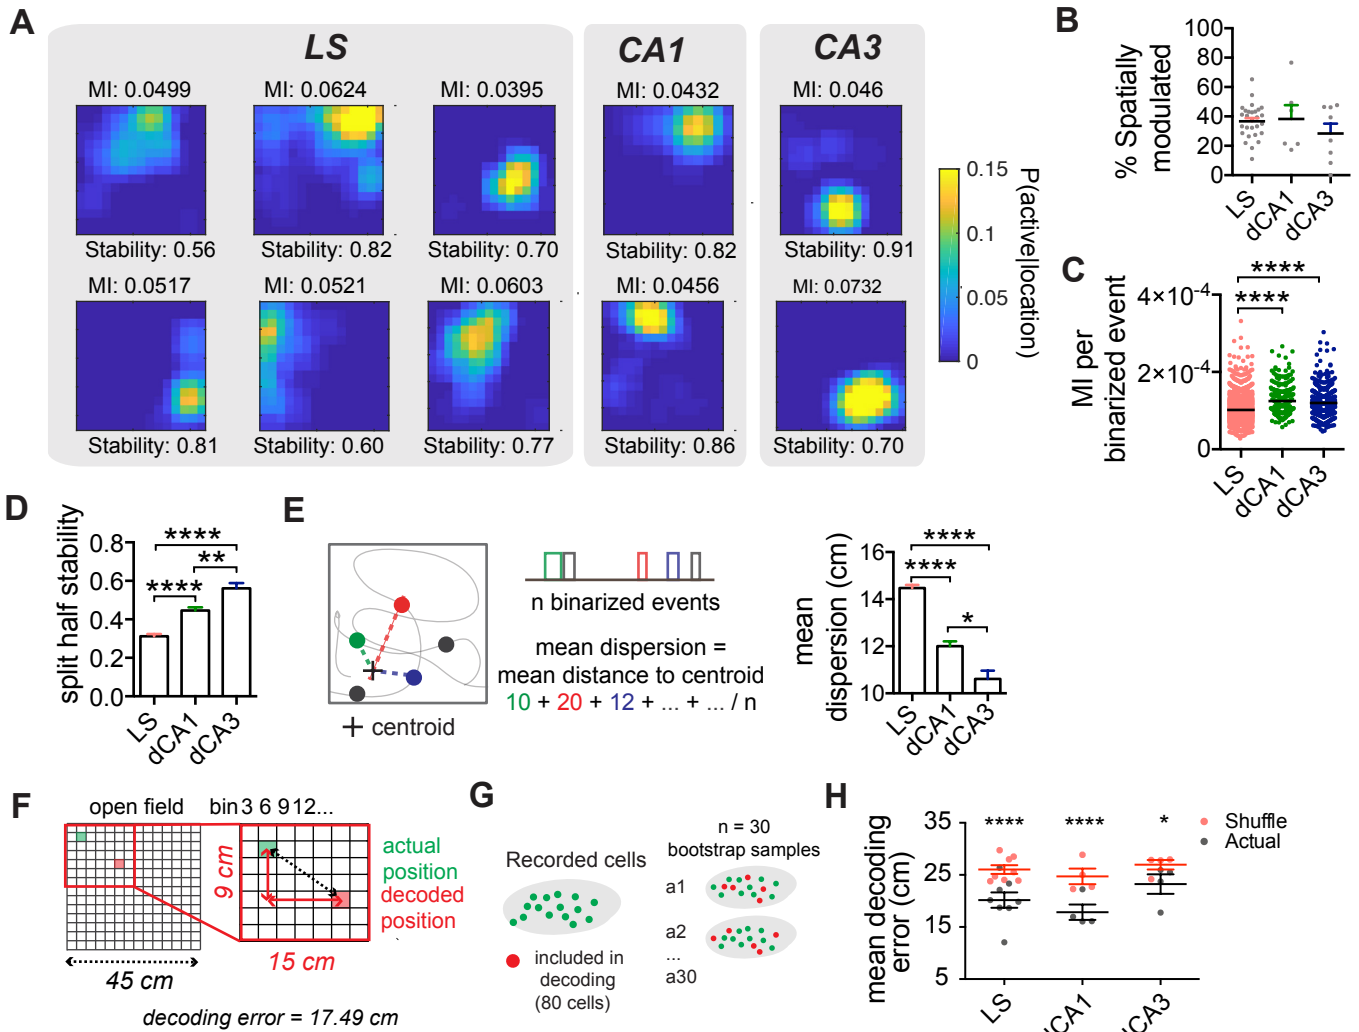

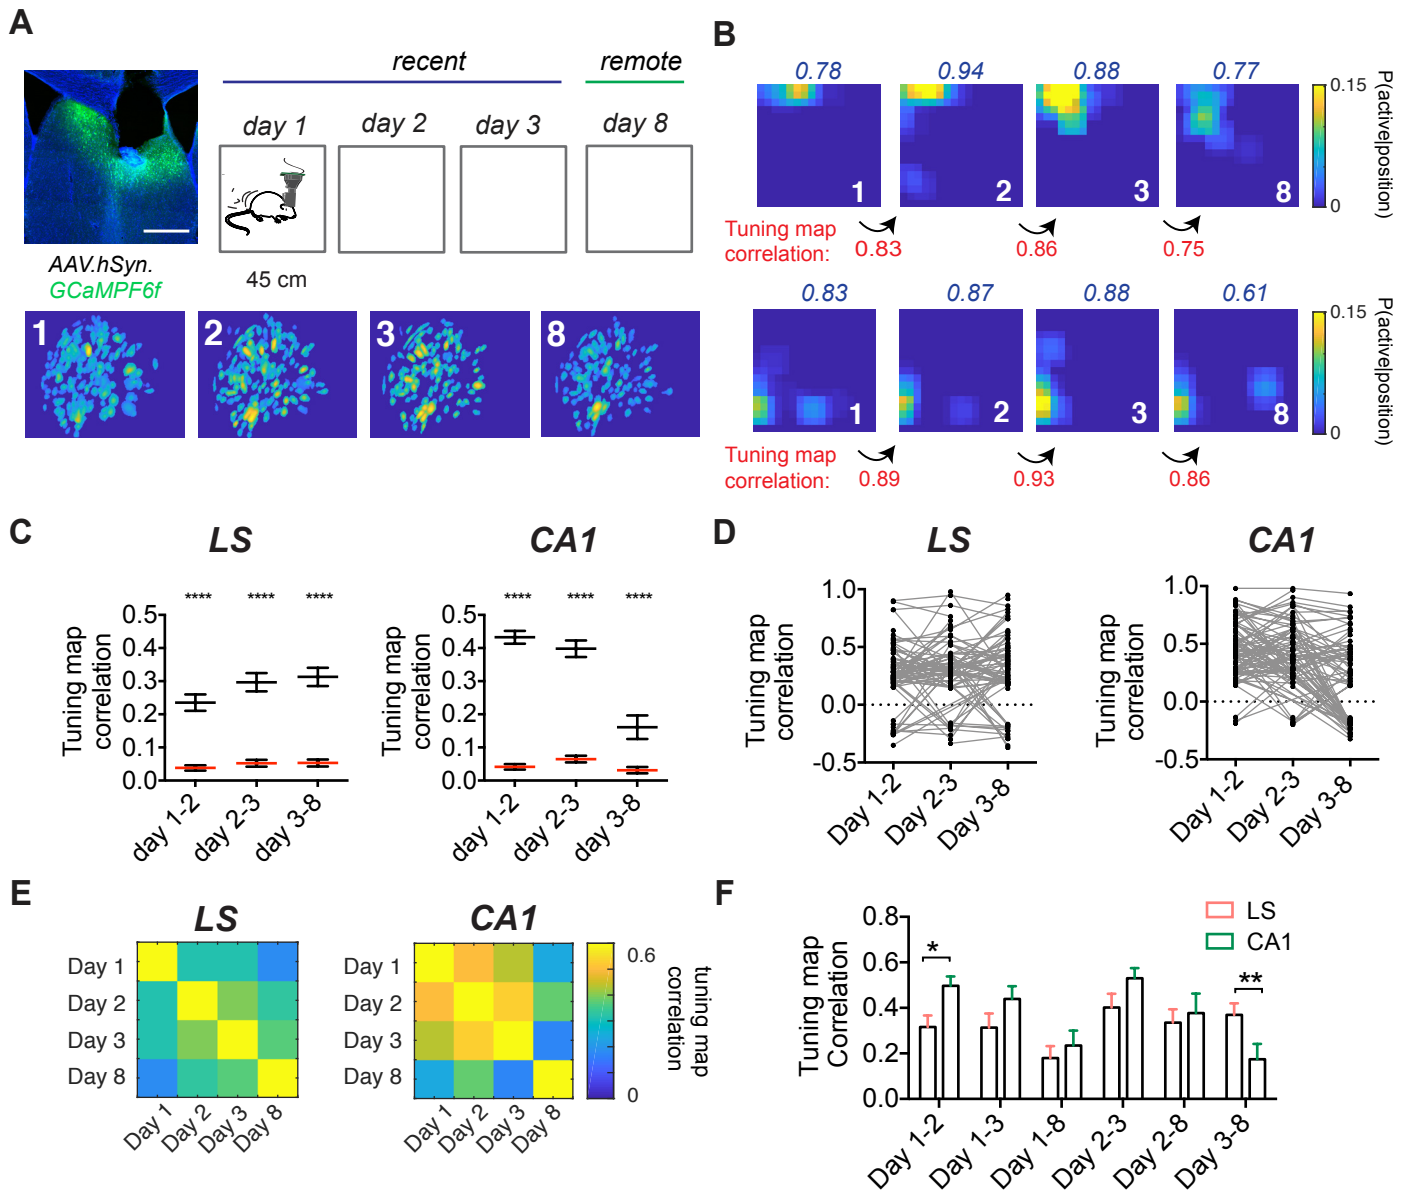

# Figure 5

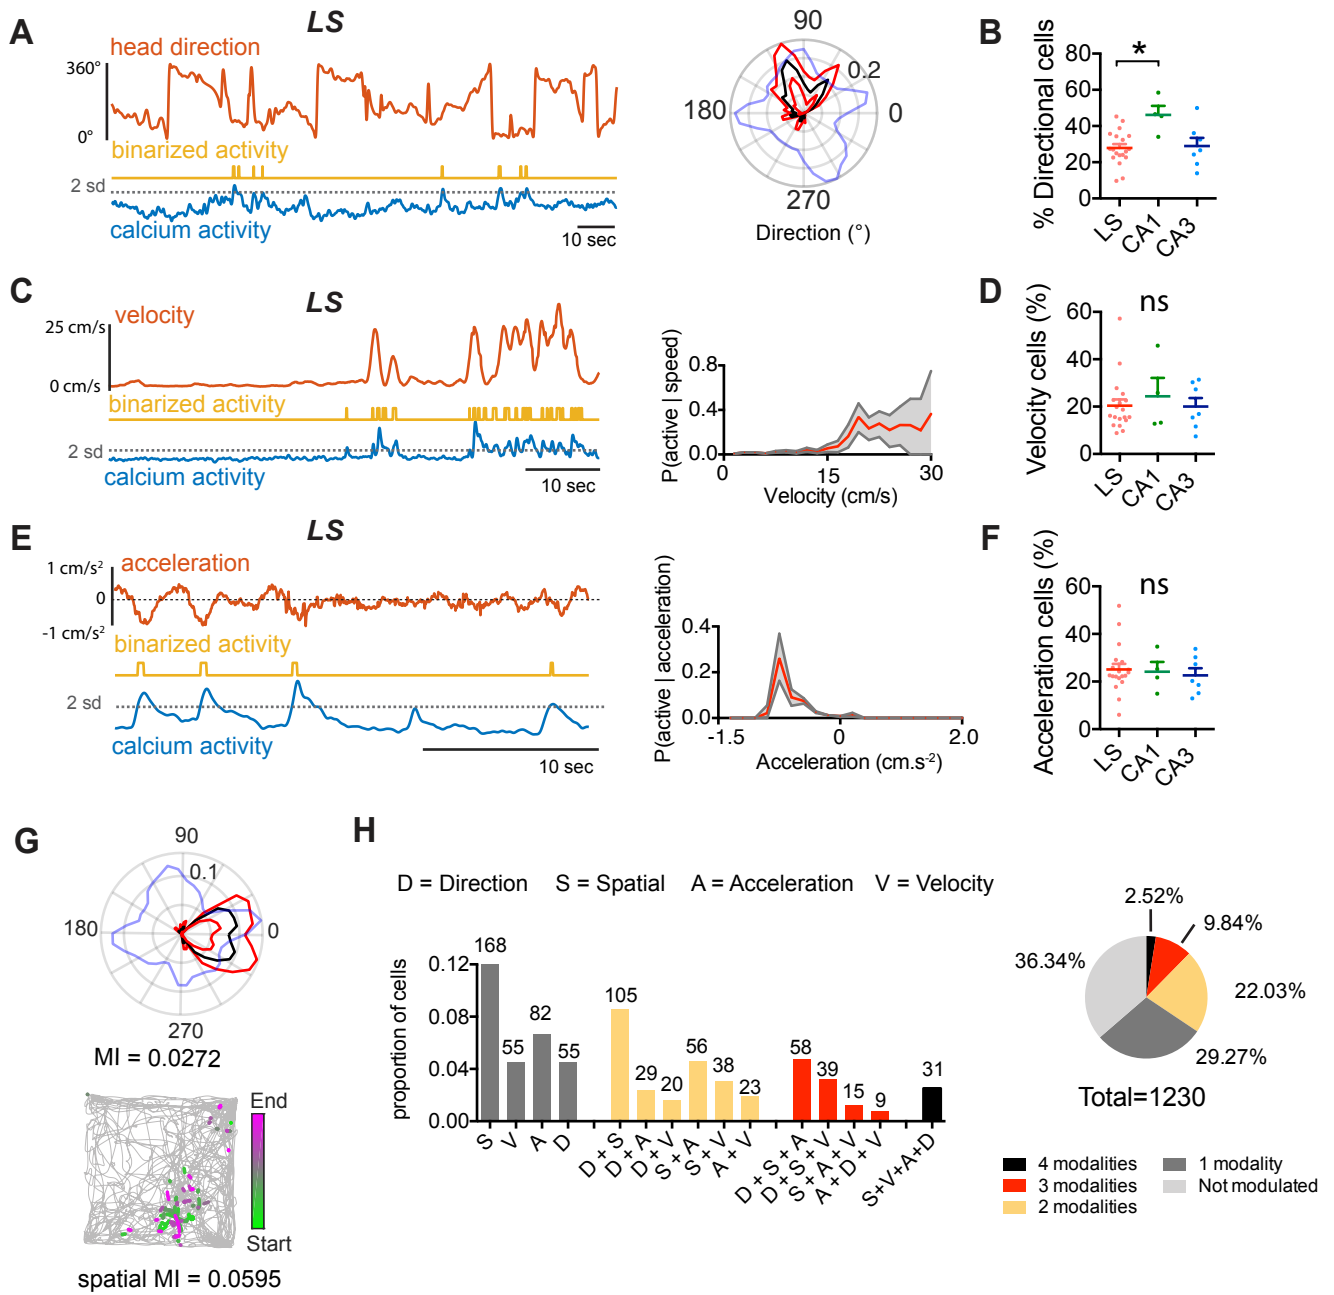

## Figure 6

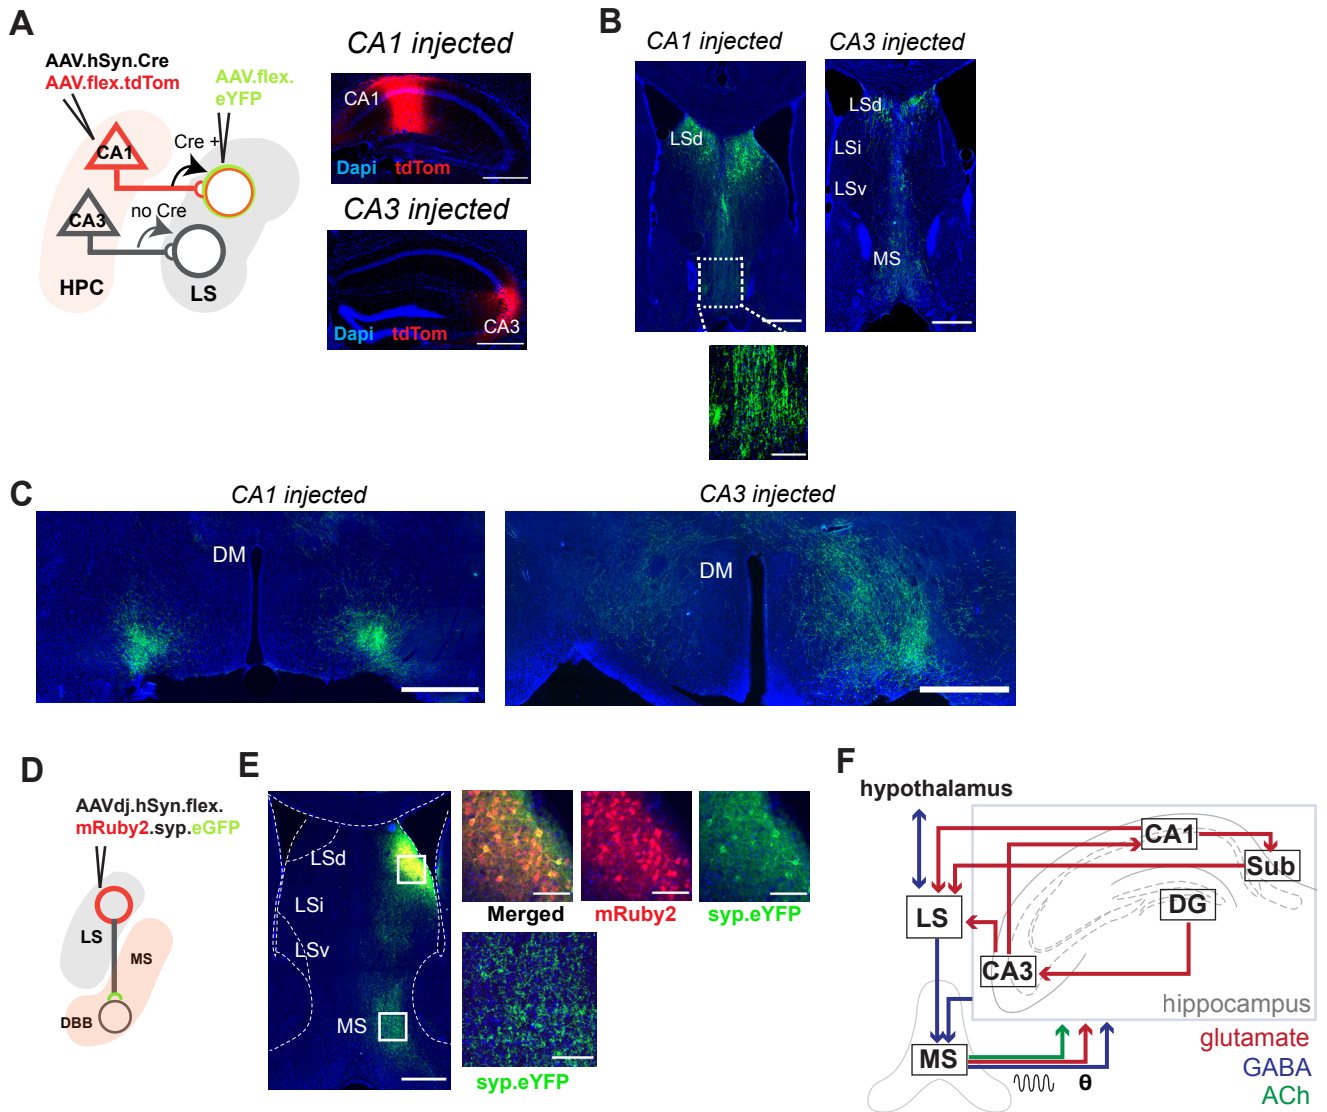



# Figure 7

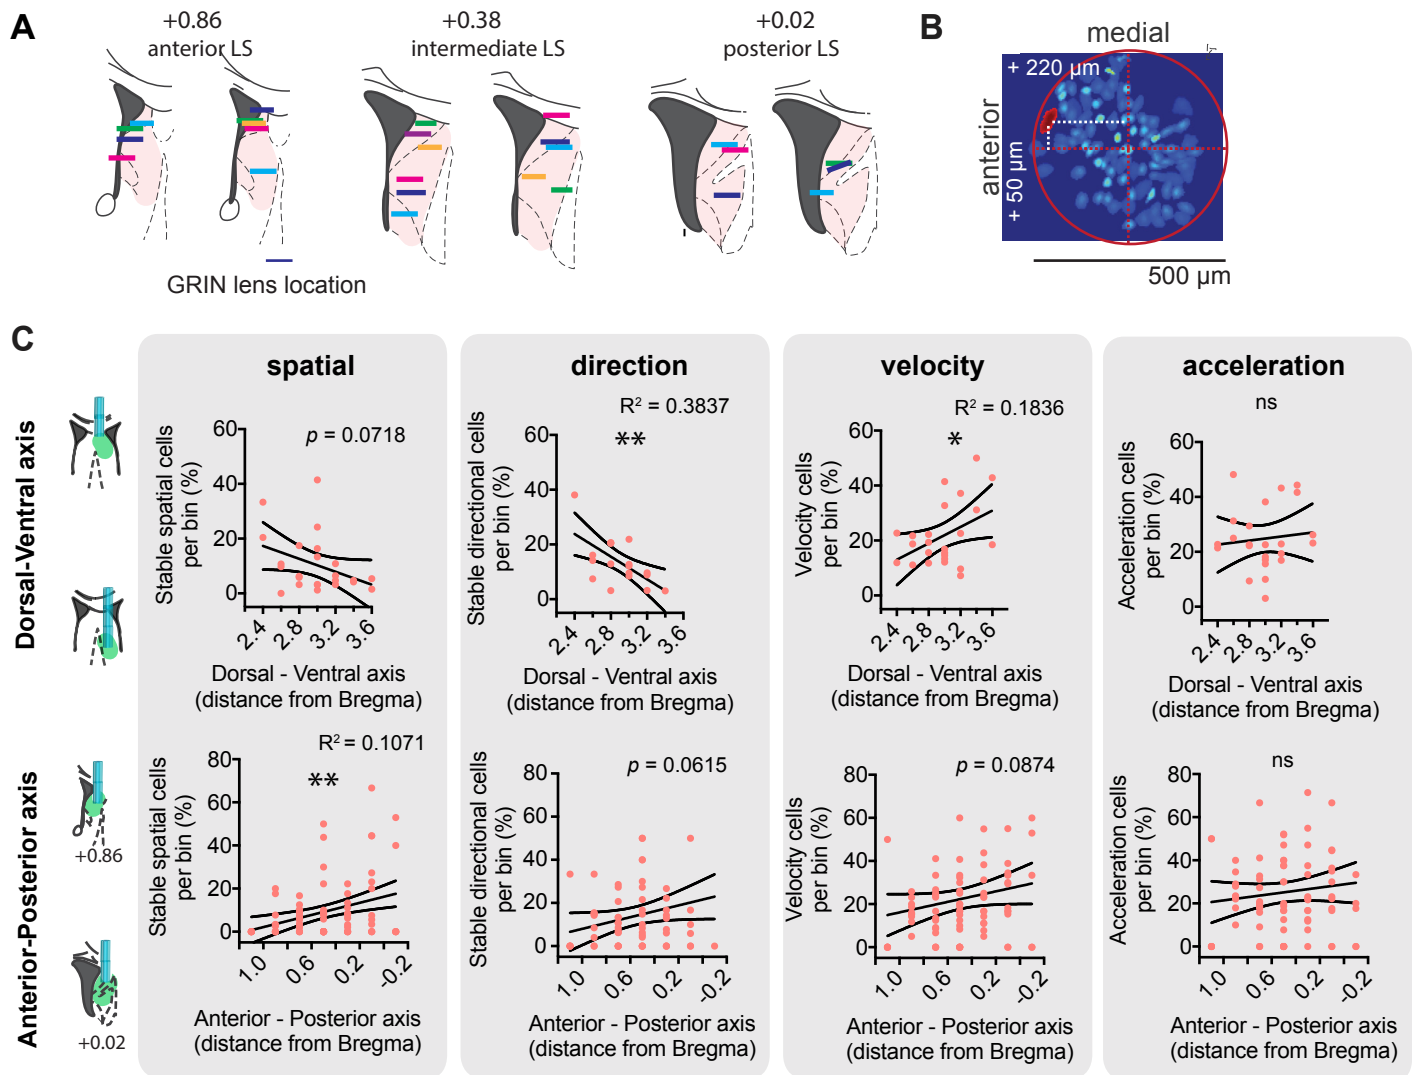

S1 Fig

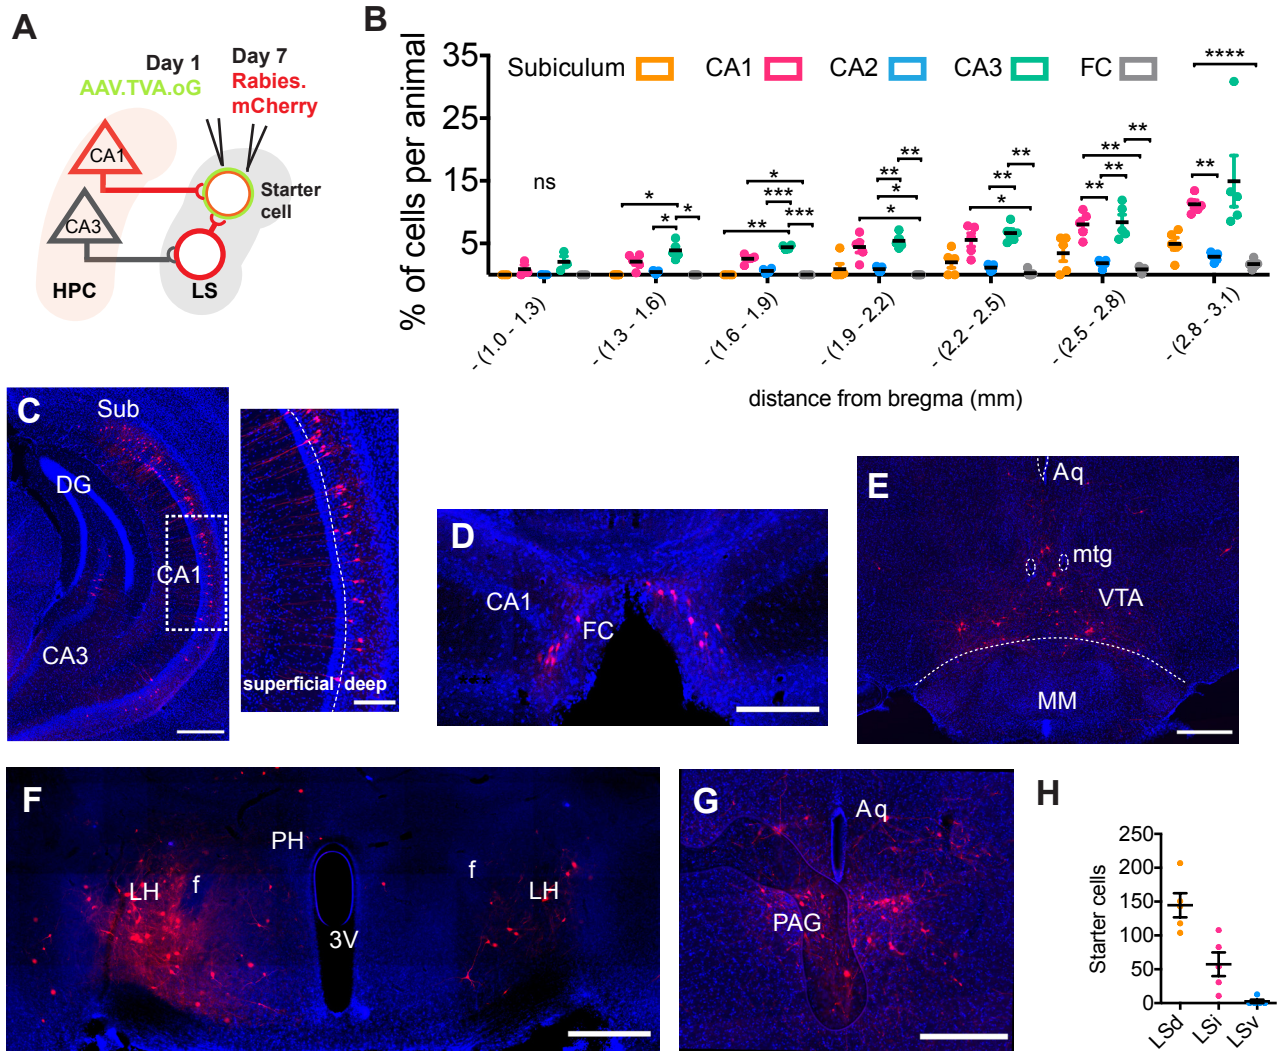

# S2 Fig

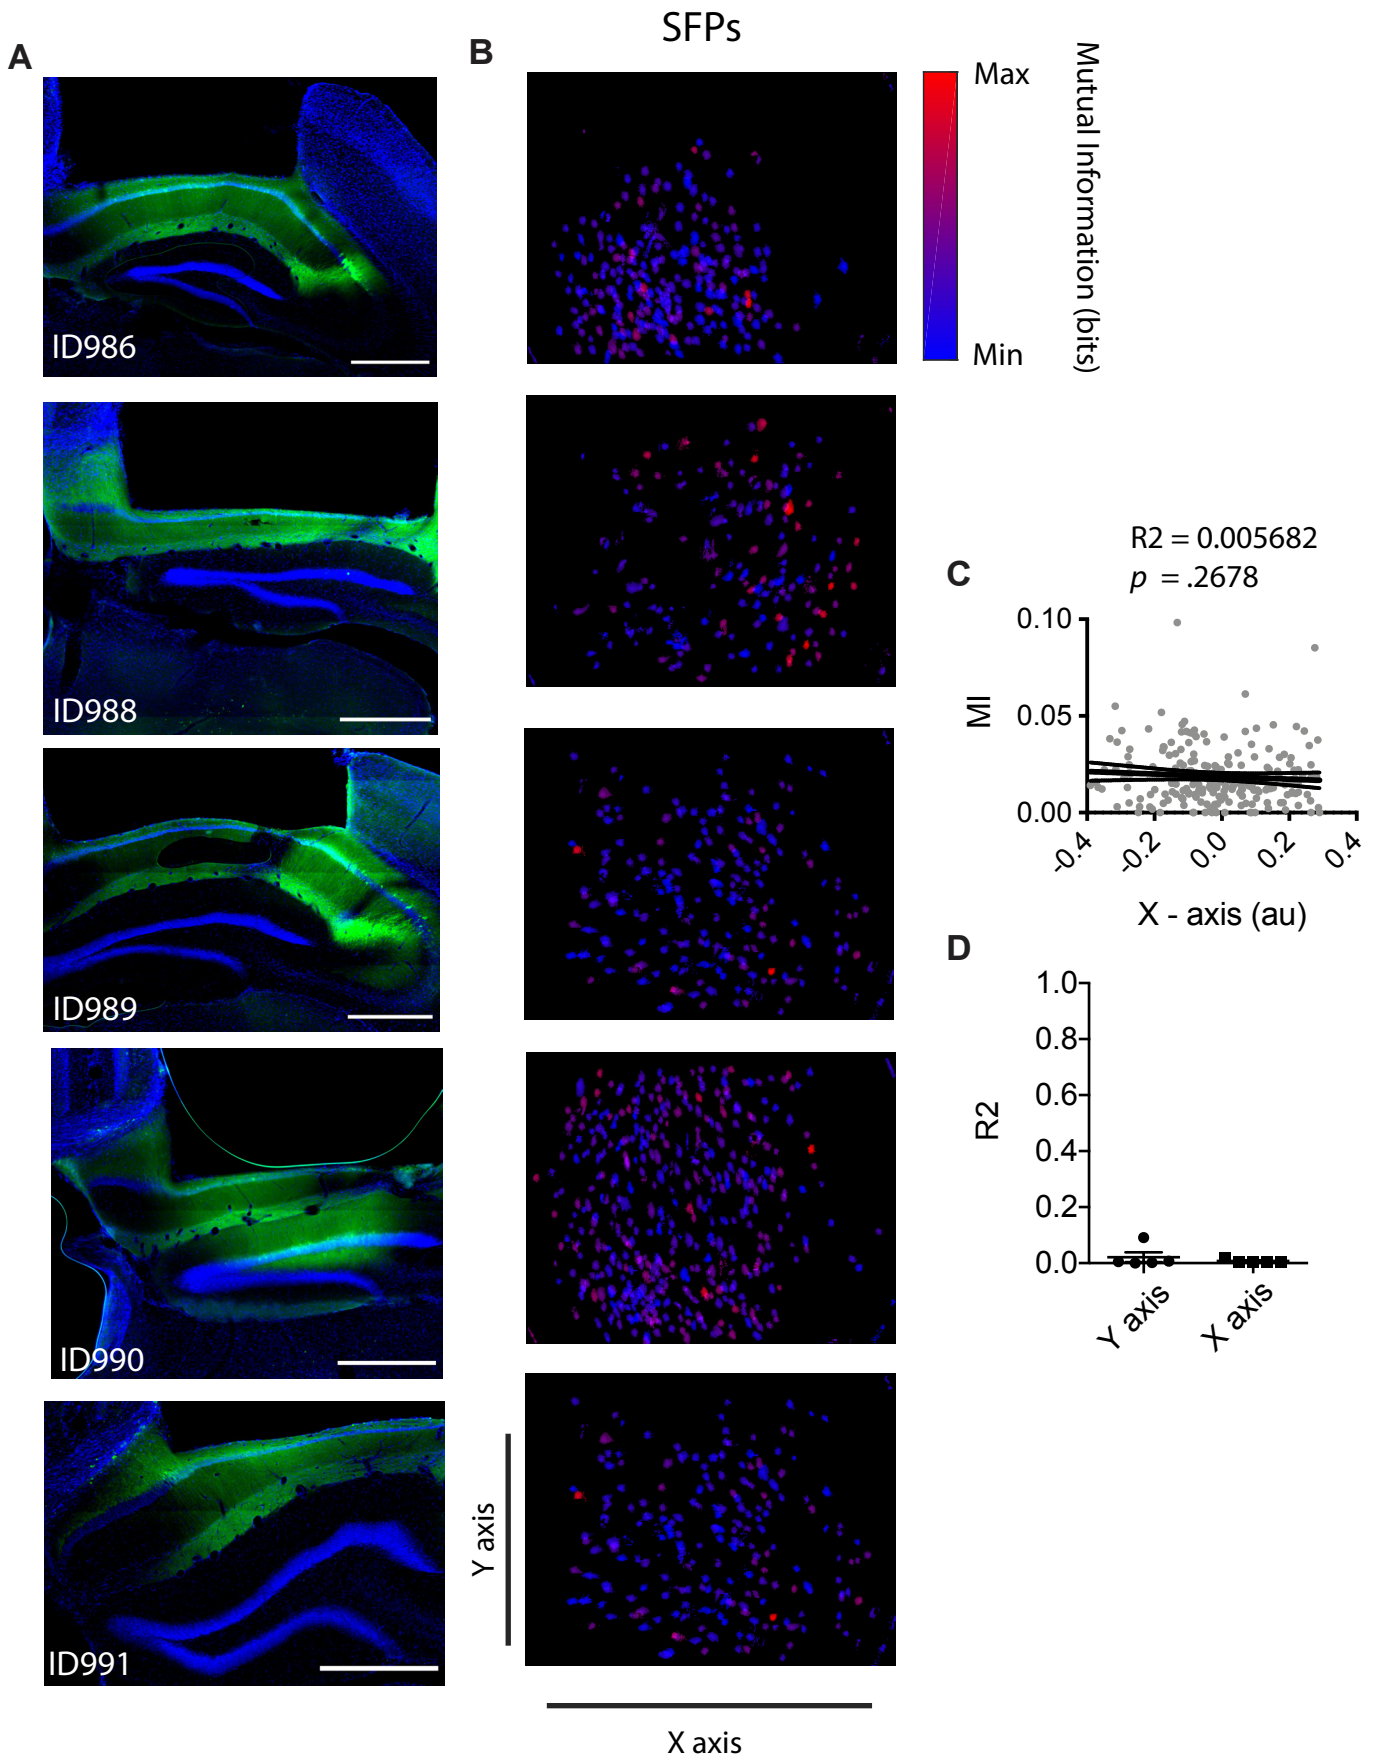

# S3 Fig

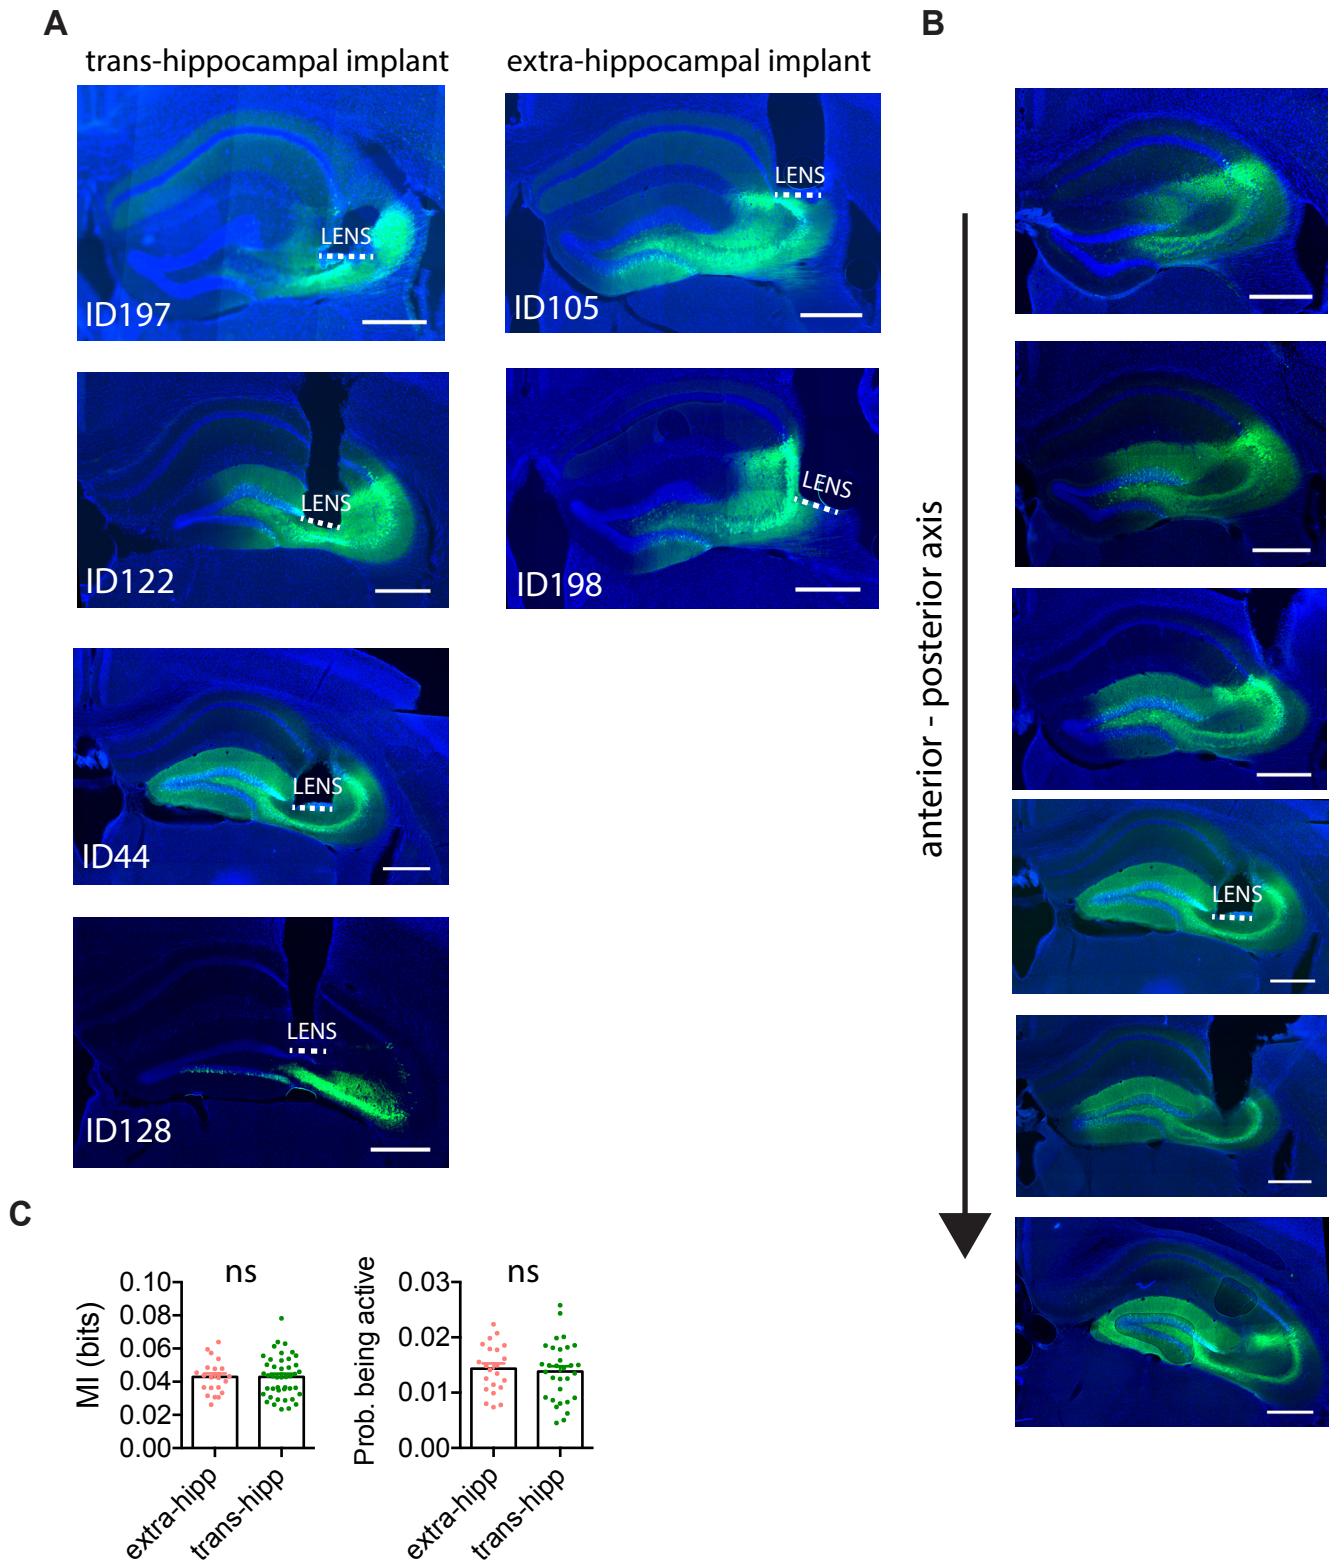

**S4 Fig**

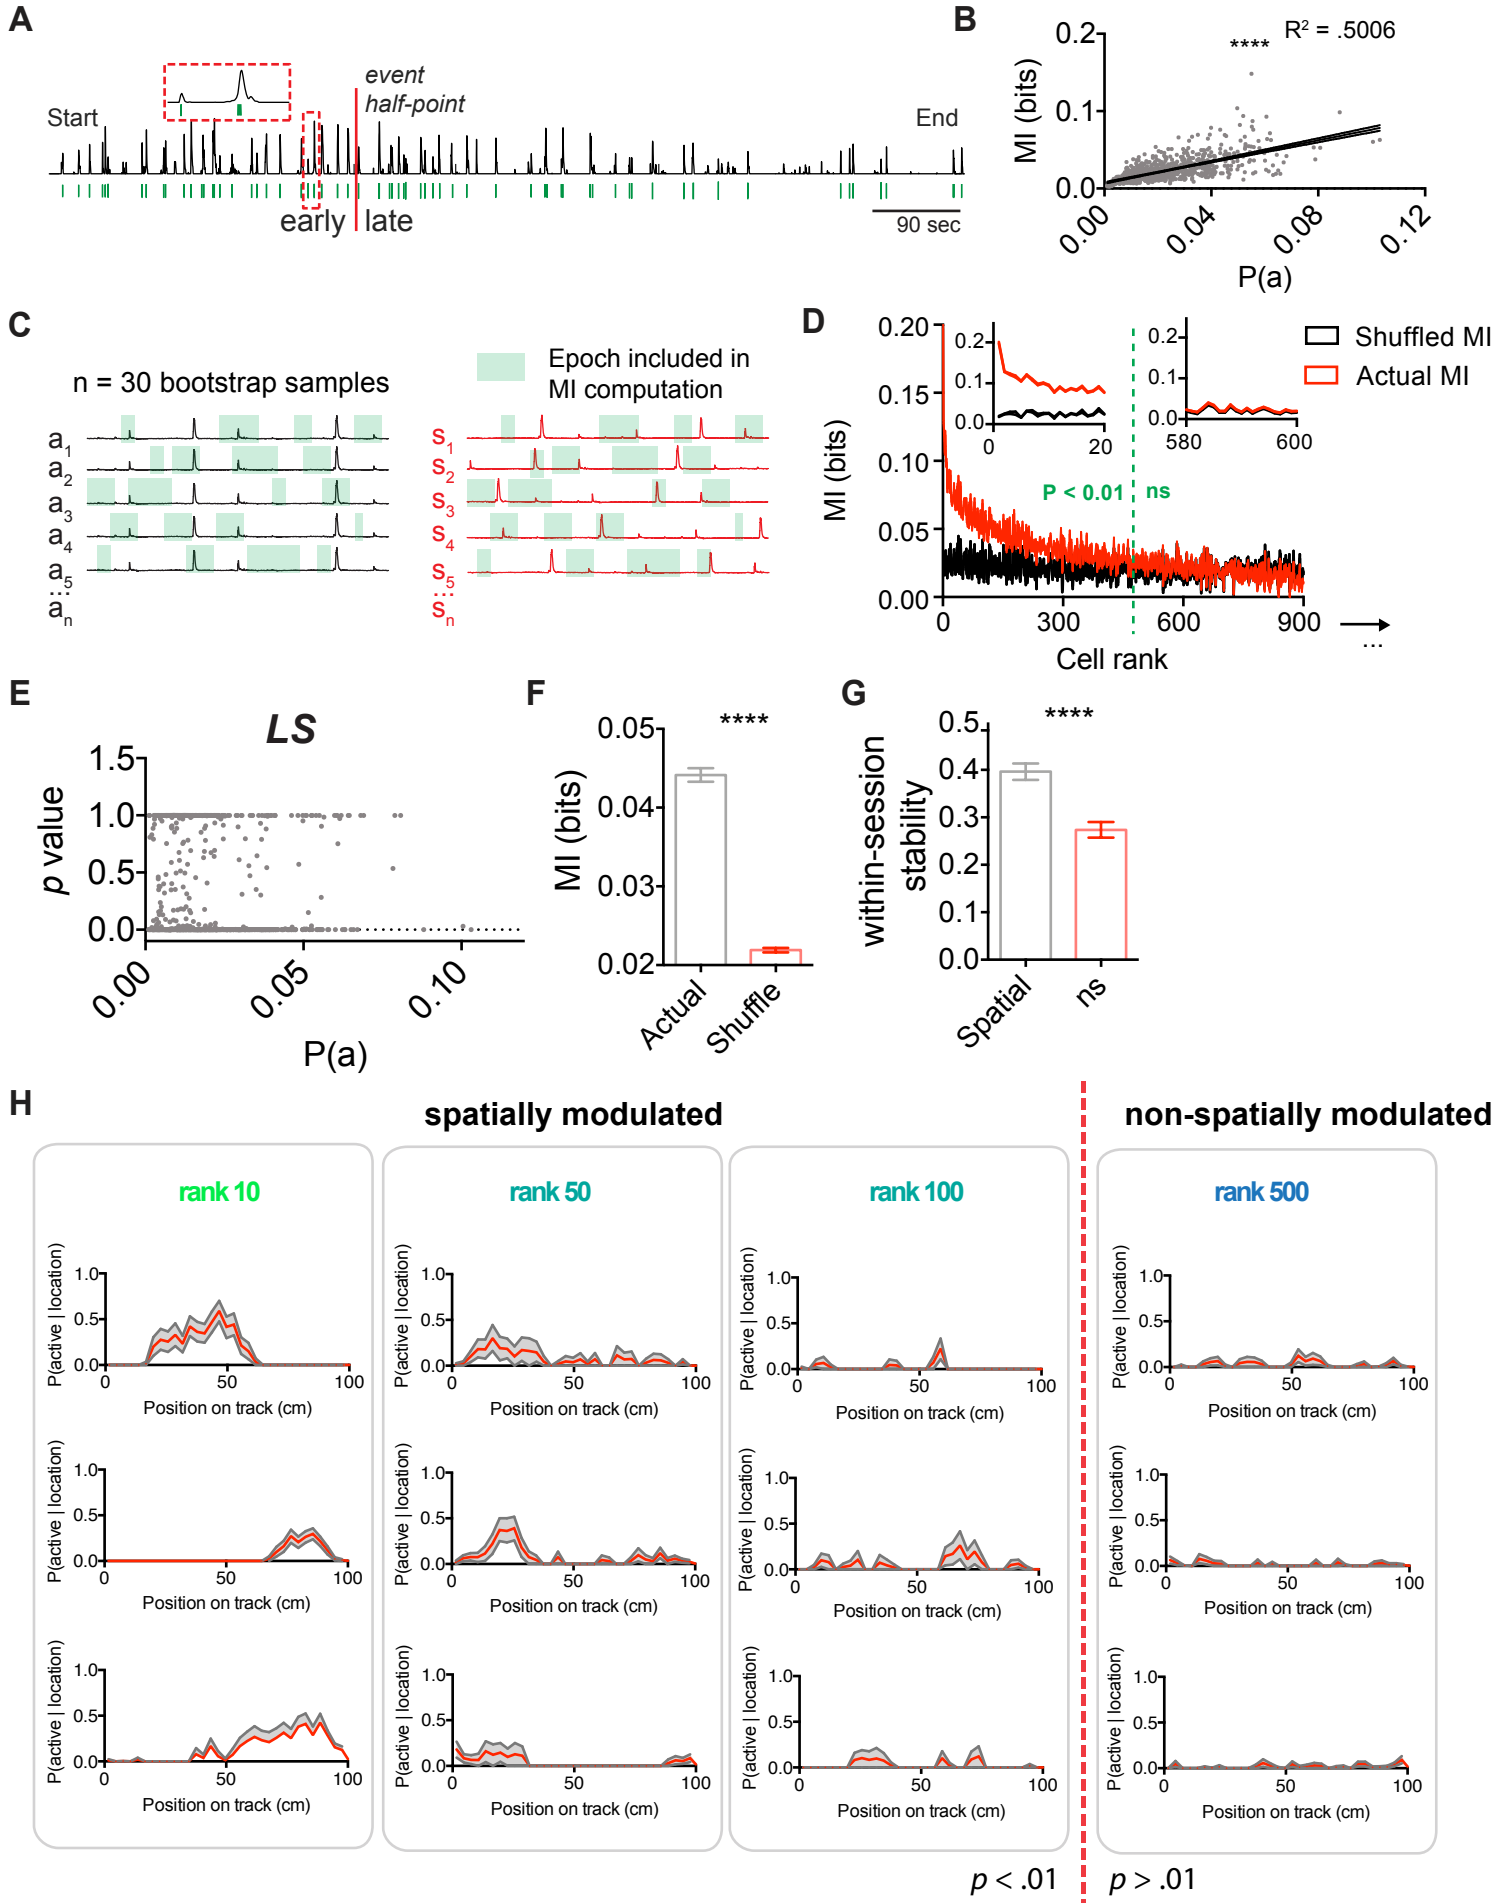

# S5 Fig

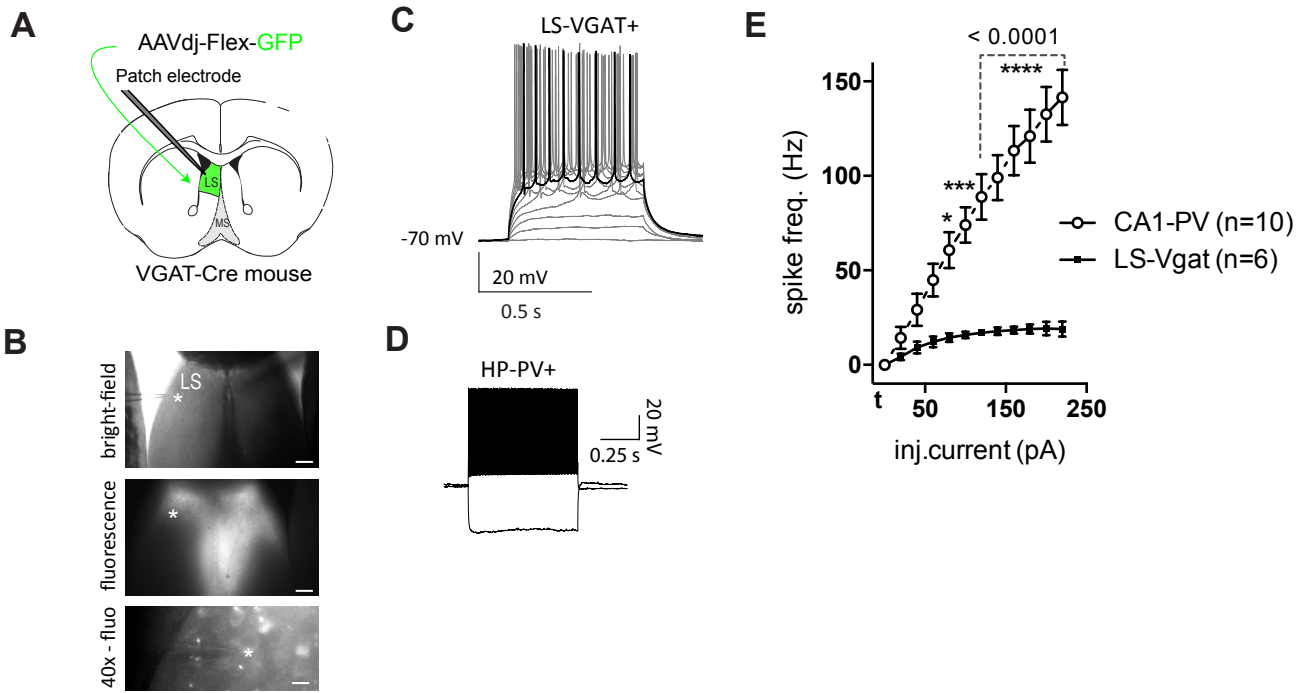

# S6 Fig

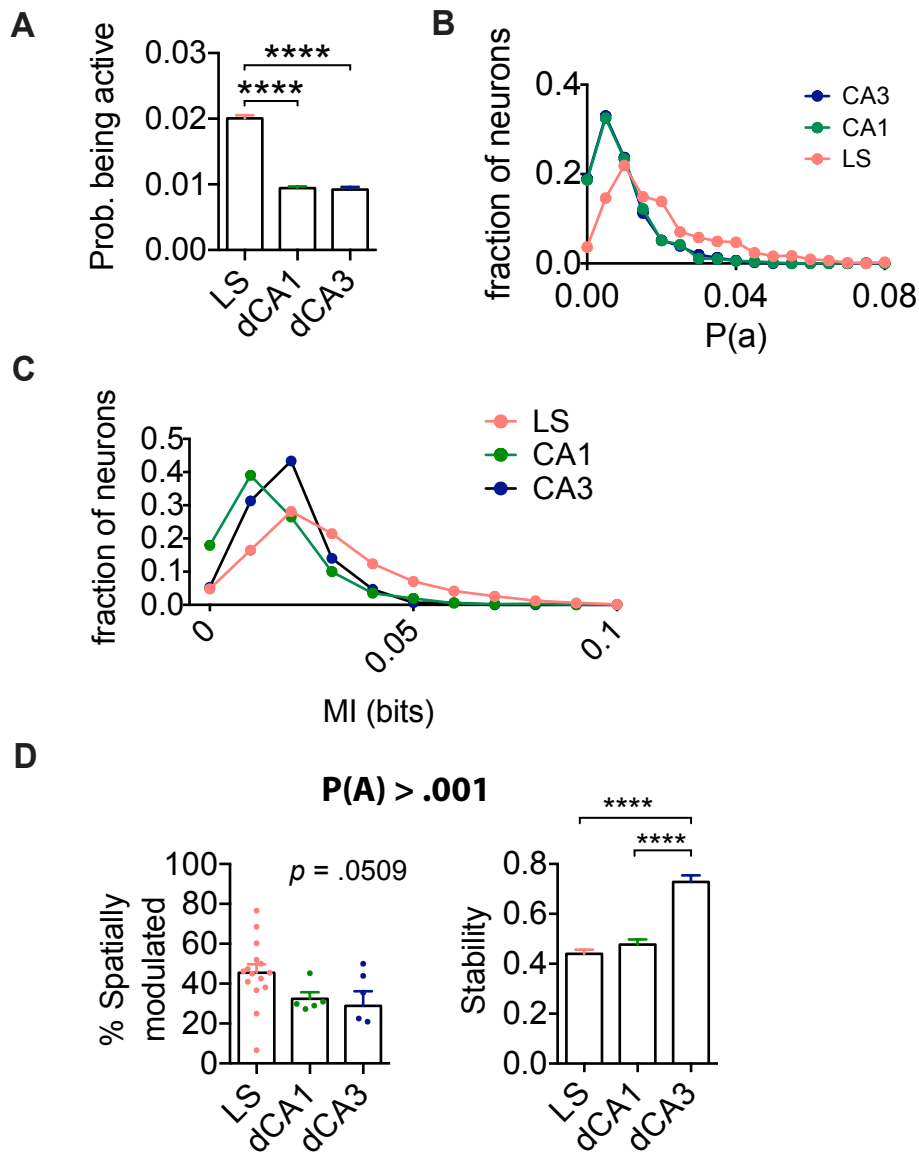

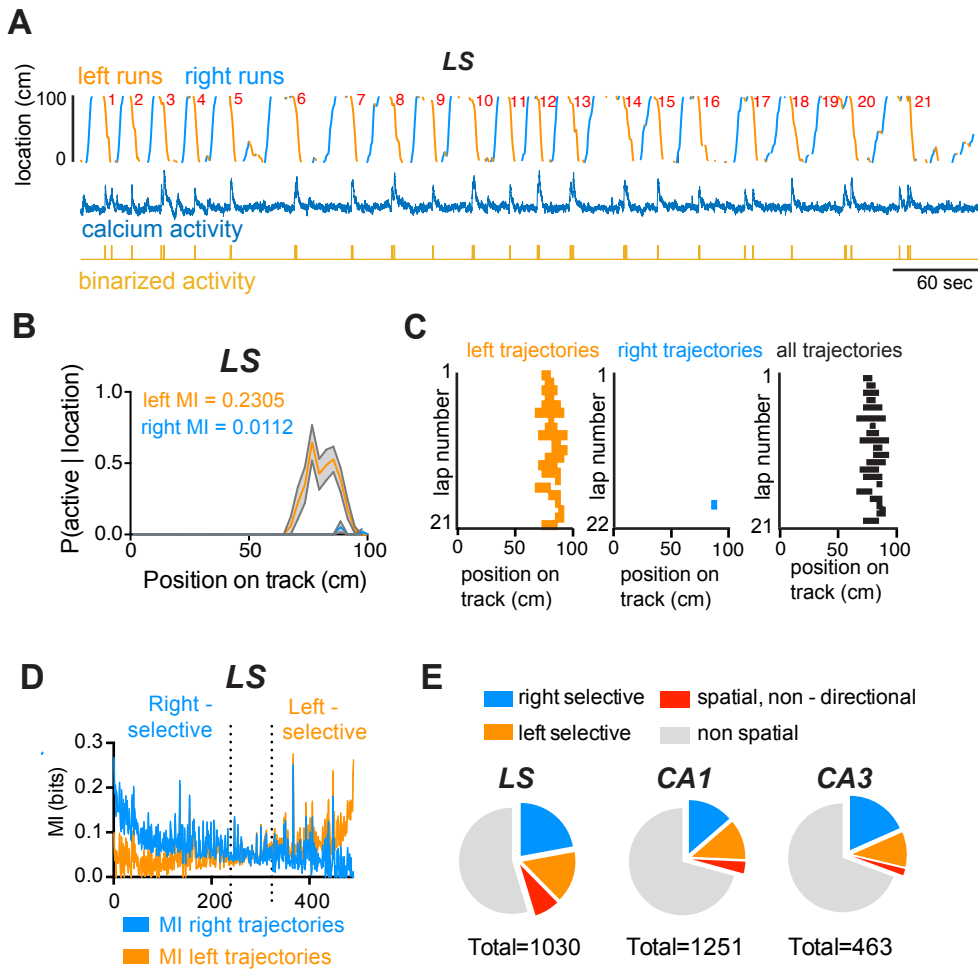



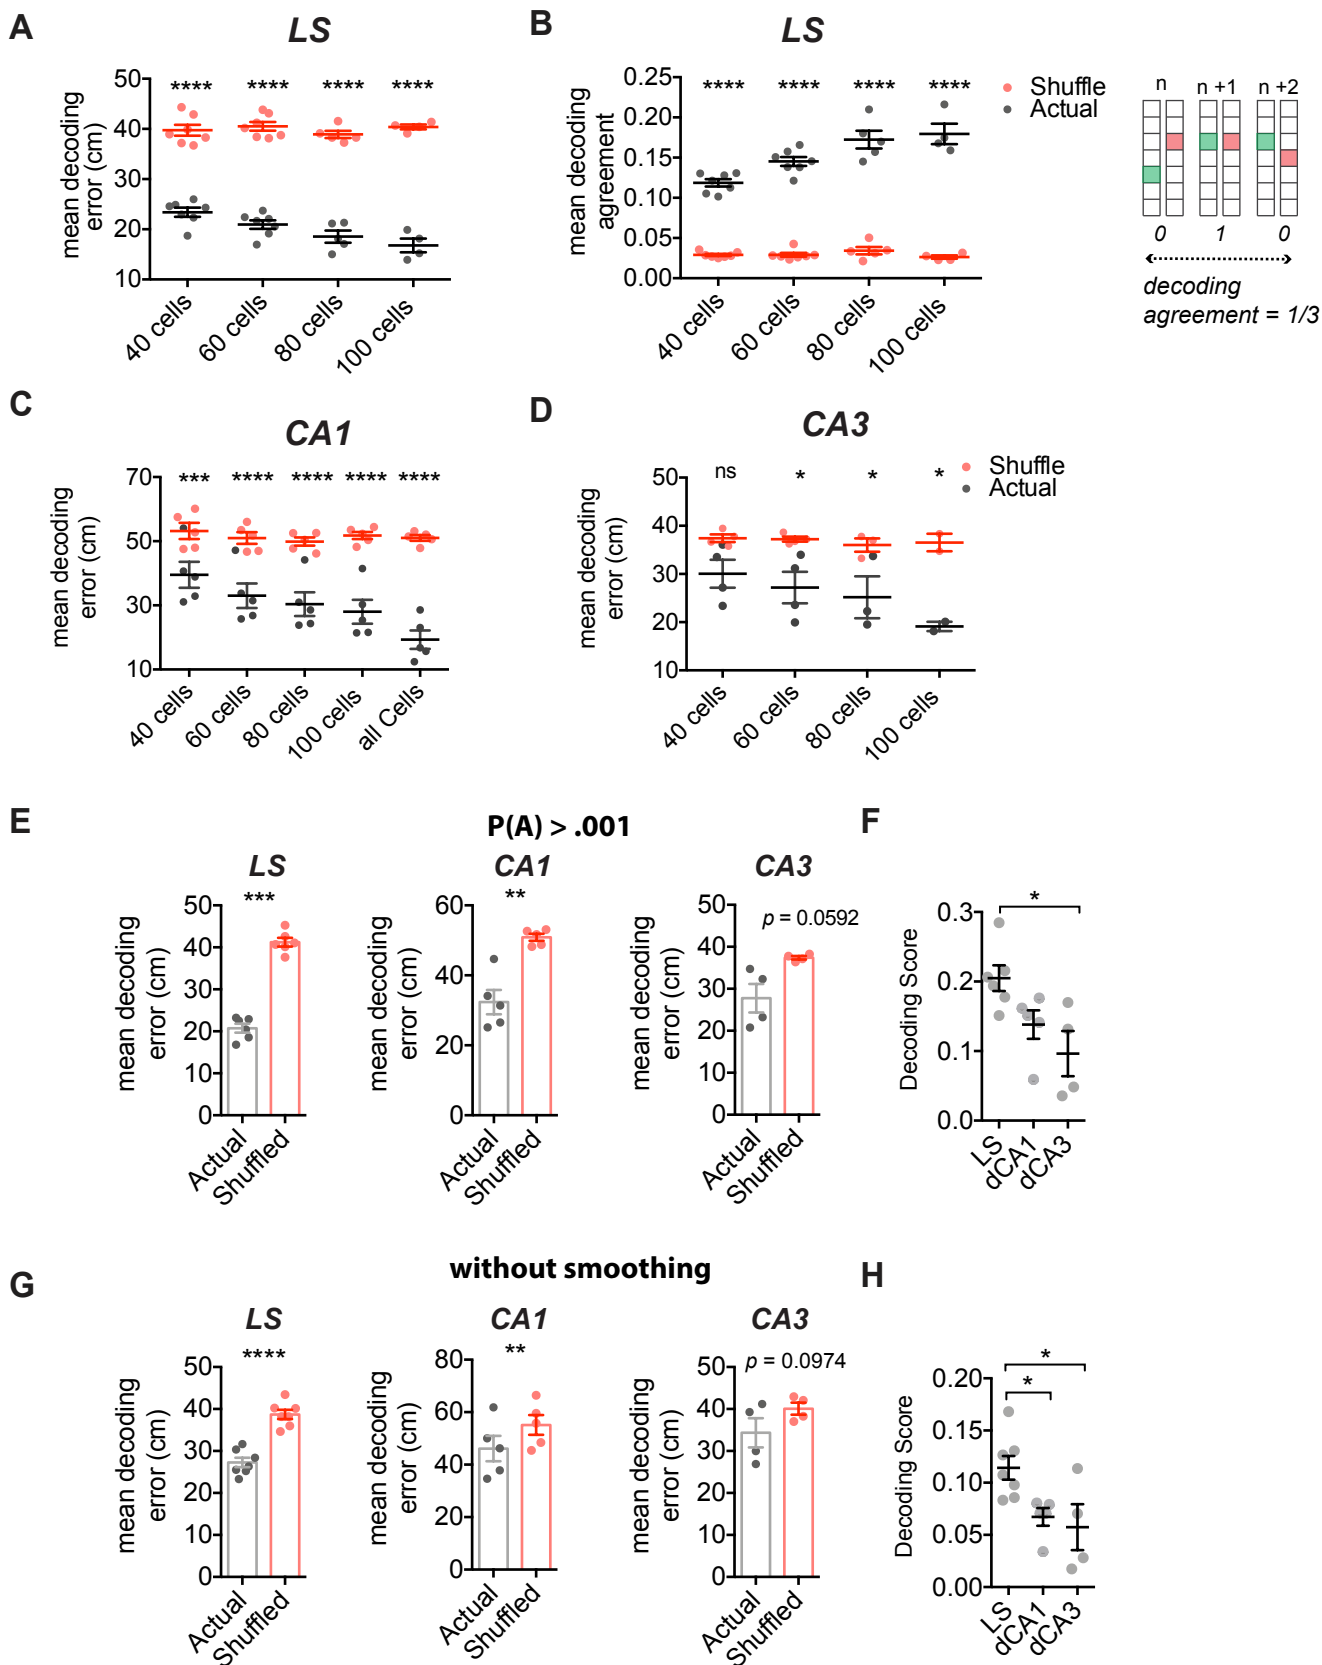

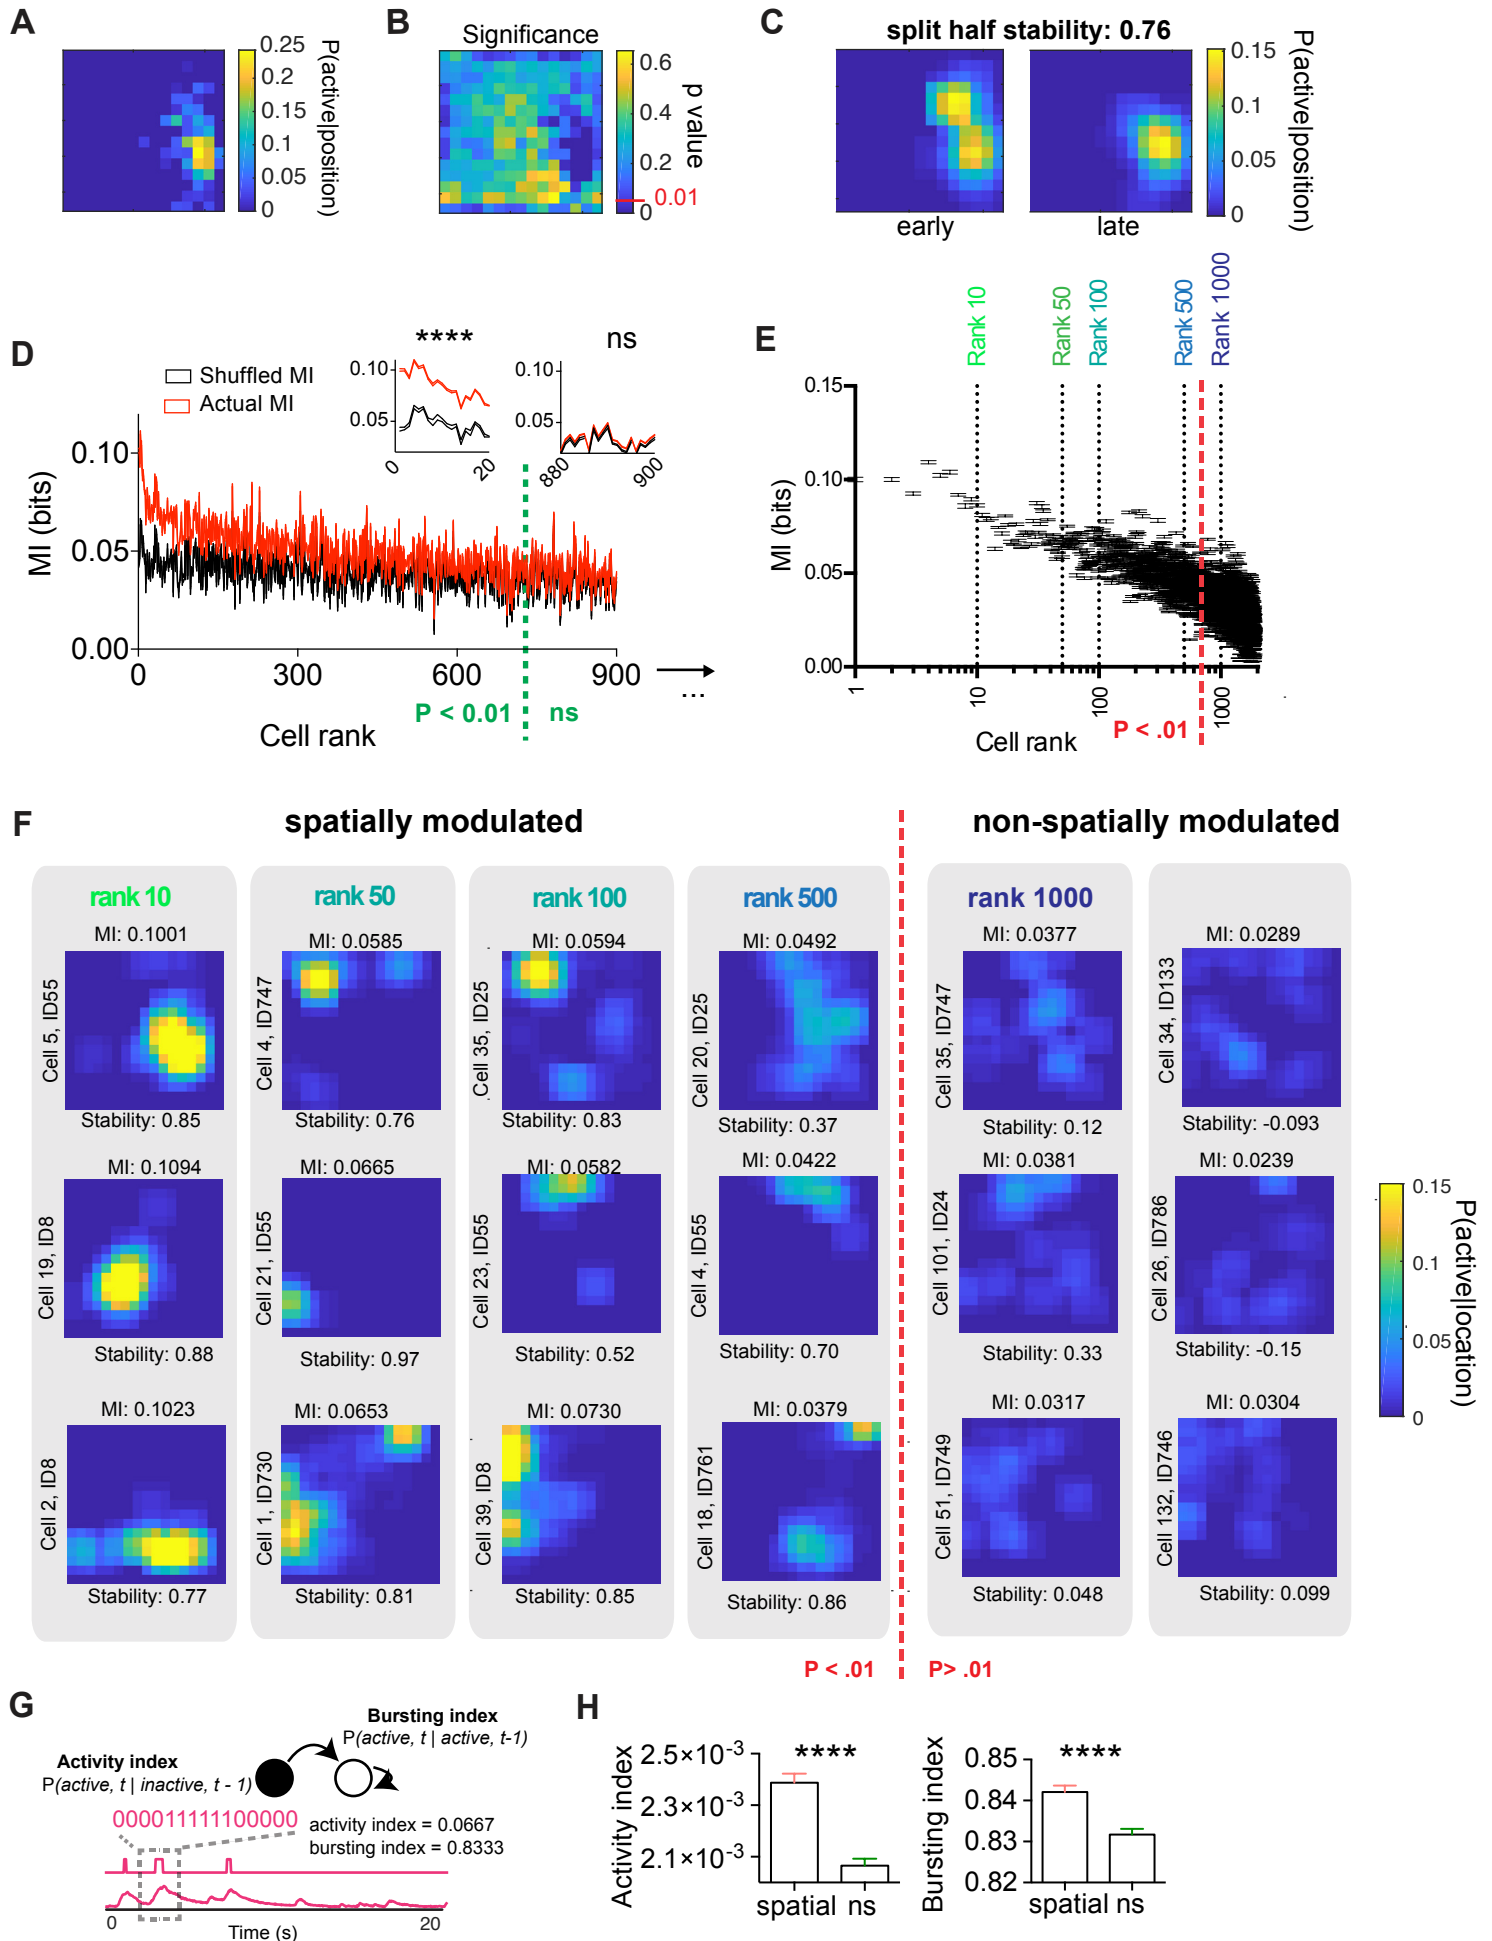

S10 Fig

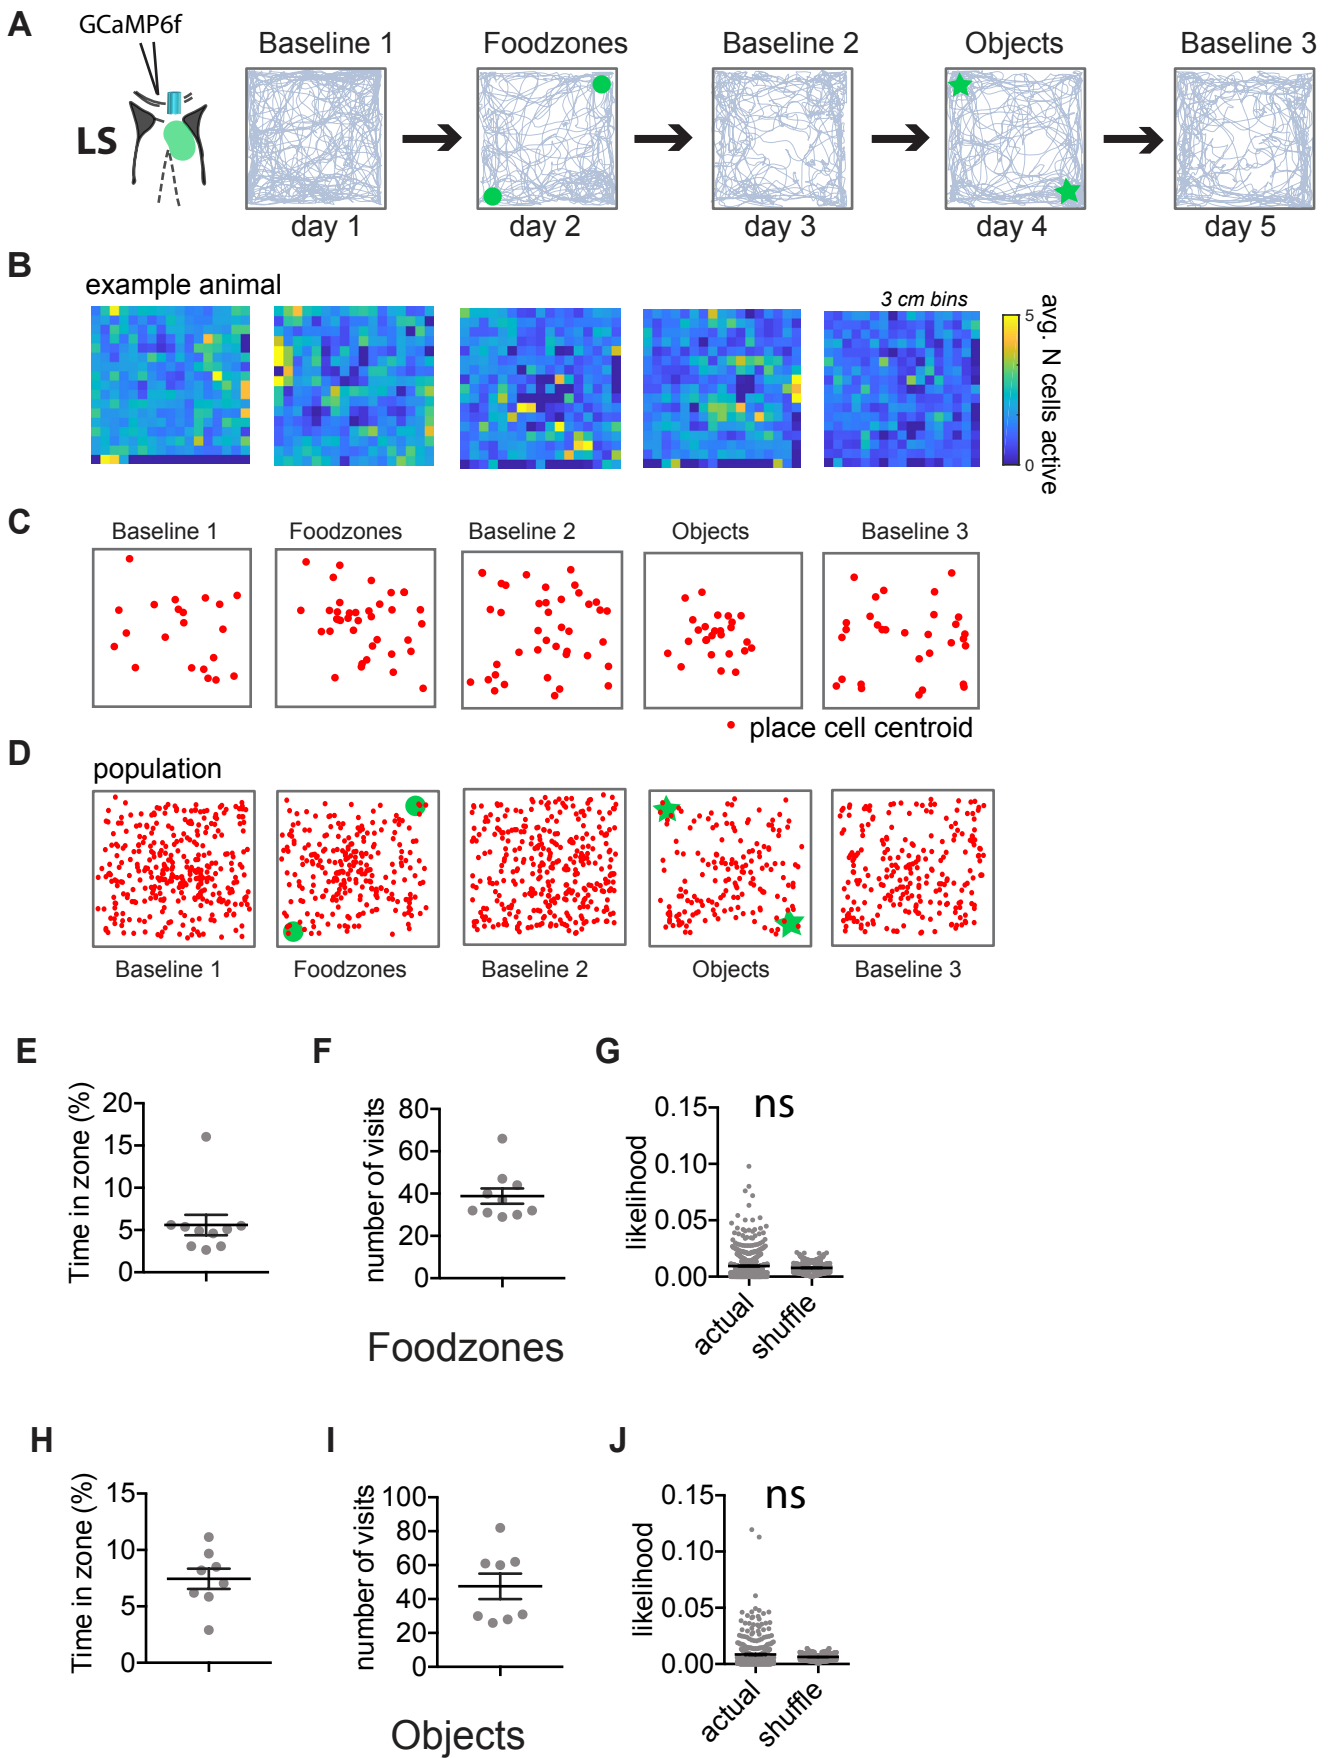

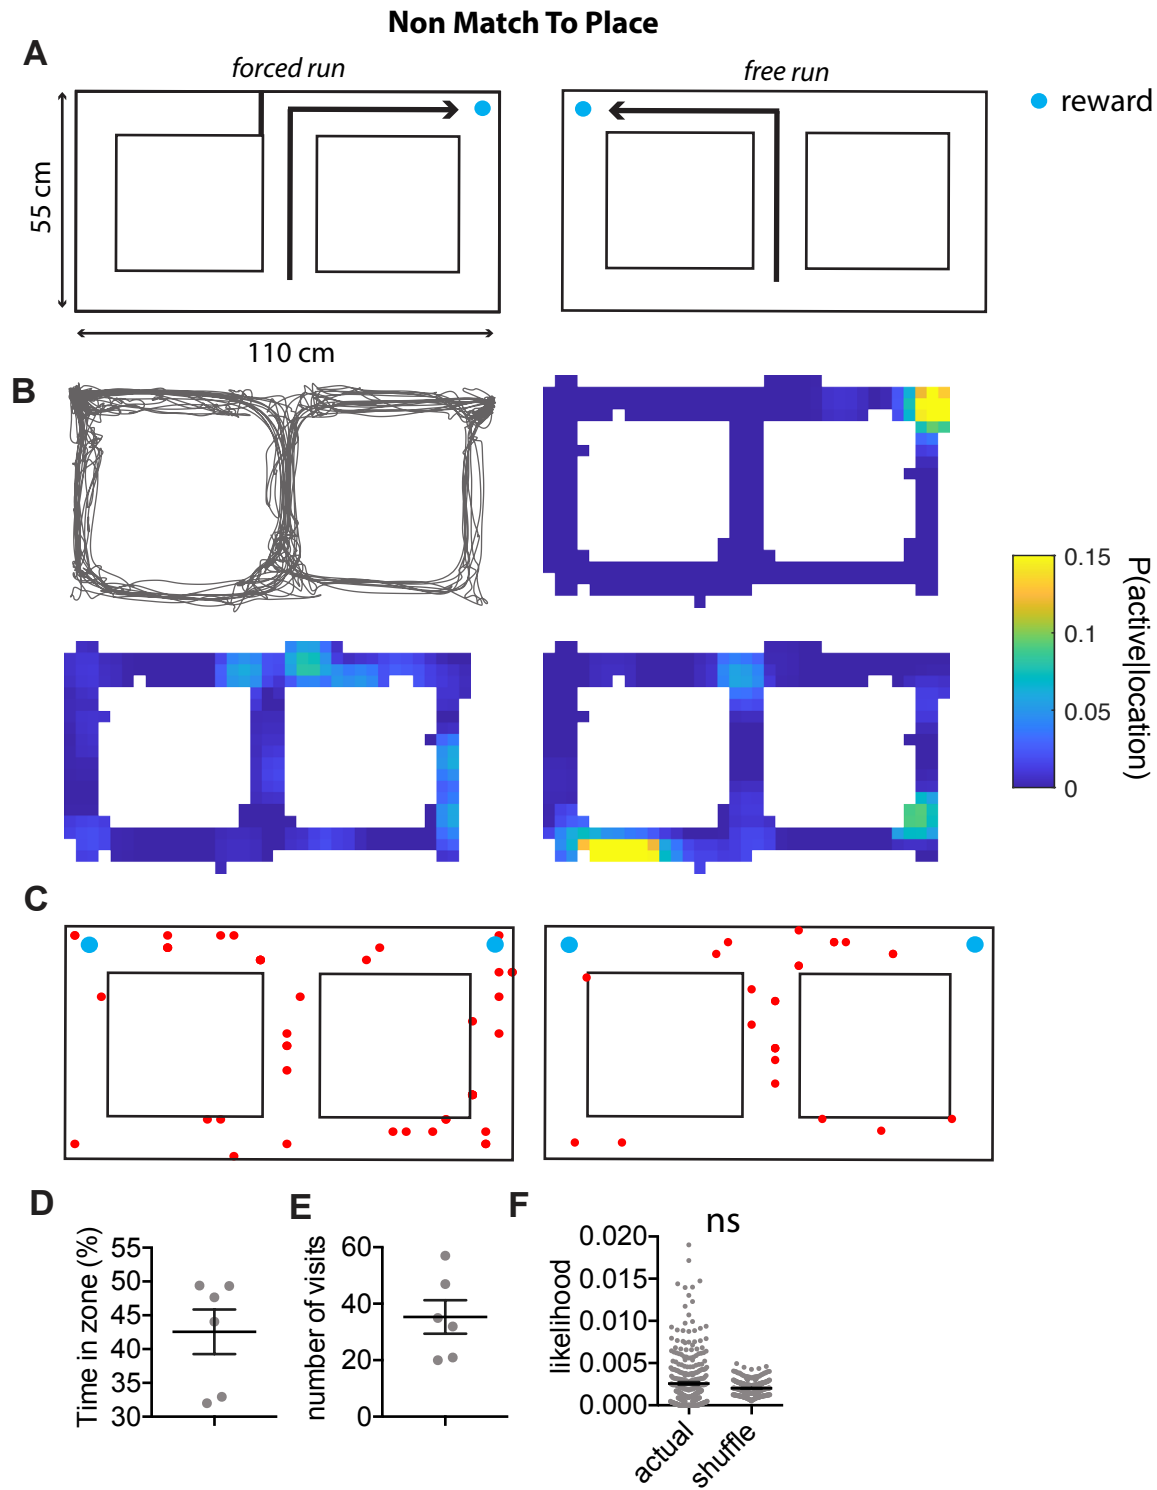

**P(A) > .001**

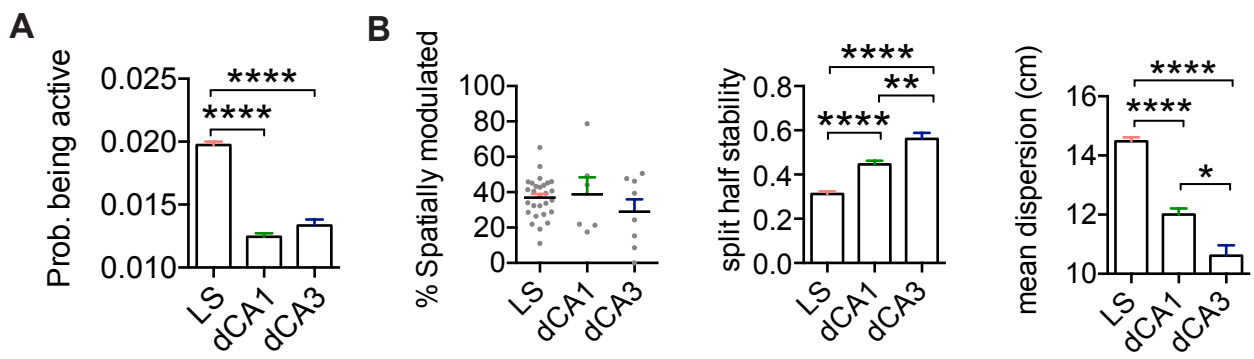

S13 Fig

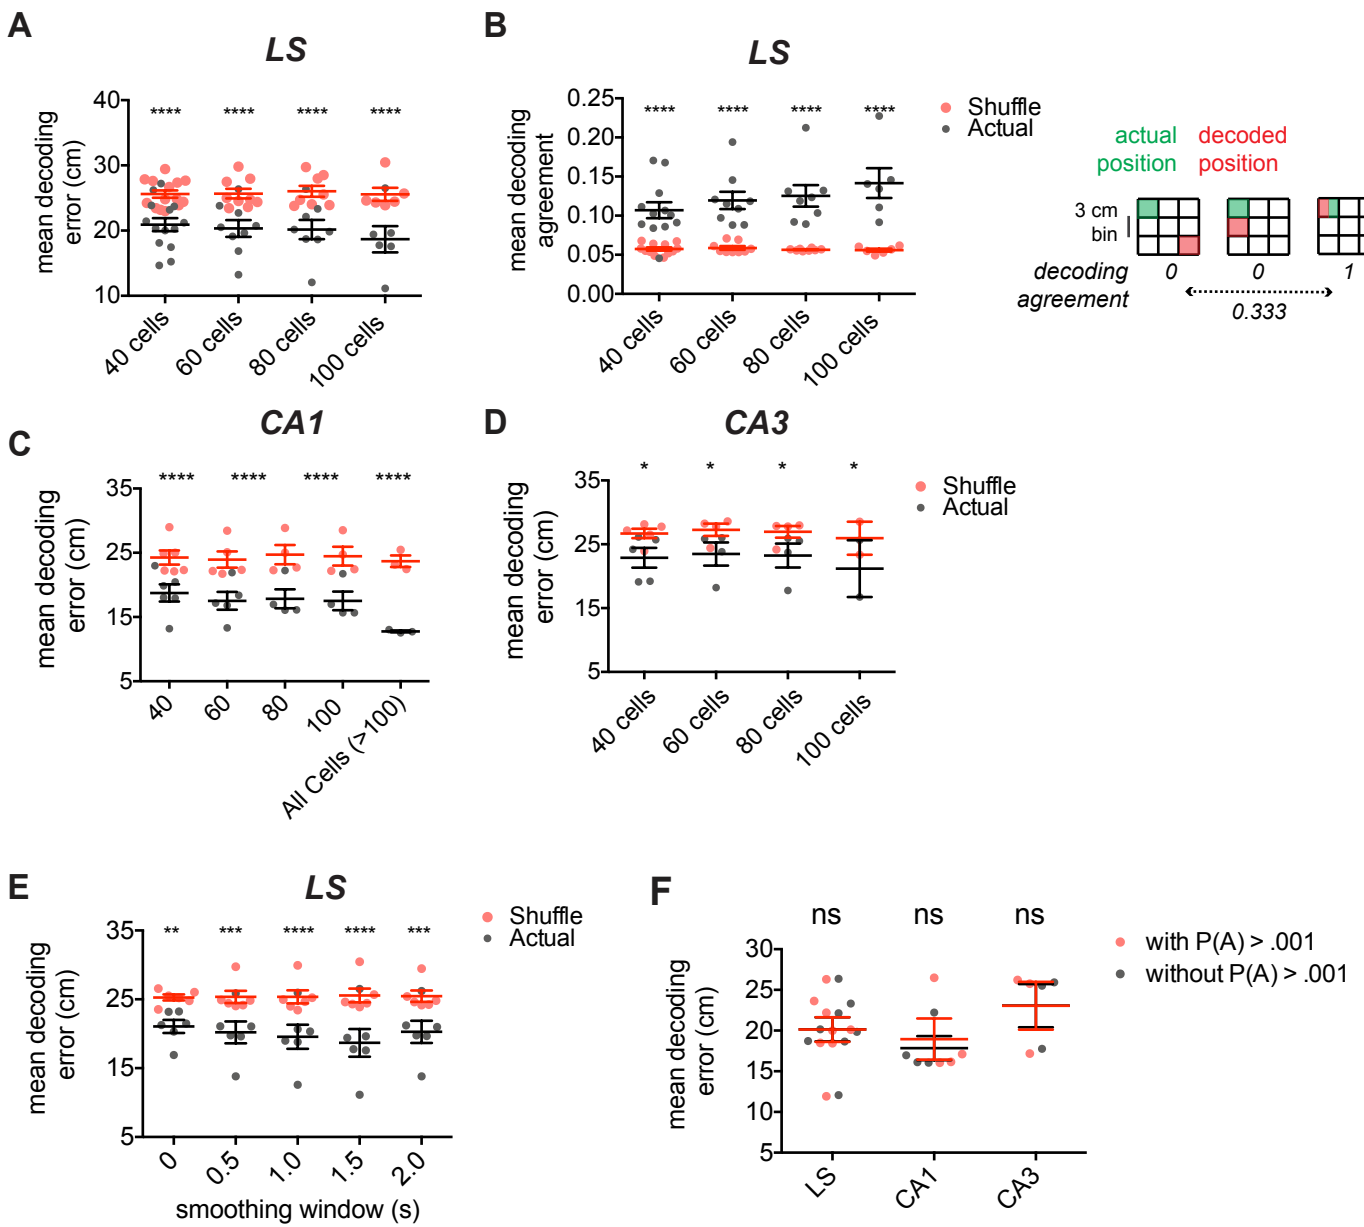

# S14 Fig

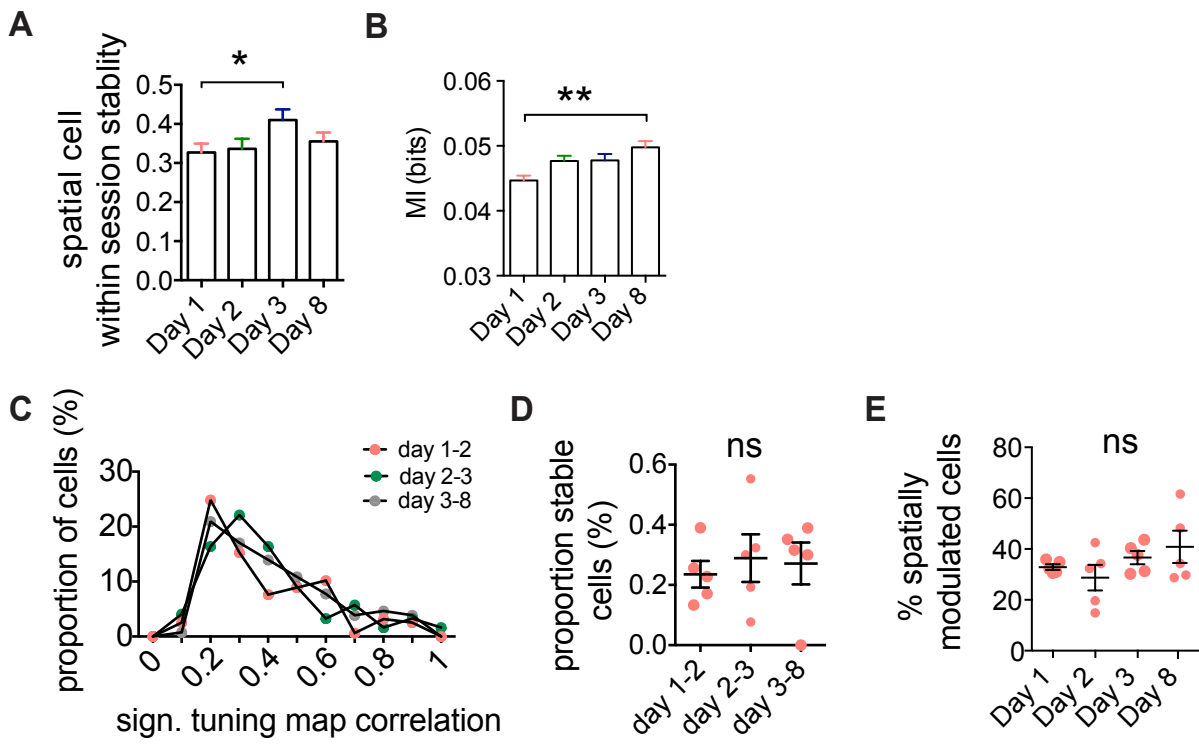

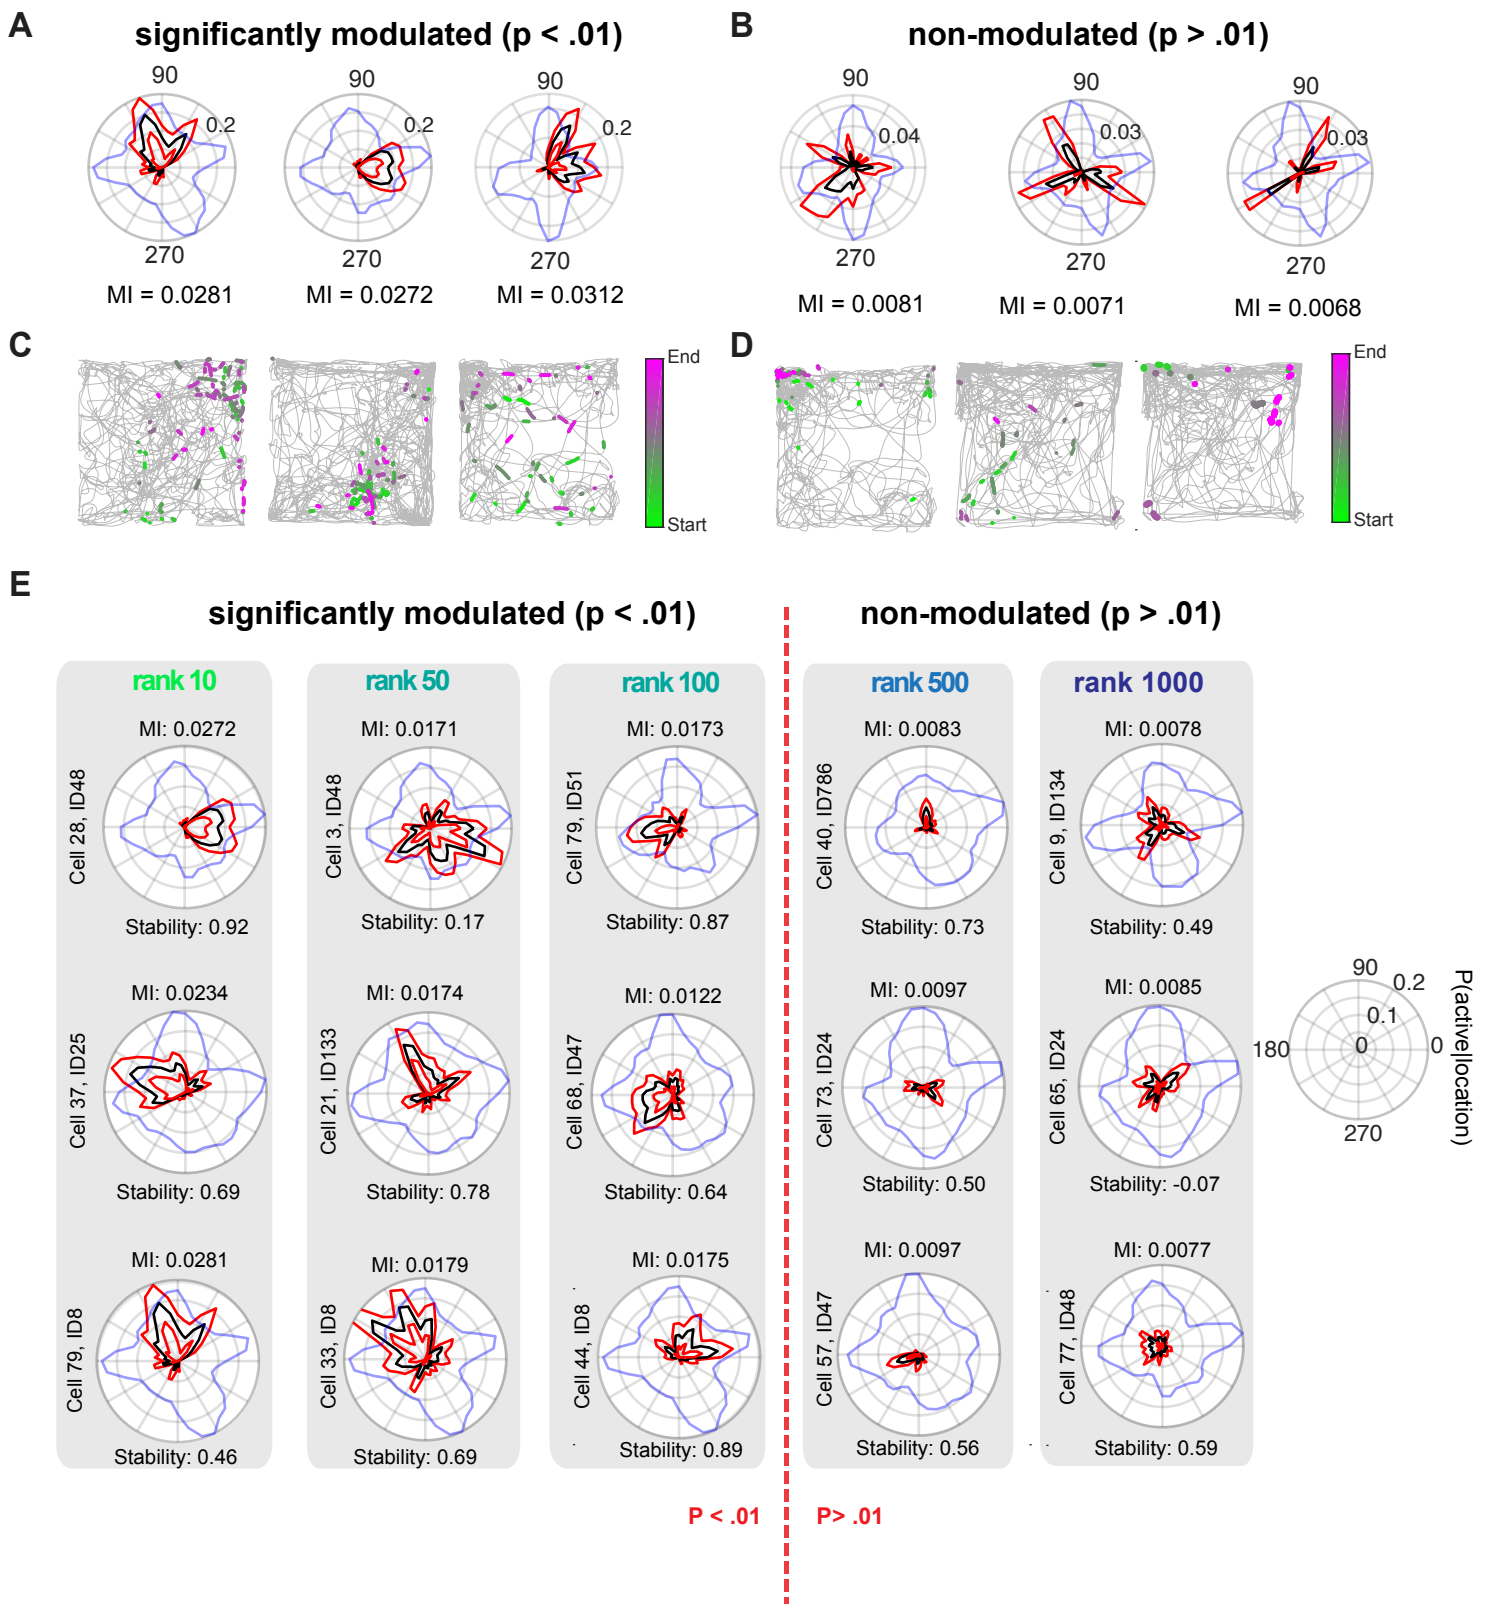



**S16 Fig**

**A**

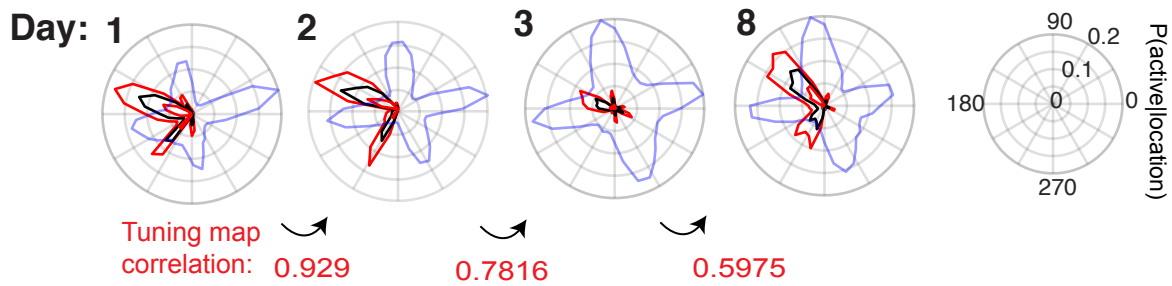

**Direction**

**Direction**

**B**

**LS**

**CA1**

**C**

**LS**

**CA1**

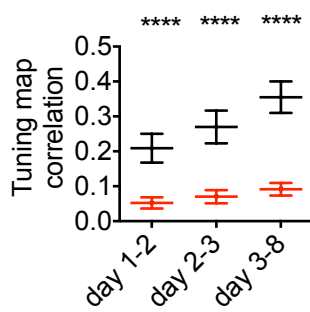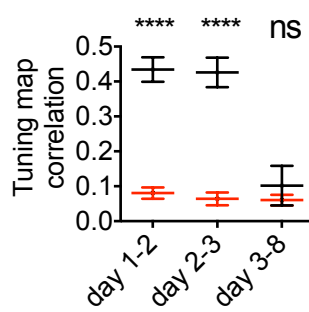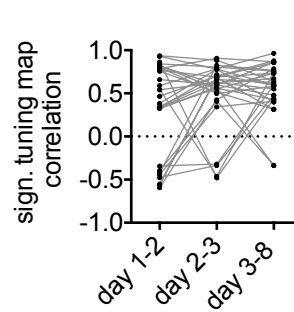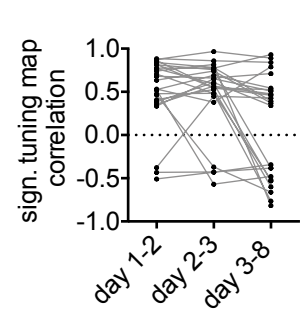

**D**

**LS**

**Velocity**

**CA1**

**E**

**LS**

**Acceleration**

**CA1**

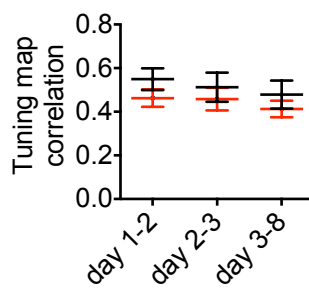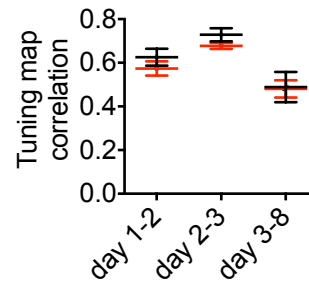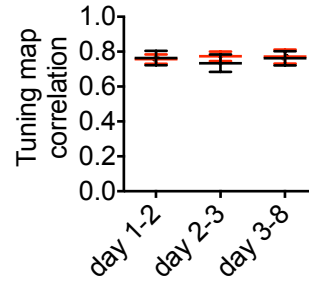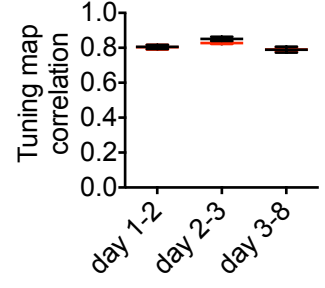

S17 Fig

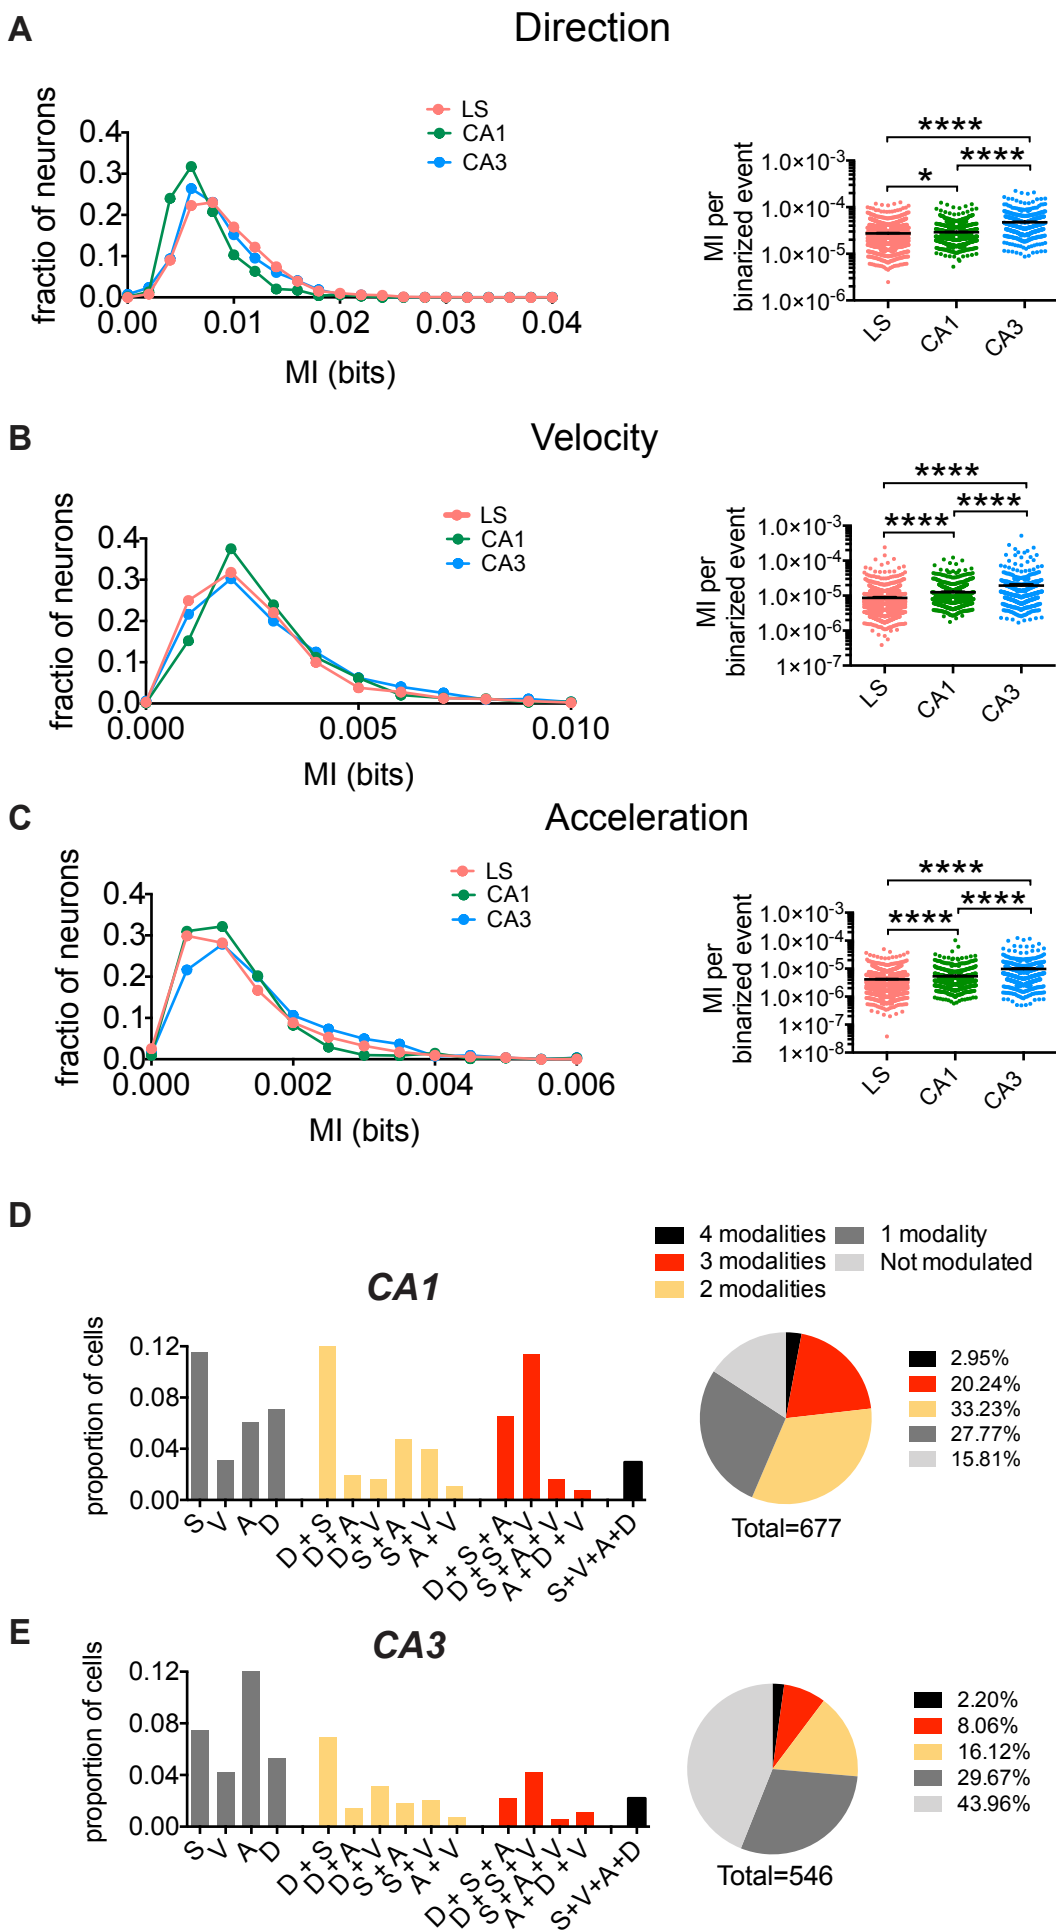

# S18 Fig

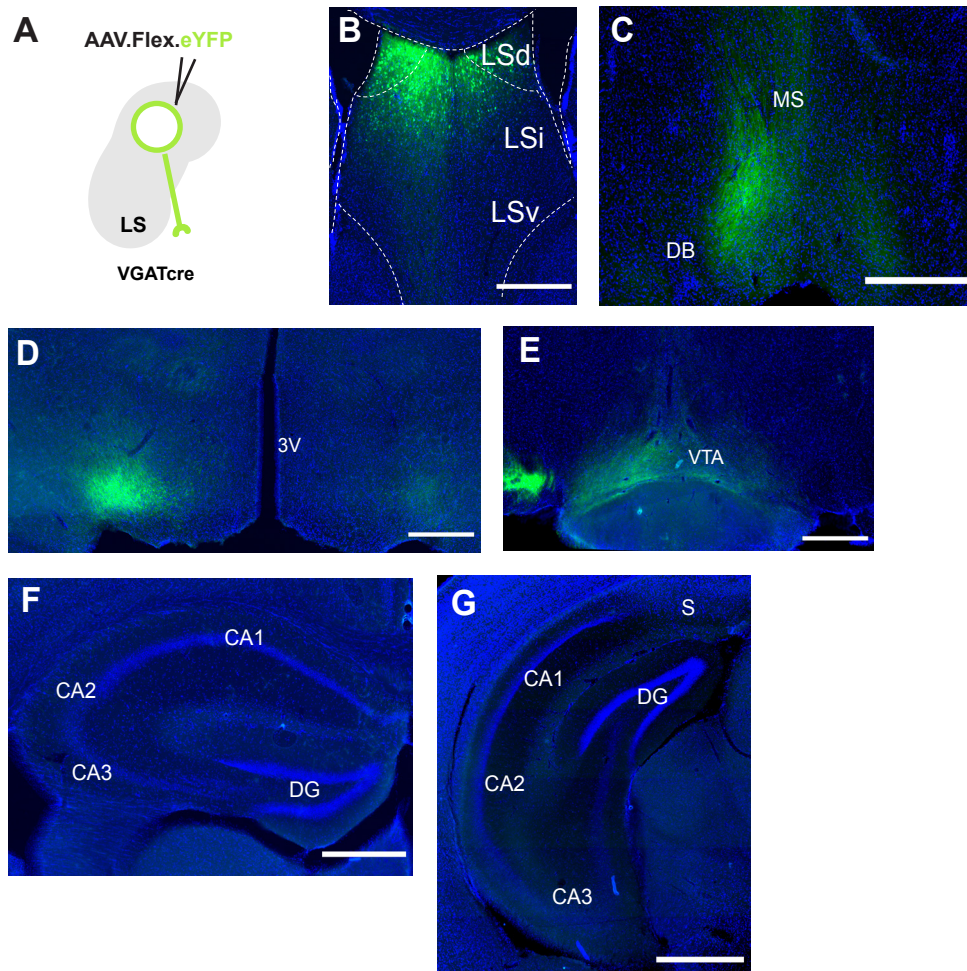

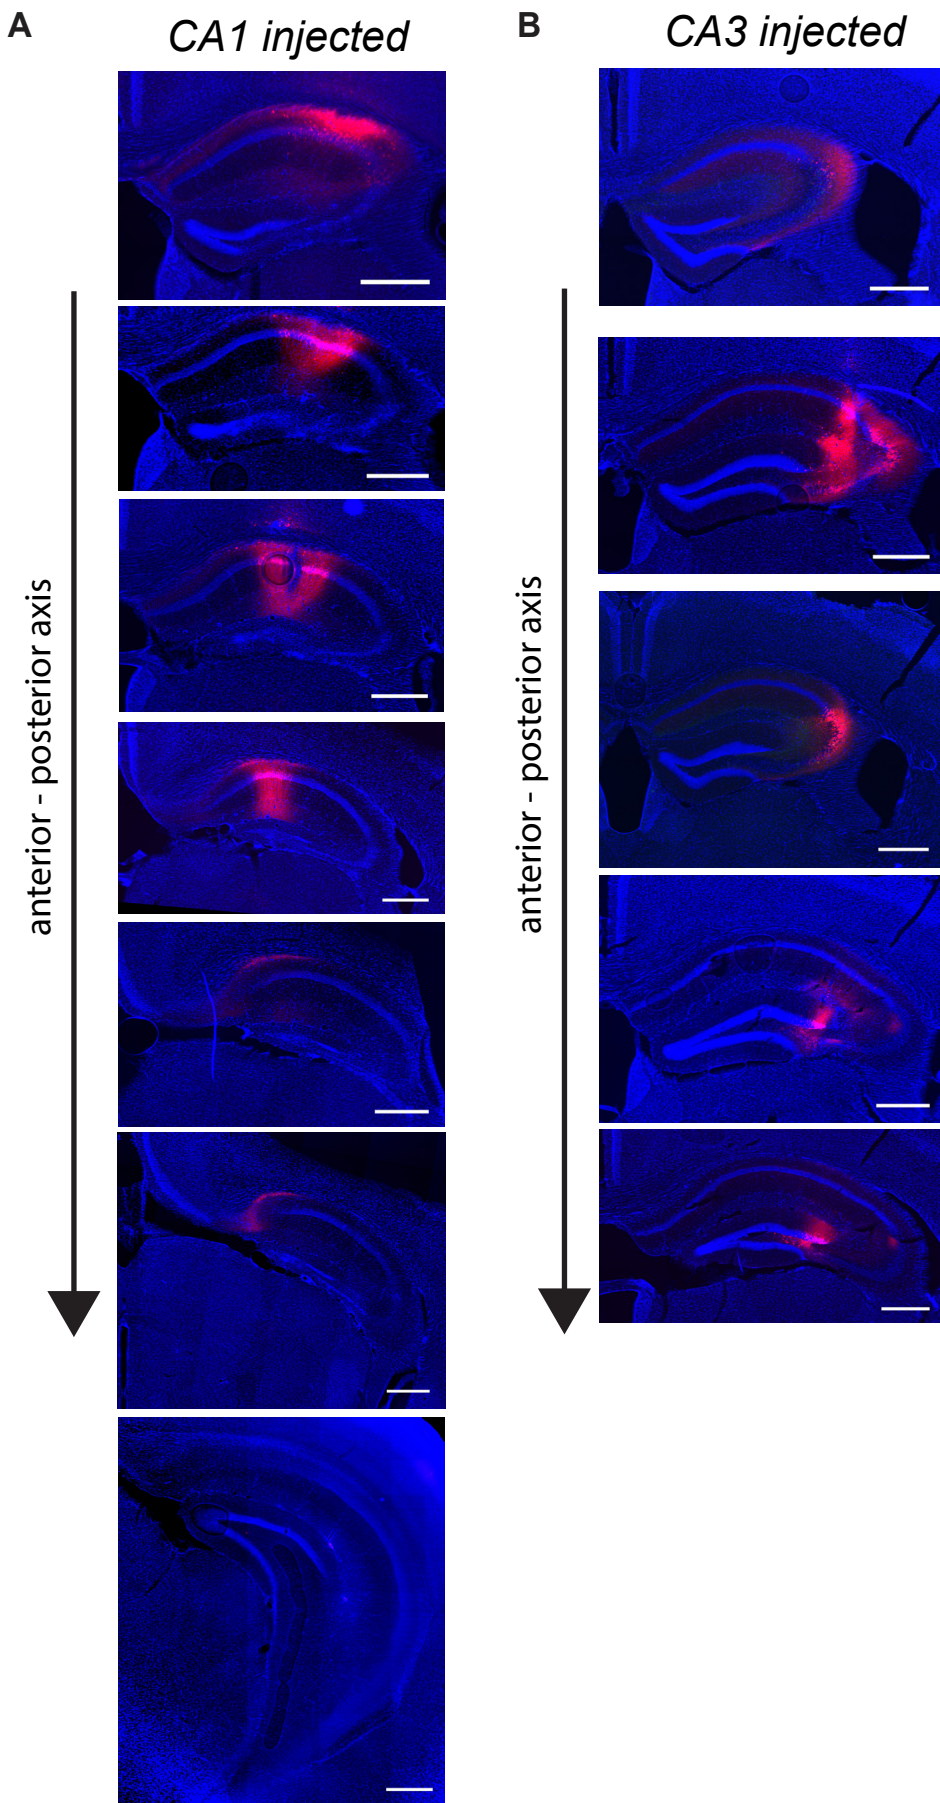

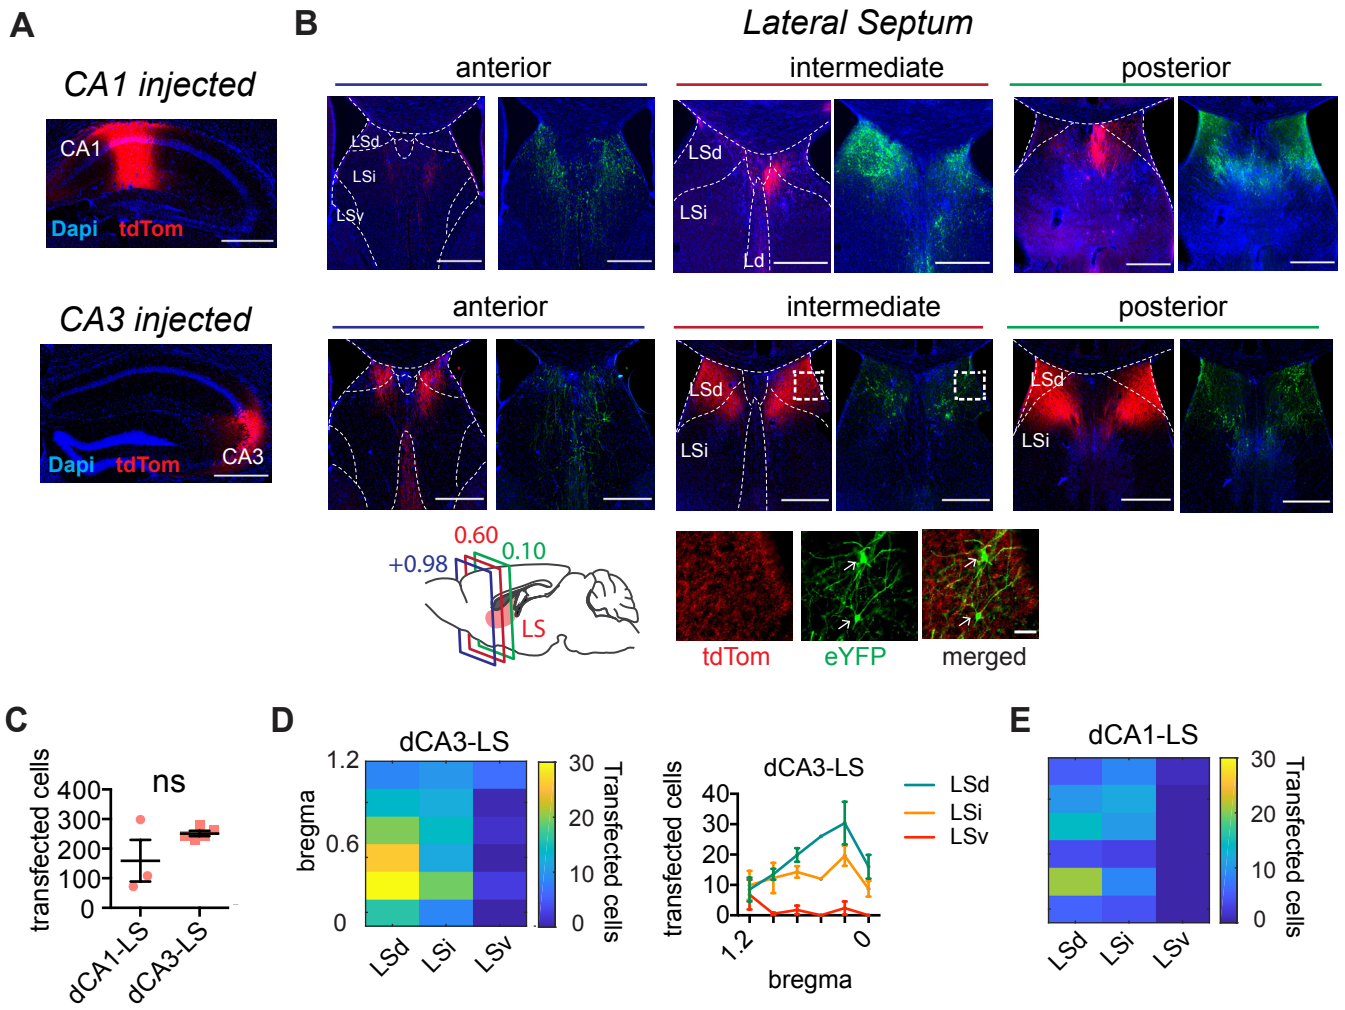

## S21 Fig

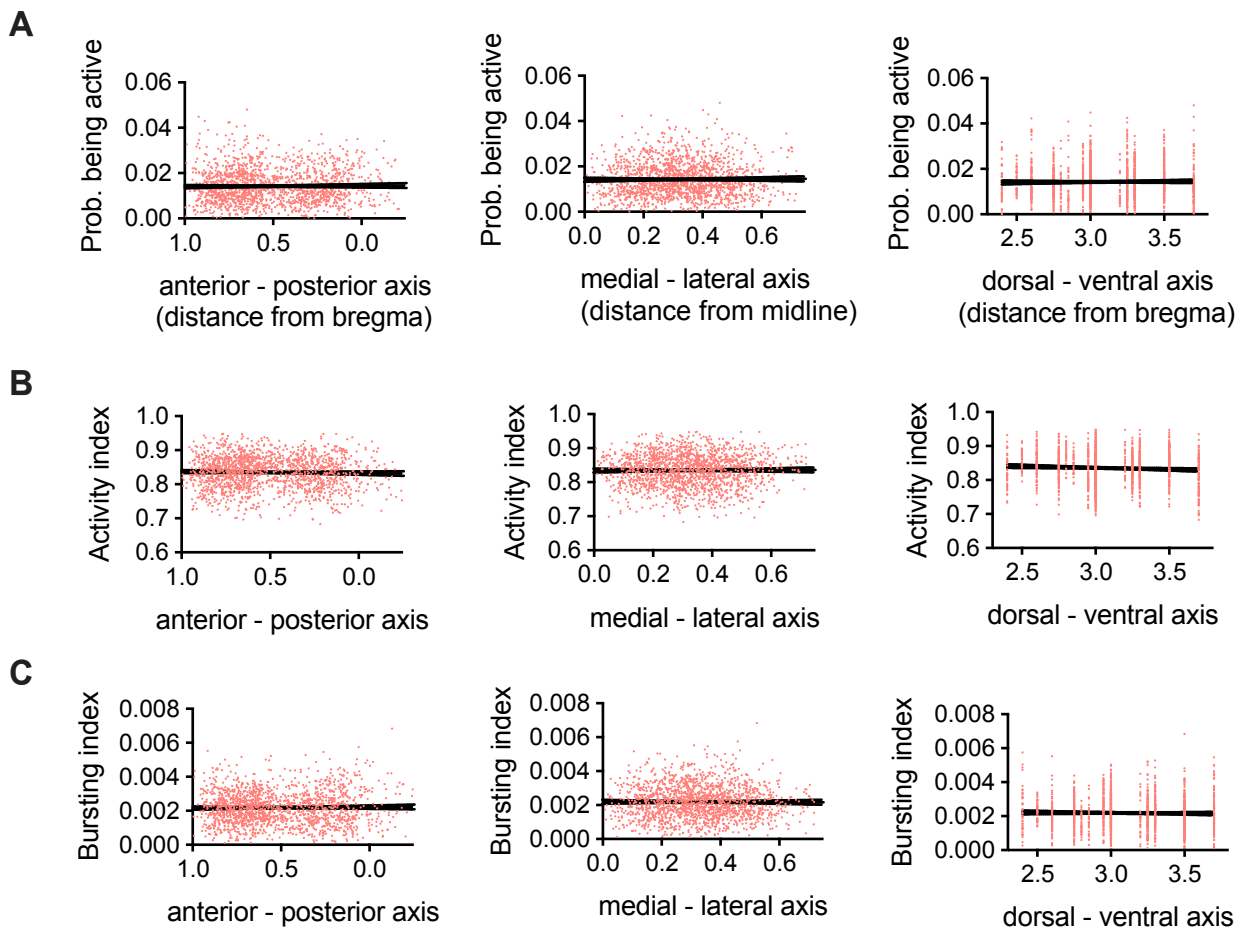

Source: https://www.biorxiv.org/content/10.1101/2020.11.03.366849v3.full.pdf
